# Supplementary material for: Sickle Cell Trait Induces Oxidative Damage on Plasmodium falciparum Proteome at Erythrocyte Stages
Source: MDPI journal article supplement (doi:10.3390/ijms20225769), 2019-11-16

**Supplementary Material 2**  
**Results of search in Mascot for Peptide Mass Fingerprint (PMF) and MS/MS Data**

**Sickle cell trait induce oxidative damage on *Plasmodium falciparum* proteome at erythrocyte stages.**

Alber Díaz-Castillo<sup>a</sup>, Neyder Contreras-Puentes<sup>b</sup>, Ciro Alvear-Sedán<sup>c</sup>, Carlos Moneriz-Pretell<sup>c</sup>,  
Erika Rodríguez-Cavallo<sup>b\*</sup> and Darío Méndez-Cuadro<sup>a\*</sup>

<sup>a</sup> Analytical Chemistry and Biomedicine Group. Exacts and Natural Sciences Faculty. University of Cartagena. Cartagena-Colombia.

<sup>b</sup> Analytical Chemistry and Biomedicine Group. Pharmaceuticals Sciences Faculty. University of Cartagena.

<sup>c</sup> Biochemistry and disease Group. Medicine School. University of Cartagena.

\* Corresponding authors:

Darío Méndez-Cuadro. **Mailing address:** University of Cartagena, Faculty of Exact and Natural Sciences, Campus of San Pablo. Analytical Chemistry and Biomedicine Group, first floor No.109. Cra. 50 #24120, Cartagena, Colombia, AP 130015. **Phone number:** + 57 3015584887. **E-mail:** [dmendezc@unicartagena.edu.co](mailto:dmendezc@unicartagena.edu.co)

Erika Rodríguez-Cavallo. **Mailing address:** University of Cartagena, Faculty of Pharmaceutical Sciences, Campus of Zaragocilla ancient building Cread, Analytical Chemistry and Biomedicine Group, first floor No.103. Cra. 50 #24120, Cartagena, Colombia, AP 130015. **Phone number:** + 57 3015588298. **E-mail:** [erodriguezc1@unicartagena.edu.co](mailto:erodriguezc1@unicartagena.edu.co)

RUNNING HEAD

**Oxidative damage on *Plasmodium falciparum* proteome**



# Mascot Search Results

**Band** : 1.1  
**User** :  
**Email** :  
**Search title** : SampleSetID: 759, AnalysisID: 6308, MaldiWellID: 66567, SpectrumID: 144105, Path=\\171004\\MSMS\\17-112  
**Database** : NCBI nr 20120508 (17919084 sequences; 6150218869 residues) NCBI alveolata run 79 y 72  
**Taxonomy** : Plasmodium falciparum (malaria parasite) (19026 sequences)  
**Timestamp** : 30 Nov 2017 at 07:08:39 GMT  
**Warning** : A Peptide summary report will usually give a much clearer picture of MS/MS search results.  
**Top Score** : 112 for gi|237665430, rhoptry-associated protein 2 [Plasmodium falciparum]

## Mascot Score Histogram

Protein score is  $-10 \times \log(P)$ , where P is the probability that the observed match is a random event.

Protein scores greater than 55 are significant ( $p < 0.05$ ).

Protein scores are derived from ion scores as a non-probabilistic basis for ranking protein hits.

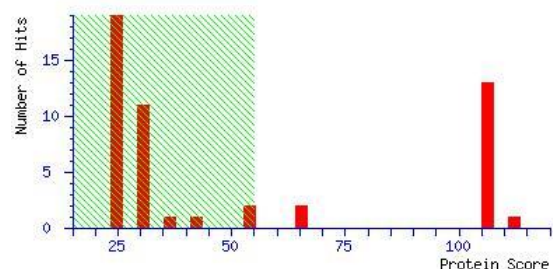

## Protein Summary Report

Format As  [Help](#)

Significance threshold  $p <$   Max. number of hits

## Index

| Accession                        | Mass     | Score | Description                                                                |
|----------------------------------|----------|-------|----------------------------------------------------------------------------|
| 1. <a href="#">gi 237665430</a>  | 43672112 |       | rhoptry-associated protein 2 [Plasmodium falciparum]                       |
| 2. <a href="#">gi 221326632</a>  | 41710105 |       | rhoptry-associated protein 2 [Plasmodium falciparum]                       |
| 3. <a href="#">gi 221326634</a>  | 41683105 |       | rhoptry-associated protein 2 [Plasmodium falciparum]                       |
| 4. <a href="#">gi 221326636</a>  | 41687105 |       | rhoptry-associated protein 2 [Plasmodium falciparum]                       |
| 5. <a href="#">gi 221326638</a>  | 41660105 |       | rhoptry-associated protein 2 [Plasmodium falciparum]                       |
| 6. <a href="#">gi 237665418</a>  | 41751105 |       | rhoptry-associated protein 2 [Plasmodium falciparum]                       |
| 7. <a href="#">gi 237665432</a>  | 41919105 |       | rhoptry-associated protein 2 [Plasmodium falciparum]                       |
| 8. <a href="#">gi 237665420</a>  | 42515105 |       | rhoptry-associated protein 2 [Plasmodium falciparum]                       |
| 9. <a href="#">gi 237665422</a>  | 42939105 |       | rhoptry-associated protein 2 [Plasmodium falciparum]                       |
| 10. <a href="#">gi 237665426</a> | 43018105 |       | rhoptry-associated protein 2 [Plasmodium falciparum]                       |
| 11. <a href="#">gi 237665424</a> | 43619105 |       | rhoptry-associated protein 2 [Plasmodium falciparum]                       |
| 12. <a href="#">gi 6118349</a>   | 47017    | 104   | rhoptry-associated protein 2 [Plasmodium falciparum]                       |
| 13. <a href="#">gi 124505955</a> | 46994104 |       | rhoptry-associated protein 2, RAP2 [Plasmodium falciparum 3D7]             |
| 14. <a href="#">gi 6683937</a>   | 47051    | 104   | rhoptry-associated protein 2 [Plasmodium falciparum]                       |
| 15. <a href="#">gi 10961</a>     | 47186    | 66    | RAP-2 [Plasmodium falciparum]                                              |
| 16. <a href="#">gi 237665428</a> | 4242464  |       | rhoptry-associated protein 2 [Plasmodium falciparum]                       |
| 17. <a href="#">gi 11125364</a>  | 55782    | 56    | protein disulfide isomerase [Plasmodium falciparum]                        |
| 18. <a href="#">gi 296005096</a> | 5582156  |       | protein disulfide isomerase [Plasmodium falciparum 3D7]                    |
| 19. <a href="#">gi 3036869</a>   | 354977   | 42    | NAD(P)H-dependent glutamate synthase [Plasmodium falciparum]               |
| 20. <a href="#">gi 124512690</a> | 19512535 |       | conserved Plasmodium protein, unknown function [Plasmodium falciparum 3D7] |

## Results List

|                                                                                                                                                                                                                                                                                                                                                                                                                                                                                                                                                                                                                                                                                                                                                                                                                          |                              |             |            |                  |                                         |
|--------------------------------------------------------------------------------------------------------------------------------------------------------------------------------------------------------------------------------------------------------------------------------------------------------------------------------------------------------------------------------------------------------------------------------------------------------------------------------------------------------------------------------------------------------------------------------------------------------------------------------------------------------------------------------------------------------------------------------------------------------------------------------------------------------------------------|------------------------------|-------------|------------|------------------|-----------------------------------------|
| 1.                                                                                                                                                                                                                                                                                                                                                                                                                                                                                                                                                                                                                                                                                                                                                                                                                       | <a href="#">gi 237665430</a> | Mass: 43672 | Score: 112 | Expect: 1.2e-007 | Matches: 6                              |
| rhoptry-associated protein 2 [Plasmodium falciparum]                                                                                                                                                                                                                                                                                                                                                                                                                                                                                                                                                                                                                                                                                                                                                                     |                              |             |            |                  |                                         |
|                                                                                                                                                                                                                                                                                                                                                                                                                                                                                                                                                                                                                                                                                                                                                                                                                          | Observed                     | Mr(expt)    | Mr(calc)   | ppm              | Start End Miss Ions Peptide             |
|                                                                                                                                                                                                                                                                                                                                                                                                                                                                                                                                                                                                                                                                                                                                                                                                                          | 1139.5815                    | 1138.5742   | 1138.5771  | -2.53            | 155 - 164 0 --- K.SNPYFIVGSR.V          |
|                                                                                                                                                                                                                                                                                                                                                                                                                                                                                                                                                                                                                                                                                                                                                                                                                          | 1139.5815                    | 1138.5742   | 1138.5771  | -2.53            | 155 - 164 0 38 K.SNPYFIVGSR.V           |
|                                                                                                                                                                                                                                                                                                                                                                                                                                                                                                                                                                                                                                                                                                                                                                                                                          | 1318.6443                    | 1317.6370   | 1317.6353  | 1.29             | 190 - 200 0 --- R.DYNFLIYAGSR.E         |
|                                                                                                                                                                                                                                                                                                                                                                                                                                                                                                                                                                                                                                                                                                                                                                                                                          | 1318.6443                    | 1317.6370   | 1317.6353  | 1.29             | 190 - 200 0 57 R.DYNFLIYAGSR.E          |
|                                                                                                                                                                                                                                                                                                                                                                                                                                                                                                                                                                                                                                                                                                                                                                                                                          | 2196.0725                    | 2195.0652   | 2195.0674  | -1.00            | 255 - 273 0 --- K.SEYGTDDLITSFFSIK.T    |
|                                                                                                                                                                                                                                                                                                                                                                                                                                                                                                                                                                                                                                                                                                                                                                                                                          | 2566.2903                    | 2565.2830   | 2565.3339  | -19.85           | 1 - 23 1 --- -.SKLPESNSLTGLIYAHTAHVHK.L |
| No match to: 1034.1162, 1050.0874, 1267.6982, 1267.6982, 1274.7203, 1274.7317, 1384.7184, 1384.7184, 1445.7601, 1479.7841, 1529.7374, 1563.7852, 1563.7852, 1567.7542, 1575.8081, 1638.8492, 1759.9475, 1759.9475, 1787.9674, 1790.9246, 1790.9246, 1815.9518, 1858.9628, 1877.0386, 1877.0386, 1881.0592, 1905.0511, 1906.8796, 1951.9500, 1971.0089, 1993.0059, 1993.0059, 1994.0392, 1998.9767, 2008.9969, 2042.1071, 2074.9429, 2107.2236, 2117.0906, 2138.1675, 2139.1616, 2185.0957, 2194.0574, 2202.1440, 2204.1467, 2219.1174, 2225.1460, 2228.1523, 2235.2080, 2251.1221, 2268.1711, 2282.1650, 2286.2263, 2286.2263, 2314.1519, 2325.2527, 2327.2517, 2330.1921, 2332.1497, 2501.2480, 2586.2400, 2612.1943, 2705.4258, 2726.3000, 2925.5957, 3052.6226, 3136.4932, 3153.4534, 3206.5691, 3211.4873, 3224.5742 |                              |             |            |                  |                                         |
| 2.                                                                                                                                                                                                                                                                                                                                                                                                                                                                                                                                                                                                                                                                                                                                                                                                                       | <a href="#">gi 221326632</a> | Mass: 41710 | Score: 105 | Expect: 6e-007   | Matches: 5                              |



rhoptry-associated protein 2 [Plasmodium falciparum]

| Observed  | Mr(expt)  | Mr(calc)  | ppm   | Start | End   | Miss | Ions | Peptide                 |
|-----------|-----------|-----------|-------|-------|-------|------|------|-------------------------|
| 1139.5815 | 1138.5742 | 1138.5771 | -2.53 | 151   | - 160 | 0    | ---  | K.SNPYFIVGSR.V          |
| 1139.5815 | 1138.5742 | 1138.5771 | -2.53 | 151   | - 160 | 0    | 38   | K.SNPYFIVGSR.V          |
| 1318.6443 | 1317.6370 | 1317.6353 | 1.29  | 186   | - 196 | 0    | ---  | R.DYNFLIYAGSR.E         |
| 1318.6443 | 1317.6370 | 1317.6353 | 1.29  | 186   | - 196 | 0    | 57   | R.DYNFLIYAGSR.E         |
| 2196.0725 | 2195.0652 | 2195.0674 | -1.00 | 251   | - 269 | 0    | ---  | K.SEYGTGPDLLITSFSSIIK.T |

No match to: 1034.1162, 1050.0874, 1267.6982, 1267.6982, 1274.7203, 1274.7317, 1384.7184, 1384.7184, 1445.7601, 1479.7841, 1529.7374, 1563.7852, 1563.7852, 1567.7542, 1575.8081, 1638.8492, 1759.9475, 1759.9475, 1787.9674, 1790.9246, 1790.9246, 1815.9518, 1858.9628, 1877.0386, 1877.0386, 1881.0592, 1905.0511, 1906.8796, 1951.9500, 1971.0089, 1993.0059, 1993.0059, 1994.0392, 1998.9767, 2008.9969, 2042.1071, 2074.9429, 2107.2236, 2117.0906, 2138.1675, 2139.1616, 2185.0957, 2194.0574, 2202.1440, 2204.1467, 2219.1174, 2225.1460, 2228.1523, 2235.2080, 2251.1221, 2268.1711, 2282.1650, 2286.2263, 2286.2263, 2314.1519, 2325.2527, 2327.2517, 2330.1921, 2332.1497, 2501.2480, 2566.2903, 2586.2400, 2612.1943, 2705.4258, 2726.3000, 2925.5957, 3052.6226, 3136.4932, 3153.4534, 3206.5691, 3211.4873, 3224.5742

3. [gi|221326634](#) Mass: 41683 Score: 105 Expect: 6e-007 Matches: 5

rhoptry-associated protein 2 [Plasmodium falciparum]

| Observed  | Mr(expt)  | Mr(calc)  | ppm   | Start | End   | Miss | Ions | Peptide                 |
|-----------|-----------|-----------|-------|-------|-------|------|------|-------------------------|
| 1139.5815 | 1138.5742 | 1138.5771 | -2.53 | 151   | - 160 | 0    | ---  | K.SNPYFIVGSR.V          |
| 1139.5815 | 1138.5742 | 1138.5771 | -2.53 | 151   | - 160 | 0    | 38   | K.SNPYFIVGSR.V          |
| 1318.6443 | 1317.6370 | 1317.6353 | 1.29  | 186   | - 196 | 0    | ---  | R.DYNFLIYAGSR.E         |
| 1318.6443 | 1317.6370 | 1317.6353 | 1.29  | 186   | - 196 | 0    | 57   | R.DYNFLIYAGSR.E         |
| 2196.0725 | 2195.0652 | 2195.0674 | -1.00 | 251   | - 269 | 0    | ---  | K.SEYGTGPDLLITSFSSIIK.T |

No match to: 1034.1162, 1050.0874, 1267.6982, 1267.6982, 1274.7203, 1274.7317, 1384.7184, 1384.7184, 1445.7601, 1479.7841, 1529.7374, 1563.7852, 1563.7852, 1567.7542, 1575.8081, 1638.8492, 1759.9475, 1759.9475, 1787.9674, 1790.9246, 1790.9246, 1815.9518, 1858.9628, 1877.0386, 1877.0386, 1881.0592, 1905.0511, 1906.8796, 1951.9500, 1971.0089, 1993.0059, 1993.0059, 1994.0392, 1998.9767, 2008.9969, 2042.1071, 2074.9429, 2107.2236, 2117.0906, 2138.1675, 2139.1616, 2185.0957, 2194.0574, 2202.1440, 2204.1467, 2219.1174, 2225.1460, 2228.1523, 2235.2080, 2251.1221, 2268.1711, 2282.1650, 2286.2263, 2286.2263, 2314.1519, 2325.2527, 2327.2517, 2330.1921, 2332.1497, 2501.2480, 2566.2903, 2586.2400, 2612.1943, 2705.4258, 2726.3000, 2925.5957, 3052.6226, 3136.4932, 3153.4534, 3206.5691, 3211.4873, 3224.5742

4. [gi|221326636](#) Mass: 41687 Score: 105 Expect: 6e-007 Matches: 5

rhoptry-associated protein 2 [Plasmodium falciparum]

| Observed  | Mr(expt)  | Mr(calc)  | ppm   | Start | End   | Miss | Ions | Peptide                 |
|-----------|-----------|-----------|-------|-------|-------|------|------|-------------------------|
| 1139.5815 | 1138.5742 | 1138.5771 | -2.53 | 151   | - 160 | 0    | ---  | K.SNPYFIVGSR.V          |
| 1139.5815 | 1138.5742 | 1138.5771 | -2.53 | 151   | - 160 | 0    | 38   | K.SNPYFIVGSR.V          |
| 1318.6443 | 1317.6370 | 1317.6353 | 1.29  | 186   | - 196 | 0    | ---  | R.DYNFLIYAGSR.E         |
| 1318.6443 | 1317.6370 | 1317.6353 | 1.29  | 186   | - 196 | 0    | 57   | R.DYNFLIYAGSR.E         |
| 2196.0725 | 2195.0652 | 2195.0674 | -1.00 | 251   | - 269 | 0    | ---  | K.SEYGTGPDLLITSFSSIIK.T |

No match to: 1034.1162, 1050.0874, 1267.6982, 1267.6982, 1274.7203, 1274.7317, 1384.7184, 1384.7184, 1445.7601, 1479.7841, 1529.7374, 1563.7852, 1563.7852, 1567.7542, 1575.8081, 1638.8492, 1759.9475, 1759.9475, 1787.9674, 1790.9246, 1790.9246, 1815.9518, 1858.9628, 1877.0386, 1877.0386, 1881.0592, 1905.0511, 1906.8796, 1951.9500, 1971.0089, 1993.0059, 1993.0059, 1994.0392, 1998.9767, 2008.9969, 2042.1071, 2074.9429, 2107.2236, 2117.0906, 2138.1675, 2139.1616, 2185.0957, 2194.0574, 2202.1440, 2204.1467, 2219.1174, 2225.1460, 2228.1523, 2235.2080, 2251.1221, 2268.1711, 2282.1650, 2286.2263, 2286.2263, 2314.1519, 2325.2527, 2327.2517, 2330.1921, 2332.1497, 2501.2480, 2566.2903, 2586.2400, 2612.1943, 2705.4258, 2726.3000, 2925.5957, 3052.6226, 3136.4932, 3153.4534, 3206.5691, 3211.4873, 3224.5742

5. [gi|221326638](#) Mass: 41660 Score: 105 Expect: 6e-007 Matches: 5

rhoptry-associated protein 2 [Plasmodium falciparum]

| Observed  | Mr(expt)  | Mr(calc)  | ppm   | Start | End   | Miss | Ions | Peptide                 |
|-----------|-----------|-----------|-------|-------|-------|------|------|-------------------------|
| 1139.5815 | 1138.5742 | 1138.5771 | -2.53 | 151   | - 160 | 0    | ---  | K.SNPYFIVGSR.V          |
| 1139.5815 | 1138.5742 | 1138.5771 | -2.53 | 151   | - 160 | 0    | 38   | K.SNPYFIVGSR.V          |
| 1318.6443 | 1317.6370 | 1317.6353 | 1.29  | 186   | - 196 | 0    | ---  | R.DYNFLIYAGSR.E         |
| 1318.6443 | 1317.6370 | 1317.6353 | 1.29  | 186   | - 196 | 0    | 57   | R.DYNFLIYAGSR.E         |
| 2196.0725 | 2195.0652 | 2195.0674 | -1.00 | 251   | - 269 | 0    | ---  | K.SEYGTGPDLLITSFSSIIK.T |

No match to: 1034.1162, 1050.0874, 1267.6982, 1267.6982, 1274.7203, 1274.7317, 1384.7184, 1384.7184, 1445.7601, 1479.7841, 1529.7374, 1563.7852, 1563.7852, 1567.7542, 1575.8081, 1638.8492, 1759.9475, 1759.9475, 1787.9674, 1790.9246, 1790.9246, 1815.9518, 1858.9628, 1877.0386, 1877.0386, 1881.0592, 1905.0511, 1906.8796, 1951.9500, 1971.0089, 1993.0059, 1993.0059, 1994.0392, 1998.9767, 2008.9969, 2042.1071, 2074.9429, 2107.2236, 2117.0906, 2138.1675, 2139.1616, 2185.0957, 2194.0574, 2202.1440, 2204.1467, 2219.1174, 2225.1460, 2228.1523, 2235.2080, 2251.1221, 2268.1711, 2282.1650, 2286.2263, 2286.2263, 2314.1519, 2325.2527, 2327.2517, 2330.1921, 2332.1497, 2501.2480, 2566.2903, 2586.2400, 2612.1943, 2705.4258, 2726.3000, 2925.5957, 3052.6226, 3136.4932, 3153.4534, 3206.5691, 3211.4873, 3224.5742

6. [gi|237665418](#) Mass: 41751 Score: 105 Expect: 6e-007 Matches: 5

rhoptry-associated protein 2 [Plasmodium falciparum]

| Observed  | Mr(expt)  | Mr(calc)  | ppm   | Start | End   | Miss | Ions | Peptide                 |
|-----------|-----------|-----------|-------|-------|-------|------|------|-------------------------|
| 1139.5815 | 1138.5742 | 1138.5771 | -2.53 | 147   | - 156 | 0    | ---  | K.SNPYFIVGSR.V          |
| 1139.5815 | 1138.5742 | 1138.5771 | -2.53 | 147   | - 156 | 0    | 38   | K.SNPYFIVGSR.V          |
| 1318.6443 | 1317.6370 | 1317.6353 | 1.29  | 182   | - 192 | 0    | ---  | R.DYNFLIYAGSR.E         |
| 1318.6443 | 1317.6370 | 1317.6353 | 1.29  | 182   | - 192 | 0    | 57   | R.DYNFLIYAGSR.E         |
| 2196.0725 | 2195.0652 | 2195.0674 | -1.00 | 247   | - 265 | 0    | ---  | K.SEYGTGPDLLITSFSSIIK.T |

No match to: 1034.1162, 1050.0874, 1267.6982, 1267.6982, 1274.7203, 1274.7317, 1384.7184, 1384.7184, 1445.7601, 1479.7841, 1529.7374, 1563.7852, 1563.7852, 1567.7542, 1575.8081, 1638.8492, 1759.9475, 1759.9475, 1787.9674, 1790.9246, 1790.9246, 1815.9518, 1858.9628, 1877.0386, 1877.0386, 1881.0592, 1905.0511, 1906.8796, 1951.9500, 1971.0089, 1993.0059, 1993.0059, 1994.0392, 1998.9767, 2008.9969, 2042.1071, 2074.9429, 2107.2236, 2117.0906, 2138.1675, 2139.1616, 2185.0957, 2194.0574, 2202.1440, 2204.1467, 2219.1174, 2225.1460, 2228.1523, 2235.2080, 2251.1221, 2268.1711, 2282.1650, 2286.2263, 2286.2263, 2314.1519, 2325.2527, 2327.2517, 2330.1921, 2332.1497, 2501.2480, 2566.2903, 2586.2400, 2612.1943, 2705.4258, 2726.3000, 2925.5957, 3052.6226, 3136.4932, 3153.4534, 3206.5691, 3211.4873, 3224.5742

7. [gi|237665432](#) Mass: 41919 Score: 105 Expect: 6e-007 Matches: 5

rhoptry-associated protein 2 [Plasmodium falciparum]

| Observed  | Mr(expt)  | Mr(calc)  | ppm   | Start | End   | Miss | Ions | Peptide        |
|-----------|-----------|-----------|-------|-------|-------|------|------|----------------|
| 1139.5815 | 1138.5742 | 1138.5771 | -2.53 | 146   | - 155 | 0    | ---  | K.SNPYFIVGSR.V |



1139.5815 1138.5742 1138.5771 -2.53 146 - 155 0 38 K.SNPYFIVGSR.V  
1318.6443 1317.6370 1317.6353 1.29 181 - 191 0 --- R.DYNFLIYAGSR.E  
1318.6443 1317.6370 1317.6353 1.29 181 - 191 0 57 R.DYNFLIYAGSR.E  
2196.0725 2195.0652 2195.0674 -1.00 246 - 264 0 --- K.SEYGTGTPDDLITSSFFSIK.T  
No match to: 1034.1162, 1050.0874, 1267.6982, 1267.6982, 1274.7203, 1274.7317, 1384.7184, 1384.7184, 1445.7601, 1479.7841, 1529.7374, 1563.7852, 1563.7852, 1567.7542, 1575.8081, 1638.8492, 1759.9475, 1759.9475, 1787.9674, 1790.9246, 1790.9246, 1815.9518, 1858.9628, 1877.0386, 1877.0386, 1881.0592, 1905.0511, 1906.8796, 1951.9500, 1971.0089, 1993.0059, 1993.0059, 1994.0392, 1998.9767, 2008.9969, 2042.1071, 2074.9429, 2107.2236, 2117.0906, 2138.1675, 2139.1616, 2185.0957, 2194.0574, 2202.1440, 2204.1467, 2219.1174, 2225.1460, 2228.1523, 2235.2080, 2251.1221, 2268.1711, 2282.1650, 2286.2263, 2286.2263, 2314.1519, 2325.2527, 2327.2517, 2330.1921, 2332.1497, 2501.2480, 2566.2903, 2586.2400, 2612.1943, 2705.4258, 2726.3000, 2925.5957, 3052.6226, 3136.4932, 3153.4534, 3206.5691, 3211.4873, 3224.5742

8. [gi|237665420](#) Mass: 42515 Score: 105 Expect: 6e-007 Matches: 5

rhoptry-associated protein 2 [Plasmodium falciparum]

| Observed  | Mr(expt)  | Mr(calc)  | ppm   | StartEnd | Miss | IonsPeptide                    |
|-----------|-----------|-----------|-------|----------|------|--------------------------------|
| 1139.5815 | 1138.5742 | 1138.5771 | -2.53 | 149-     | 158  | 0 --- K.SNPYFIVGSR.V           |
| 1139.5815 | 1138.5742 | 1138.5771 | -2.53 | 149-     | 158  | 0 38 K.SNPYFIVGSR.V            |
| 1318.6443 | 1317.6370 | 1317.6353 | 1.29  | 184-     | 194  | 0 --- R.DYNFLIYAGSR.E          |
| 1318.6443 | 1317.6370 | 1317.6353 | 1.29  | 184-     | 194  | 0 57 R.DYNFLIYAGSR.E           |
| 2196.0725 | 2195.0652 | 2195.0674 | -1.00 | 249-     | 267  | 0 --- K.SEYGTGTPDDLITSSFFSIK.T |

No match to: 1034.1162, 1050.0874, 1267.6982, 1267.6982, 1274.7203, 1274.7317, 1384.7184, 1384.7184, 1445.7601, 1479.7841, 1529.7374, 1563.7852, 1563.7852, 1567.7542, 1575.8081, 1638.8492, 1759.9475, 1759.9475, 1787.9674, 1790.9246, 1790.9246, 1815.9518, 1858.9628, 1877.0386, 1877.0386, 1881.0592, 1905.0511, 1906.8796, 1951.9500, 1971.0089, 1993.0059, 1993.0059, 1994.0392, 1998.9767, 2008.9969, 2042.1071, 2074.9429, 2107.2236, 2117.0906, 2138.1675, 2139.1616, 2185.0957, 2194.0574, 2202.1440, 2204.1467, 2219.1174, 2225.1460, 2228.1523, 2235.2080, 2251.1221, 2268.1711, 2282.1650, 2286.2263, 2286.2263, 2314.1519, 2325.2527, 2327.2517, 2330.1921, 2332.1497, 2501.2480, 2566.2903, 2586.2400, 2612.1943, 2705.4258, 2726.3000, 2925.5957, 3052.6226, 3136.4932, 3153.4534, 3206.5691, 3211.4873, 3224.5742

9. [gi|237665422](#) Mass: 42939 Score: 105 Expect: 6e-007 Matches: 5

rhoptry-associated protein 2 [Plasmodium falciparum]

| Observed  | Mr(expt)  | Mr(calc)  | ppm   | StartEnd | Miss | IonsPeptide                    |
|-----------|-----------|-----------|-------|----------|------|--------------------------------|
| 1139.5815 | 1138.5742 | 1138.5771 | -2.53 | 152-     | 161  | 0 --- K.SNPYFIVGSR.V           |
| 1139.5815 | 1138.5742 | 1138.5771 | -2.53 | 152-     | 161  | 0 38 K.SNPYFIVGSR.V            |
| 1318.6443 | 1317.6370 | 1317.6353 | 1.29  | 187-     | 197  | 0 --- R.DYNFLIYAGSR.E          |
| 1318.6443 | 1317.6370 | 1317.6353 | 1.29  | 187-     | 197  | 0 57 R.DYNFLIYAGSR.E           |
| 2196.0725 | 2195.0652 | 2195.0674 | -1.00 | 252-     | 270  | 0 --- K.SEYGTGTPDDLITSSFFSIK.T |

No match to: 1034.1162, 1050.0874, 1267.6982, 1267.6982, 1274.7203, 1274.7317, 1384.7184, 1384.7184, 1445.7601, 1479.7841, 1529.7374, 1563.7852, 1563.7852, 1567.7542, 1575.8081, 1638.8492, 1759.9475, 1759.9475, 1787.9674, 1790.9246, 1790.9246, 1815.9518, 1858.9628, 1877.0386, 1877.0386, 1881.0592, 1905.0511, 1906.8796, 1951.9500, 1971.0089, 1993.0059, 1993.0059, 1994.0392, 1998.9767, 2008.9969, 2042.1071, 2074.9429, 2107.2236, 2117.0906, 2138.1675, 2139.1616, 2185.0957, 2194.0574, 2202.1440, 2204.1467, 2219.1174, 2225.1460, 2228.1523, 2235.2080, 2251.1221, 2268.1711, 2282.1650, 2286.2263, 2314.1519, 2325.2527, 2327.2517, 2330.1921, 2332.1497, 2501.2480, 2566.2903, 2586.2400, 2612.1943, 2705.4258, 2726.3000, 2925.5957, 3052.6226, 3136.4932, 3153.4534, 3206.5691, 3211.4873, 3224.5742

10. [gi|237665426](#) Mass: 43018 Score: 105 Expect: 6e-007 Matches: 5

rhoptry-associated protein 2 [Plasmodium falciparum]

| Observed  | Mr(expt)  | Mr(calc)  | ppm   | StartEnd | Miss | IonsPeptide                    |
|-----------|-----------|-----------|-------|----------|------|--------------------------------|
| 1139.5815 | 1138.5742 | 1138.5771 | -2.53 | 152-     | 161  | 0 --- K.SNPYFIVGSR.V           |
| 1139.5815 | 1138.5742 | 1138.5771 | -2.53 | 152-     | 161  | 0 38 K.SNPYFIVGSR.V            |
| 1318.6443 | 1317.6370 | 1317.6353 | 1.29  | 187-     | 197  | 0 --- R.DYNFLIYAGSR.E          |
| 1318.6443 | 1317.6370 | 1317.6353 | 1.29  | 187-     | 197  | 0 57 R.DYNFLIYAGSR.E           |
| 2196.0725 | 2195.0652 | 2195.0674 | -1.00 | 252-     | 270  | 0 --- K.SEYGTGTPDDLITSSFFSIK.T |

No match to: 1034.1162, 1050.0874, 1267.6982, 1267.6982, 1274.7203, 1274.7317, 1384.7184, 1384.7184, 1445.7601, 1479.7841, 1529.7374, 1563.7852, 1563.7852, 1567.7542, 1575.8081, 1638.8492, 1759.9475, 1759.9475, 1787.9674, 1790.9246, 1790.9246, 1815.9518, 1858.9628, 1877.0386, 1877.0386, 1881.0592, 1905.0511, 1906.8796, 1951.9500, 1971.0089, 1993.0059, 1993.0059, 1994.0392, 1998.9767, 2008.9969, 2042.1071, 2074.9429, 2107.2236, 2117.0906, 2138.1675, 2139.1616, 2185.0957, 2194.0574, 2202.1440, 2204.1467, 2219.1174, 2225.1460, 2228.1523, 2235.2080, 2251.1221, 2268.1711, 2282.1650, 2286.2263, 2286.2263, 2314.1519, 2325.2527, 2327.2517, 2330.1921, 2332.1497, 2501.2480, 2566.2903, 2586.2400, 2612.1943, 2705.4258, 2726.3000, 2925.5957, 3052.6226, 3136.4932, 3153.4534, 3206.5691, 3211.4873, 3224.5742

11. [gi|237665424](#) Mass: 43619 Score: 105 Expect: 6e-007 Matches: 5

rhoptry-associated protein 2 [Plasmodium falciparum]

| Observed  | Mr(expt)  | Mr(calc)  | ppm   | StartEnd | Miss | IonsPeptide                    |
|-----------|-----------|-----------|-------|----------|------|--------------------------------|
| 1139.5815 | 1138.5742 | 1138.5771 | -2.53 | 154-     | 163  | 0 --- K.SNPYFIVGSR.V           |
| 1139.5815 | 1138.5742 | 1138.5771 | -2.53 | 154-     | 163  | 0 38 K.SNPYFIVGSR.V            |
| 1318.6443 | 1317.6370 | 1317.6353 | 1.29  | 189-     | 199  | 0 --- R.DYNFLIYAGSR.E          |
| 1318.6443 | 1317.6370 | 1317.6353 | 1.29  | 189-     | 199  | 0 57 R.DYNFLIYAGSR.E           |
| 2196.0725 | 2195.0652 | 2195.0674 | -1.00 | 254-     | 272  | 0 --- K.SEYGTGTPDDLITSSFFSIK.T |

No match to: 1034.1162, 1050.0874, 1267.6982, 1267.6982, 1274.7203, 1274.7317, 1384.7184, 1384.7184, 1445.7601, 1479.7841, 1529.7374, 1563.7852, 1563.7852, 1567.7542, 1575.8081, 1638.8492, 1759.9475, 1759.9475, 1787.9674, 1790.9246, 1790.9246, 1815.9518, 1858.9628, 1877.0386, 1877.0386, 1881.0592, 1905.0511, 1906.8796, 1951.9500, 1971.0089, 1993.0059, 1993.0059, 1994.0392, 1998.9767, 2008.9969, 2042.1071, 2074.9429, 2107.2236, 2117.0906, 2138.1675, 2139.1616, 2185.0957, 2194.0574, 2202.1440, 2204.1467, 2219.1174, 2225.1460, 2228.1523, 2235.2080, 2251.1221, 2268.1711, 2282.1650, 2286.2263, 2286.2263, 2314.1519, 2325.2527, 2327.2517, 2330.1921, 2332.1497, 2501.2480, 2566.2903, 2586.2400, 2612.1943, 2705.4258, 2726.3000, 2925.5957, 3052.6226, 3136.4932, 3153.4534, 3206.5691, 3211.4873, 3224.5742

12. [gi|6118349](#) Mass: 47017 Score: 104 Expect: 7.6e-007 Matches: 5

rhoptry-associated protein 2 [Plasmodium falciparum]

| Observed  | Mr(expt)  | Mr(calc)  | ppm   | Start | End | Miss | IonsPeptide           |
|-----------|-----------|-----------|-------|-------|-----|------|-----------------------|
| 1139.5815 | 1138.5742 | 1138.5771 | -2.53 | 183   | -   | 192  | 0 --- K.SNPYFIVGSR.V  |
| 1139.5815 | 1138.5742 | 1138.5771 | -2.53 | 183   | -   | 192  | 0 38 K.SNPYFIVGSR.V   |
| 1318.6443 | 1317.6370 | 1317.6353 | 1.29  | 218   | -   | 228  | 0 --- R.DYNFLIYAGSR.E |
| 1318.6443 | 1317.6370 | 1317.6353 | 1.29  | 218   | -   | 228  | 0 57 R.DYNFLIYAGSR.E  |



2196.0725 2195.0652 2195.0674 -1.00 283- 301 0 --- K.SEYGTGTPDDLITSFSSIIK.T

No match to: 1034.1162, 1050.0874, 1267.6982, 1267.6982, 1274.7203, 1274.7317, 1384.7184, 1384.7184, 1445.7601, 1479.7841, 1529.7374, 1563.7852, 1563.7852, 1567.7542, 1575.8081, 1638.8492, 1759.9475, 1759.9475, 1787.9674, 1790.9246, 1790.9246, 1815.9518, 1858.9628, 1877.0386, 1877.0386, 1881.0592, 1905.0511, 1906.8796, 1951.9500, 1971.0089, 1993.0059, 1993.0059, 1994.0392, 1998.9767, 2008.9969, 2042.1071, 2074.9429, 2107.2236, 2117.0906, 2138.1675, 2139.1616, 2185.0957, 2194.0574, 2202.1440, 2204.1467, 2219.1174, 2225.1460, 2228.1523, 2235.2080, 2251.1221, 2268.1711, 2282.1650, 2286.2263, 2286.2263, 2314.1519, 2325.2527, 2327.2517, 2330.1921, 2332.1497, 2501.2480, 2566.2903, 2586.2400, 2612.1943, 2705.4258, 2726.3000, 2925.5957, 3052.6226, 3136.4932, 3153.4534, 3206.5691, 3211.4873, 3224.5742

13. [gi|124505955](#) Mass: 46994 Score: 104 Expect: 7.6e-007 Matches: 5  
 rhoptry-associated protein 2, RAP2 [Plasmodium falciparum 3D7]

| Observed  | Mr(expt)  | Mr(calc)  | ppm   | Start | End   | Miss | Ions | Peptide                  |
|-----------|-----------|-----------|-------|-------|-------|------|------|--------------------------|
| 1139.5815 | 1138.5742 | 1138.5771 | -2.53 | 183   | - 192 | 0    | ---  | K.SNPYFIVGSR.V           |
| 1139.5815 | 1138.5742 | 1138.5771 | -2.53 | 183   | - 192 | 0    | 38   | K.SNPYFIVGSR.V           |
| 1318.6443 | 1317.6370 | 1317.6353 | 1.29  | 218   | - 228 | 0    | ---  | R.DYNFLIYAGSR.E          |
| 1318.6443 | 1317.6370 | 1317.6353 | 1.29  | 218   | - 228 | 0    | 57   | R.DYNFLIYAGSR.E          |
| 2196.0725 | 2195.0652 | 2195.0674 | -1.00 | 283   | - 301 | 0    | ---  | K.SEYGTGTPDDLITSFSSIIK.T |

No match to: 1034.1162, 1050.0874, 1267.6982, 1267.6982, 1274.7203, 1274.7317, 1384.7184, 1384.7184, 1445.7601, 1479.7841, 1529.7374, 1563.7852, 1563.7852, 1567.7542, 1575.8081, 1638.8492, 1759.9475, 1759.9475, 1787.9674, 1790.9246, 1790.9246, 1815.9518, 1858.9628, 1877.0386, 1877.0386, 1881.0592, 1905.0511, 1906.8796, 1951.9500, 1971.0089, 1993.0059, 1993.0059, 1994.0392, 1998.9767, 2008.9969, 2042.1071, 2074.9429, 2107.2236, 2117.0906, 2138.1675, 2139.1616, 2185.0957, 2194.0574, 2202.1440, 2204.1467, 2219.1174, 2225.1460, 2228.1523, 2235.2080, 2251.1221, 2268.1711, 2282.1650, 2286.2263, 2286.2263, 2314.1519, 2325.2527, 2327.2517, 2330.1921, 2332.1497, 2501.2480, 2566.2903, 2586.2400, 2612.1943, 2705.4258, 2726.3000, 2925.5957, 3052.6226, 3136.4932, 3153.4534, 3206.5691, 3211.4873, 3224.5742

14. [gi|6683937](#) Mass: 47051 Score: 104 Expect: 7.6e-007 Matches: 5  
 rhoptry-associated protein 2 [Plasmodium falciparum]

| Observed  | Mr(expt)  | Mr(calc)  | ppm   | Start | End   | Miss | Ions | Peptide                  |
|-----------|-----------|-----------|-------|-------|-------|------|------|--------------------------|
| 1139.5815 | 1138.5742 | 1138.5771 | -2.53 | 183   | - 192 | 0    | ---  | K.SNPYFIVGSR.V           |
| 1139.5815 | 1138.5742 | 1138.5771 | -2.53 | 183   | - 192 | 0    | 38   | K.SNPYFIVGSR.V           |
| 1318.6443 | 1317.6370 | 1317.6353 | 1.29  | 218   | - 228 | 0    | ---  | R.DYNFLIYAGSR.E          |
| 1318.6443 | 1317.6370 | 1317.6353 | 1.29  | 218   | - 228 | 0    | 57   | R.DYNFLIYAGSR.E          |
| 2196.0725 | 2195.0652 | 2195.0674 | -1.00 | 283   | - 301 | 0    | ---  | K.SEYGTGTPDDLITSFSSIIK.T |

No match to: 1034.1162, 1050.0874, 1267.6982, 1267.6982, 1274.7203, 1274.7317, 1384.7184, 1384.7184, 1445.7601, 1479.7841, 1529.7374, 1563.7852, 1563.7852, 1567.7542, 1575.8081, 1638.8492, 1759.9475, 1759.9475, 1787.9674, 1790.9246, 1790.9246, 1815.9518, 1858.9628, 1877.0386, 1877.0386, 1881.0592, 1905.0511, 1906.8796, 1951.9500, 1971.0089, 1993.0059, 1993.0059, 1994.0392, 1998.9767, 2008.9969, 2042.1071, 2074.9429, 2107.2236, 2117.0906, 2138.1675, 2139.1616, 2185.0957, 2194.0574, 2202.1440, 2204.1467, 2219.1174, 2225.1460, 2228.1523, 2235.2080, 2251.1221, 2268.1711, 2282.1650, 2286.2263, 2286.2263, 2314.1519, 2325.2527, 2327.2517, 2330.1921, 2332.1497, 2501.2480, 2566.2903, 2586.2400, 2612.1943, 2705.4258, 2726.3000, 2925.5957, 3052.6226, 3136.4932, 3153.4534, 3206.5691, 3211.4873, 3224.5742

15. [gi|10961](#) Mass: 47186 Score: 66 Expect: 0.0046 Matches: 5  
 RAP-2 [Plasmodium falciparum]

| Observed  | Mr(expt)  | Mr(calc)  | ppm   | Start | End   | Miss | Ions | Peptide                  |
|-----------|-----------|-----------|-------|-------|-------|------|------|--------------------------|
| 1274.7203 | 1273.7130 | 1273.6567 | 44.2  | 183   | - 192 | 1    | ---  | K.YNRYFIVGSR.V           |
| 1274.7317 | 1273.7244 | 1273.6567 | 53.1  | 183   | - 192 | 1    | ---  | K.YNRYFIVGSR.V           |
| 1318.6443 | 1317.6370 | 1317.6353 | 1.29  | 218   | - 228 | 0    | ---  | R.DYNFLIYAGSR.E          |
| 1318.6443 | 1317.6370 | 1317.6353 | 1.29  | 218   | - 228 | 0    | 57   | R.DYNFLIYAGSR.E          |
| 2196.0725 | 2195.0652 | 2195.0674 | -1.00 | 283   | - 301 | 0    | ---  | K.SEYGTGTPDDLITSFSSIIK.T |

No match to: 1034.1162, 1050.0874, 1139.5815, 1139.5815, 1267.6982, 1267.6982, 1384.7184, 1384.7184, 1445.7601, 1479.7841, 1529.7374, 1563.7852, 1563.7852, 1567.7542, 1575.8081, 1638.8492, 1759.9475, 1759.9475, 1787.9674, 1790.9246, 1790.9246, 1815.9518, 1858.9628, 1877.0386, 1877.0386, 1881.0592, 1905.0511, 1906.8796, 1951.9500, 1971.0089, 1993.0059, 1993.0059, 1994.0392, 1998.9767, 2008.9969, 2042.1071, 2074.9429, 2107.2236, 2117.0906, 2138.1675, 2139.1616, 2185.0957, 2194.0574, 2202.1440, 2204.1467, 2219.1174, 2225.1460, 2228.1523, 2235.2080, 2251.1221, 2268.1711, 2282.1650, 2286.2263, 2286.2263, 2314.1519, 2325.2527, 2327.2517, 2330.1921, 2332.1497, 2501.2480, 2566.2903, 2586.2400, 2612.1943, 2705.4258, 2726.3000, 2925.5957, 3052.6226, 3136.4932, 3153.4534, 3206.5691, 3211.4873, 3224.5742

16. [gi|237665428](#) Mass: 42424 Score: 64 Expect: 0.0085 Matches: 3  
 rhoptry-associated protein 2 [Plasmodium falciparum]

| Observed  | Mr(expt)  | Mr(calc)  | ppm   | Start | End   | Miss | Ions | Peptide                  |
|-----------|-----------|-----------|-------|-------|-------|------|------|--------------------------|
| 1318.6443 | 1317.6370 | 1317.6353 | 1.29  | 182   | - 192 | 0    | ---  | R.DYNFLIYAGSR.E          |
| 1318.6443 | 1317.6370 | 1317.6353 | 1.29  | 182   | - 192 | 0    | 57   | R.DYNFLIYAGSR.E          |
| 2196.0725 | 2195.0652 | 2195.0674 | -1.00 | 247   | - 265 | 0    | ---  | K.SEYGTGTPDDLITSFSSIIK.T |

No match to: 1034.1162, 1050.0874, 1139.5815, 1139.5815, 1267.6982, 1267.6982, 1274.7203, 1274.7317, 1384.7184, 1384.7184, 1445.7601, 1479.7841, 1529.7374, 1563.7852, 1563.7852, 1567.7542, 1575.8081, 1638.8492, 1759.9475, 1759.9475, 1787.9674, 1790.9246, 1790.9246, 1815.9518, 1858.9628, 1877.0386, 1877.0386, 1881.0592, 1905.0511, 1906.8796, 1951.9500, 1971.0089, 1993.0059, 1993.0059, 1994.0392, 1998.9767, 2008.9969, 2042.1071, 2074.9429, 2107.2236, 2117.0906, 2138.1675, 2139.1616, 2185.0957, 2194.0574, 2202.1440, 2204.1467, 2219.1174, 2225.1460, 2228.1523, 2235.2080, 2251.1221, 2268.1711, 2282.1650, 2286.2263, 2286.2263, 2314.1519, 2325.2527, 2327.2517, 2330.1921, 2332.1497, 2501.2480, 2566.2903, 2586.2400, 2612.1943, 2705.4258, 2726.3000, 2925.5957, 3052.6226, 3136.4932, 3153.4534, 3206.5691, 3211.4873, 3224.5742

17. [gi|11125364](#) Mass: 55782 Score: 56 Expect: 0.047 Matches: 12  
 protein disulfide isomerase [Plasmodium falciparum]

| Observed  | Mr(expt)  | Mr(calc)  | ppm    | Start | End   | Miss | Ions | Peptide                 |
|-----------|-----------|-----------|--------|-------|-------|------|------|-------------------------|
| 1267.6982 | 1266.6909 | 1266.6972 | -4.97  | 450   | - 460 | 1    | ---  | R.SLKGFDVFLNK.H         |
| 1267.6982 | 1266.6909 | 1266.6972 | -4.97  | 450   | - 460 | 1    | ---  | R.SLKGFDVFLNK.H         |
| 1318.6443 | 1317.6370 | 1317.6928 | -42.36 | 390   | - 400 | 1    | ---  | K.LEPVYEDLGRK.L         |
| 1318.6443 | 1317.6370 | 1317.6928 | -42.36 | 389   | - 399 | 1    | ---  | K.KLEPVYEDLGRK.K        |
| 1877.0386 | 1876.0313 | 1875.9400 | 48.7   | 66    | - 81  | 1    | ---  | R.LIPEYNEAANMLNEKK.S    |
| 1877.0386 | 1876.0313 | 1875.9400 | 48.7   | 66    | - 81  | 1    | ---  | R.LIPEYNEAANMLNEKK.S    |
| 1905.0511 | 1904.0438 | 1903.9461 | 51.3   | 65    | - 80  | 1    | ---  | K.RLIPEYNEAANMLNEK.K    |
| 1994.0392 | 1993.0319 | 1992.9905 | 20.8   | 292   | - 310 | 0    | ---  | K.ASLGLTEFPGLAFQSNRGR.Y |
| 1998.9767 | 1997.9694 | 1998.0686 | -49.66 | 315   | - 331 | 1    | ---  | K.NPKESLLNHNAIINFFK.D   |



2282.1650 2281.1577 2281.0595 43.1 48 - 65 1 --- K.NDIVLVMFYAPWCGHCKR.L + Oxidation (M)  
2325.2527 2324.2454 2324.1212 53.4 157 - 175 1 --- K.INVAFYLEYTSEDNDLYKK.F  
2566.2903 2565.2830 2565.2322 19.8 247 - 266 1 --- K.ELVWVCATYEQYNEIKEHVR.L  
No match to: 1034.1162, 1050.0874, 1139.5815, 1139.5815, 1274.7203, 1274.7317, 1384.7184, 1384.7184, 1445.7601, 1479.7841, 1529.7374, 1563.7852, 1563.7852, 1567.7542, 1575.8081, 1638.8492, 1759.9475, 1759.9475, 1787.9674, 1790.9246, 1790.9246, 1815.9518, 1858.9628, 1881.0592, 1906.8796, 1951.9500, 1971.0089, 1993.0059, 1993.0059, 2008.9969, 2042.1071, 2074.9429, 2107.2236, 2117.0906, 2138.1675, 2139.1616, 2185.0957, 2194.0574, 2196.0725, 2202.1440, 2204.1467, 2219.1174, 2225.1460, 2228.1523, 2235.2080, 2251.1221, 2268.1711, 2286.2263, 2286.2263, 2314.1519, 2327.2517, 2330.1921, 2332.1497, 2501.2480, 2586.2400, 2612.1943, 2705.4258, 2726.3000, 2925.5957, 3052.6226, 3136.4932, 3153.4534, 3206.5691, 3211.4873, 3224.5742

18. [gi|296005096](#) Mass: 55821 Score: 56 Expect: 0.047 Matches: 12

protein disulfide isomerase [Plasmodium falciparum 3D7]  
Observed Mr(expt) Mr(calc) ppm Start End MissIons Peptide  
1267.6982 1266.6909 1266.6972 -4.97 450 - 460 1 --- R.SLKGFVDFLNK.H  
1267.6982 1266.6909 1266.6972 -4.97 450 - 460 1 --- R.SLKGFVDFLNK.H  
1318.6443 1317.6370 1317.6928 -42.36 390 - 400 1 --- K.LEPVYEDLGRK.L  
1318.6443 1317.6370 1317.6928 -42.36 389 - 399 1 --- K.KLEPVYEDLGR.K  
1877.0386 1876.0313 1875.9400 48.7 66 - 81 1 --- R.LIPEYNEAANMLNEKK.S  
1877.0386 1876.0313 1875.9400 48.7 66 - 81 1 --- R.LIPEYNEAANMLNEKK.S  
1905.0511 1904.0438 1903.9461 51.3 65 - 80 1 --- K.RLIPEYNEAANMLNEK.K  
1994.0392 1993.0319 1992.9905 20.8 292 - 310 0 --- K.ASLGLTEFPGLAFQSNAGR.Y  
1998.9767 1997.9694 1998.0686 -49.66 315 - 331 1 --- K.NPKESLLNHNAIINFFK.D  
2282.1650 2281.1577 2281.0595 43.1 48 - 65 1 --- K.NDIVLVMFYAPWCGHCKR.L + Oxidation (M)  
2325.2527 2324.2454 2324.1212 53.4 157 - 175 1 --- K.INVAFYLEYTSEDNDLYKK.F  
2566.2903 2565.2830 2565.2322 19.8 247 - 266 1 --- K.ELVWVCATYEQYNEIKEHVR.L  
No match to: 1034.1162, 1050.0874, 1139.5815, 1139.5815, 1274.7203, 1274.7317, 1384.7184, 1384.7184, 1445.7601, 1479.7841, 1529.7374, 1563.7852, 1563.7852, 1567.7542, 1575.8081, 1638.8492, 1759.9475, 1759.9475, 1787.9674, 1790.9246, 1790.9246, 1815.9518, 1858.9628, 1881.0592, 1906.8796, 1951.9500, 1971.0089, 1993.0059, 1993.0059, 2008.9969, 2042.1071, 2074.9429, 2107.2236, 2117.0906, 2138.1675, 2139.1616, 2185.0957, 2194.0574, 2196.0725, 2202.1440, 2204.1467, 2219.1174, 2225.1460, 2228.1523, 2235.2080, 2251.1221, 2268.1711, 2286.2263, 2286.2263, 2314.1519, 2327.2517, 2330.1921, 2332.1497, 2501.2480, 2586.2400, 2612.1943, 2705.4258, 2726.3000, 2925.5957, 3052.6226, 3136.4932, 3153.4534, 3206.5691, 3211.4873, 3224.5742



## Search Parameters

Type of search : Sequence Query  
Enzyme : Trypsin  
Fixed modifications : [Carbamidomethyl \(C\)](#)  
Variable modifications : [Oxidation \(M\)](#)  
Mass values : Monoisotopic  
Protein Mass : Unrestricted  
Peptide Mass Tolerance :  $\pm 80$  ppm  
Fragment Mass Tolerance :  $\pm 0.3$  Da  
Max Missed Cleavages : 1  
Instrument type : MALDI-TOF-TOF  
Query1 (1034.1162,1+) : <no title>  
Query2 (1050.0874,1+) : <no title>  
Query3 (1139.5815,1+) : <no title>  
Query4 (1139.5815,1+) : MaldiWellID: 66567, SpectrumID: 144114,  
Query5 (1267.6982,1+) : <no title>  
Query6 (1267.6982,1+) : MaldiWellID: 66567, SpectrumID: 144108,  
Query7 (1274.7203,1+) : <no title>  
Query8 (1274.7317,1+) : MaldiWellID: 66567, SpectrumID: 144111,  
Query9 (1318.6443,1+) : <no title>  
Query10 (1318.6443,1+) : MaldiWellID: 66567, SpectrumID: 144115,  
Query11 (1384.7184,1+) : <no title>  
Query12 (1384.7184,1+) : MaldiWellID: 66567, SpectrumID: 144107,  
Query13 (1445.7601,1+) : <no title>  
Query14 (1479.7841,1+) : MaldiWellID: 66567, SpectrumID: 144118,  
Query15 (1529.7374,1+) : <no title>  
Query16 (1563.7852,1+) : <no title>  
Query17 (1563.7852,1+) : MaldiWellID: 66567, SpectrumID: 144112,  
Query18 (1567.7542,1+) : <no title>  
Query19 (1575.8081,1+) : <no title>  
Query20 (1638.8492,1+) : <no title>  
Query21 (1759.9475,1+) : <no title>  
Query22 (1759.9475,1+) : MaldiWellID: 66567, SpectrumID: 144109,  
Query23 (1787.9674,1+) : <no title>  
Query24 (1790.9246,1+) : <no title>  
Query25 (1790.9246,1+) : MaldiWellID: 66567, SpectrumID: 144116,  
Query26 (1815.9518,1+) : <no title>  
Query27 (1858.9628,1+) : <no title>  
Query28 (1877.0386,1+) : <no title>  
Query29 (1877.0386,1+) : MaldiWellID: 66567, SpectrumID: 144113,  
Query30 (1881.0592,1+) : <no title>  
Query31 (1905.0511,1+) : <no title>  
Query32 (1906.8796,1+) : <no title>  
Query33 (1951.9500,1+) : <no title>  
Query34 (1971.0089,1+) : <no title>  
Query35 (1993.0059,1+) : <no title>  
Query36 (1993.0059,1+) : MaldiWellID: 66567, SpectrumID: 144117,  
Query37 (1994.0392,1+) : <no title>  
Query38 (1998.9767,1+) : <no title>  
Query39 (2008.9969,1+) : <no title>  
Query40 (2042.1071,1+) : <no title>  
Query41 (2074.9429,1+) : <no title>  
Query42 (2107.2236,1+) : <no title>  
Query43 (2117.0906,1+) : <no title>  
Query44 (2138.1675,1+) : <no title>  
Query45 (2139.1616,1+) : <no title>  
Query46 (2185.0957,1+) : <no title>  
Query47 (2194.0574,1+) : <no title>  
Query48 (2196.0725,1+) : <no title>  
Query49 (2202.1440,1+) : <no title>  
Query50 (2204.1467,1+) : <no title>  
Query51 (2219.1174,1+) : <no title>  
Query52 (2225.1460,1+) : <no title>  
Query53 (2228.1523,1+) : <no title>  
Query54 (2235.2080,1+) : <no title>  
Query55 (2251.1221,1+) : <no title>  
Query56 (2268.1711,1+) : <no title>  
Query57 (2282.1650,1+) : <no title>  
Query58 (2286.2263,1+) : <no title>  
Query59 (2286.2263,1+) : MaldiWellID: 66567, SpectrumID: 144110,  
Query60 (2314.1519,1+) : <no title>  
Query61 (2325.2527,1+) : <no title>  
Query62 (2327.2517,1+) : <no title>  
Query63 (2330.1921,1+) : <no title>  
Query64 (2332.1497,1+) : <no title>  
Query65 (2501.2480,1+) : <no title>  
Query66 (2566.2903,1+) : <no title>  
Query67 (2586.2400,1+) : <no title>  
Query68 (2612.1943,1+) : <no title>



Query69 (2705.4258,1+) : <no title>  
Query70 (2726.3000,1+) : <no title>  
Query71 (2925.5957,1+) : <no title>  
Query72 (3052.6226,1+) : <no title>  
Query73 (3136.4932,1+) : <no title>  
Query74 (3153.4534,1+) : <no title>  
Query75 (3206.5691,1+) : <no title>  
Query76 (3211.4873,1+) : <no title>  
Query77 (3224.5742,1+) : <no title>

Mascot: <http://www.matrixscience.com/>



# Mascot Search Results

## Protein View

### Band: 1.1

Match to: [gi|237665430](#) Score: 112 Expect: 1.2e-007  
rhoptry-associated protein 2 [*Plasmodium falciparum*]

Nominal mass (Mr): 43672; Calculated pI value: 8.92

NCBI BLAST search of [gi|237665430](#) against nr  
Unformatted [sequence string](#) for pasting into other applications

Taxonomy: [Plasmodium falciparum](#)

Fixed modifications: Carbamidomethyl (C)  
Variable modifications: Oxidation (M)  
Cleavage by Trypsin: cuts C-term side of KR unless next residue is P  
Sequence Coverage: 17%

Matched peptides shown in **Bold Red**

1 **SKLPESNSL TGLIYAHTAH VHK**LSMWVF IYNHFSSADE LIKYLEKTN  
51 NTLENSDHTC FARAVTLYLF YYLKDICKSM LSTDDYQSFF KNKFKDINPL  
101 FINDFILILN DKKFMENLDL YIMKESEREH LVIKKNPFLR VLNKASTTTH  
151 ATYK**SNPYFI VGS**RVHTPYK DYLGDFNKYT EISVLNVVRD **YNFLIYAGSR**  
201 ENYNSDIAG PARSVNNVIS KNKTLGLRKR SSSLALVGTV NNDPIFAYCE  
251 KDNK**SEYGT PDDLITSFFS** **IIK**TKMLNSH KTF LRQFDYA LFHKTYSIPN  
301 LKGRFLKHL FQKNLVNFV GMYENHVSTE INFLAEDFVE LFDVTMDCYS  
351 RQYSNRAEN FKAIRELNVL

Show predicted peptides also

Sort Peptides By ☒ Residue Number ☐ Increasing Mass ☐ Decreasing Mass

| Start - End | Observed  | Mr (expt) | Mr (calc) | ppm | Miss Sequence                           |
|-------------|-----------|-----------|-----------|-----|-----------------------------------------|
| 1 - 23      | 2566.2903 | 2565.2830 | 2565.3339 | -20 | 1 -.SKLPESNSLTGLIYAHTAHVHK.L (No match) |
| 155 - 164   | 1139.5815 | 1138.5742 | 1138.5771 | -3  | 0 K.SNPYFIVGSR.V (No match)             |
| 155 - 164   | 1139.5815 | 1138.5742 | 1138.5771 | -3  | 0 K.SNPYFIVGSR.V (Ions score 38)        |
| 190 - 200   | 1318.6443 | 1317.6370 | 1317.6353 | 1   | 0 R.DYNFLIYAGSR.E (No match)            |
| 190 - 200   | 1318.6443 | 1317.6370 | 1317.6353 | 1   | 0 R.DYNFLIYAGSR.E (Ions score 57)       |
| 255 - 273   | 2196.0725 | 2195.0652 | 2195.0674 | -1  | 0 K.SEYGTDDLITSFFSIIK.T (No match)      |

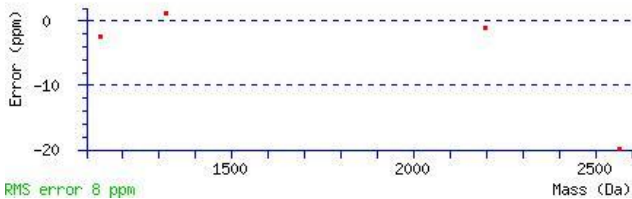

Mascot: <http://www.matrixscience.com/>



Band : 1.1  
 Email :  
 Search title : SampleSetID: 759, AnalysisID: 6312, MALDIWellID: 66567, SpectrumID: 144403, Path=\171004\MSMS\17-112  
 Database : SwissProt 20170116 (553231 sequences; 197953409 residues)  
 Timestamp : 30 Nov 2017 at 07:07:00 GMT  
 Warning : A Peptide summary report will usually give a much clearer picture of MS/MS search results.  
 Top Score : 202 for **CASA1\_BOVIN**, Alpha-S1-casein OS=Bos taurus GN=CSN1S1 PE=1 SV=2

### Mascot Score Histogram

Protein score is  $-10 \times \log(P)$ , where P is the probability that the observed match is a random event.  
 Protein scores greater than 70 are significant ( $p < 0.05$ ).  
 Protein scores are derived from ion scores as a non-probabilistic basis for ranking protein hits.

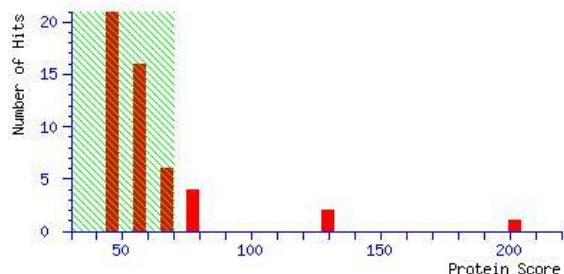

### Protein Summary Report

Format As  [Help](#)  
 Significance threshold  $p < 0.05$

### Index

| Accession                       | Mass    | Score                                             | Description                                                                                |
|---------------------------------|---------|---------------------------------------------------|--------------------------------------------------------------------------------------------|
| 1. <a href="#">CASA1_BOVIN</a>  | 24570   | 202                                               | Alpha-S1-casein OS=Bos taurus GN=CSN1S1 PE=1 SV=2                                          |
| 2. <a href="#">B3AT_HUMAN</a>   | 102013  | 130                                               | Band 3 anion transport protein OS=Homo sapiens GN=SLC4A1 PE=1 SV=3                         |
| 3. <a href="#">CASA1_BUBBU</a>  | 24368   | 127                                               | Alpha-S1-casein OS=Bubalus bubalis GN=CSN1S1 PE=2 SV=2                                     |
| 4. <a href="#">HBB_HUMAN</a>    | 16102   | 82                                                | Hemoglobin subunit beta OS=Homo sapiens GN=HBB PE=1 SV=2                                   |
| 5. <a href="#">HBB_PANPA</a>    | 16102   | 82                                                | Hemoglobin subunit beta OS=Pan paniscus GN=HBB PE=1 SV=2                                   |
| 6. <a href="#">HBB_PANTR</a>    | 16102   | 82                                                | Hemoglobin subunit beta OS=Pan troglodytes GN=HBB PE=1 SV=2                                |
| 7. <a href="#">HBG_TARSY</a>    | 16506   | 76                                                | Hemoglobin subunit gamma OS=Tarsius syrichta GN=HBG PE=2 SV=2                              |
| 8. <a href="#">CASA1_CAPHI</a>  | 24331   | 72                                                | Alpha-S1-casein OS=Capra hircus GN=CSN1S1 PE=1 SV=2                                        |
| 9. <a href="#">HBB_GORGO</a>    | 16074   | 70                                                | Hemoglobin subunit beta OS=Gorilla gorilla gorilla GN=HBB PE=1 SV=2                        |
| 10. <a href="#">HBG_TARBA</a>   | 16388   | 67                                                | Hemoglobin subunit gamma OS=Tarsius bancanus GN=HBG PE=2 SV=3                              |
| 11. <a href="#">CLPB_MYCLE</a>  | 93207   | 66                                                | Chaperone protein ClpB OS=Mycobacterium leprae (strain TN) GN=clpB PE=3 SV=1               |
| 12. <a href="#">HBB_SCAOR</a>   | 16060   | 65                                                | Hemoglobin subunit beta OS=Scapanus orarius GN=HBB PE=2 SV=3                               |
| 13. <a href="#">CASA1_SHEEP</a> | 2434764 | Alpha-S1-casein OS=Ovis aries GN=CSN1S1 PE=1 SV=3 |                                                                                            |
| 14. <a href="#">HBB_MARMA</a>   | 15783   | 58                                                | Hemoglobin subunit beta OS=Marmota marmota GN=HBB PE=1 SV=1                                |
| 15. <a href="#">HBB_SPECT</a>   | 15806   | 58                                                | Hemoglobin subunit beta OS=Spermophilus citellus GN=HBB PE=1 SV=1                          |
| 16. <a href="#">HBB_UROTO</a>   | 15827   | 58                                                | Hemoglobin subunit beta OS=Urocyonellus townsendii PE=1 SV=1                               |
| 17. <a href="#">HBB_PROLO</a>   | 16111   | 58                                                | Hemoglobin subunit beta OS=Procyon lotor GN=HBB PE=1 SV=1                                  |
| 18. <a href="#">TRUB_PEPD6</a>  | 34469   | 57                                                | tRNA pseudouridine synthase B OS=Peptoclostridium difficile (strain 630) GN=truB PE=3 SV=1 |
| 19. <a href="#">HBB_CYNBP</a>   | 15974   | 57                                                | Hemoglobin subunit beta OS=Cynopterus sphinx GN=HBB PE=1 SV=1                              |
| 20. <a href="#">HBB2_RAT</a>    | 16086   | 57                                                | Hemoglobin subunit beta-2 OS=Rattus norvegicus PE=1 SV=2                                   |

### Results List

| 1. <a href="#">CASA1_BOVIN</a>                                                                                                                                                                                                                                                                                                                                                                                                                                                                                                                    | Mass: 24570 | Score: 202 | Expect: 3.5e-015 | Matches: 8                                              |
|---------------------------------------------------------------------------------------------------------------------------------------------------------------------------------------------------------------------------------------------------------------------------------------------------------------------------------------------------------------------------------------------------------------------------------------------------------------------------------------------------------------------------------------------------|-------------|------------|------------------|---------------------------------------------------------|
| Alpha-S1-casein OS=Bos taurus GN=CSN1S1 PE=1 SV=2                                                                                                                                                                                                                                                                                                                                                                                                                                                                                                 |             |            |                  |                                                         |
| Observed                                                                                                                                                                                                                                                                                                                                                                                                                                                                                                                                          | Mr(expt)    | Mr(calc)   | ppm              | Start End Miss IonsPeptide                              |
| 1267.6982                                                                                                                                                                                                                                                                                                                                                                                                                                                                                                                                         | 1266.6909   | 1266.6972  | -4.95            | 106 - 115 0 --- R.YLGYLEQLLR.L                          |
| 1267.6982                                                                                                                                                                                                                                                                                                                                                                                                                                                                                                                                         | 1266.6909   | 1266.6972  | -4.95            | 106 - 115 0 54 R.YLGYLEQLLR.L                           |
| 1384.7184                                                                                                                                                                                                                                                                                                                                                                                                                                                                                                                                         | 1383.7111   | 1383.7227  | -8.39            | 38 - 49 0 --- R.FFVAPFPEVFGK.E                          |
| 1384.7184                                                                                                                                                                                                                                                                                                                                                                                                                                                                                                                                         | 1383.7111   | 1383.7227  | -8.39            | 38 - 49 0 56 R.FFVAPFPEVFGK.E                           |
| 1759.9475                                                                                                                                                                                                                                                                                                                                                                                                                                                                                                                                         | 1758.9402   | 1758.9377  | 1.46             | 23 - 37 0 --- K.HQGLPQEVNLNLLR.F                        |
| 1759.9475                                                                                                                                                                                                                                                                                                                                                                                                                                                                                                                                         | 1758.9402   | 1758.9377  | 1.46             | 23 - 37 0 62 K.HQGLPQEVNLNLLR.F                         |
| 2235.2080                                                                                                                                                                                                                                                                                                                                                                                                                                                                                                                                         | 2234.2007   | 2234.2283  | -12.36           | 19 - 37 1 --- K.HPIKHQGLPQEVNLNLLR.F                    |
| 2332.1497                                                                                                                                                                                                                                                                                                                                                                                                                                                                                                                                         | 2331.1424   | 2331.1245  | 7.68             | 148 - 166 0 --- K.EPMIGVNQELAYFYPELFR.Q + Oxidation (M) |
| No match to: 1034.1162, 1050.0874, 1139.5815, 1139.5815, 1274.7203, 1274.7317, 1318.6443, 1318.6443, 1445.7601, 1479.7841, 1529.7374, 1563.7852, 1563.7852, 1567.7542, 1575.8081, 1638.8492, 1787.9674, 1790.9246, 1790.9246, 1815.9518, 1858.9628, 1877.0386, 1877.0386, 1881.0592, 1905.0511, 1906.8796, 1951.9500, 1971.0089, 1993.0059, 1993.0059, 1994.0392, 1998.9767, 2008.9969, 2042.1071, 2074.9429, 2107.2236, 2117.0906, 2138.1675, 2139.1616, 2185.0957, 2194.0574, 2196.0725, 2202.1440, 2204.1467, 2219.1174, 2225.1460, 2228.1523, |             |            |                  |                                                         |



2251.1221, 2268.1711, 2282.1650, 2286.2263, 2286.2263, 2314.1519, 2325.2527, 2327.2517, 2330.1921, 2501.2480, 2566.2903, 2586.2400, 2612.1943, 2705.4258, 2726.3000, 2925.5957, 3052.6226, 3136.4932, 3153.4534, 3206.5691, 3211.4873, 3224.5742

2. [B3AT\\_HUMAN](#) Mass: 102013 Score: 130 Expect: 5.5e-008 Matches: 11

Band 3 anion transport protein OS=Homo sapiens GN=SLC4A1 PE=1 SV=3

| Observed  | Mr(expt)  | Mr(calc)  | ppm    | Start | End | Miss | Ions | Peptide                                    |
|-----------|-----------|-----------|--------|-------|-----|------|------|--------------------------------------------|
| 1479.7841 | 1478.7768 | 1478.8609 | -56.86 | 540   | -   | 551  | 1    | --- K.LIKIFQDHPQLQK.T                      |
| 1563.7852 | 1562.7779 | 1562.7841 | -3.97  | 139   | -   | 150  | 0    | --- R.FIFEDQIRPQDR.E                       |
| 1563.7852 | 1562.7779 | 1562.7841 | -3.97  | 139   | -   | 150  | 0    | 21 R.FIFEDQIRPQDR.E                        |
| 1877.0386 | 1876.0313 | 1876.0305 | 0.42   | 247   | -   | 263  | 0    | --- R.LQEAAELEAVELPVPIR.F                  |
| 1877.0386 | 1876.0313 | 1876.0305 | 0.42   | 247   | -   | 263  | 0    | 50 R.LQEAAELEAVELPVPIR.F                   |
| 2042.1071 | 2041.0998 | 2041.1069 | -3.45  | 161   | -   | 180  | 0    | --- K.HSHAGELEALGGVKAVALTR.S               |
| 2204.1467 | 2203.1394 | 2203.1385 | 0.40   | 139   | -   | 155  | 1    | --- R.FIFEDQIRPQDREELLR.A                  |
| 2235.2080 | 2234.2007 | 2234.1252 | 33.8   | 57    | -   | 74   | 1    | --- K.VYVELQELVMDEKNQELR.W                 |
| 2251.1221 | 2250.1148 | 2250.1202 | -2.37  | 57    | -   | 74   | 1    | --- K.VYVELQELVMDEKNQELR.W + Oxidation (M) |
| 2286.2263 | 2285.2190 | 2285.2208 | -0.79  | 264   | -   | 283  | 0    | --- R.FLFVLLGPEAPHIDYTLQGR.A               |
| 2286.2263 | 2285.2190 | 2285.2208 | -0.79  | 264   | -   | 283  | 0    | 41 R.FLFVLLGPEAPHIDYTLQGR.A                |

No match to: 1034.1162, 1050.0874, 1139.5815, 1139.5815, 1267.6982, 1267.6982, 1274.7203, 1274.7317, 1318.6443, 1318.6443, 1384.7184, 1384.7184, 1445.7601, 1529.7374, 1567.7542, 1575.8081, 1638.8492, 1759.9475, 1759.9475, 1787.9674, 1790.9246, 1790.9246, 1815.9518, 1858.9628, 1881.0592, 1905.0511, 1906.8796, 1951.9500, 1971.0089, 1993.0059, 1993.0059, 1994.0392, 1998.9767, 2008.9969, 2074.9429, 2107.2236, 2117.0906, 2138.1675, 2139.1616, 2185.0957, 2194.0574, 2196.0725, 2202.1440, 2219.1174, 2225.1460, 2228.1523, 2268.1711, 2282.1650, 2314.1519, 2325.2527, 2327.2517, 2330.1921, 2332.1497, 2501.2480, 2566.2903, 2586.2400, 2612.1943, 2705.4258, 2726.3000, 2925.5957, 3052.6226, 3136.4932, 3153.4534, 3206.5691, 3211.4873, 3224.5742

3. [CASA1\\_BUBBU](#) Mass: 24368 Score: 127 Expect: 1.1e-007 Matches: 5

Alpha-S1-casein OS=Bubalus bubalis GN=CSN1S1 PE=2 SV=2

| Observed  | Mr(expt)  | Mr(calc)  | ppm    | Start | End | Miss | Ions | Peptide                            |
|-----------|-----------|-----------|--------|-------|-----|------|------|------------------------------------|
| 1267.6982 | 1266.6909 | 1266.6972 | -4.95  | 106   | -   | 115  | 0    | --- R.YLGYLEQLLR.L                 |
| 1267.6982 | 1266.6909 | 1266.6972 | -4.95  | 106   | -   | 115  | 0    | 54 R.YLGYLEQLLR.L                  |
| 1384.7184 | 1383.7111 | 1383.7227 | -8.39  | 38    | -   | 49   | 0    | --- R.FFVAPFPEVFGK.E               |
| 1384.7184 | 1383.7111 | 1383.7227 | -8.39  | 38    | -   | 49   | 0    | 56 R.FFVAPFPEVFGK.E                |
| 3206.5691 | 3205.5618 | 3205.6019 | -12.49 | 140   | -   | 166  | 1    | --- K.EGTHAQKKEPMIGVNQELAYFPQLFR.Q |

No match to: 1034.1162, 1050.0874, 1139.5815, 1139.5815, 1274.7203, 1274.7317, 1318.6443, 1318.6443, 1445.7601, 1479.7841, 1529.7374, 1563.7852, 1563.7852, 1567.7542, 1575.8081, 1638.8492, 1759.9475, 1759.9475, 1787.9674, 1790.9246, 1790.9246, 1815.9518, 1858.9628, 1877.0386, 1877.0386, 1881.0592, 1905.0511, 1906.8796, 1951.9500, 1971.0089, 1993.0059, 1993.0059, 1994.0392, 1998.9767, 2008.9969, 2042.1071, 2074.9429, 2107.2236, 2117.0906, 2138.1675, 2139.1616, 2185.0957, 2194.0574, 2196.0725, 2202.1440, 2204.1467, 2219.1174, 2225.1460, 2228.1523, 2235.2080, 2251.1221, 2268.1711, 2282.1650, 2286.2263, 2286.2263, 2314.1519, 2325.2527, 2327.2517, 2330.1921, 2332.1497, 2501.2480, 2566.2903, 2586.2400, 2612.1943, 2705.4258, 2726.3000, 2925.5957, 3052.6226, 3136.4932, 3153.4534, 3211.4873, 3224.5742

4. [HBB\\_HUMAN](#) Mass: 16102 Score: 82 Expect: 0.0033 Matches: 8

Hemoglobin subunit beta OS=Homo sapiens GN=HBB PE=1 SV=2

| Observed  | Mr(expt)  | Mr(calc)  | ppm    | Start | End | Miss | Ions | Peptide                                     |
|-----------|-----------|-----------|--------|-------|-----|------|------|---------------------------------------------|
| 1274.7203 | 1273.7130 | 1273.7183 | -4.14  | 32    | -   | 41   | 0    | --- R.LLVVYPWTQR.F                          |
| 1274.7317 | 1273.7244 | 1273.7183 | 4.81   | 32    | -   | 41   | 0    | 25 R.LLVVYPWTQR.F                           |
| 2074.9429 | 2073.9356 | 2073.9354 | 0.12   | 42    | -   | 60   | 0    | --- R.FFESFGDLSTPDVAMGNPK.V + Oxidation (M) |
| 2228.1523 | 2227.1450 | 2227.1597 | -6.59  | 10    | -   | 31   | 1    | --- K.SAVTALWGKVNVDVGGGEALGR.L              |
| 2286.2263 | 2285.2190 | 2285.1038 | 50.4   | 42    | -   | 62   | 1    | --- R.FFESFGDLSTPDVAMGNPKVK.A               |
| 2286.2263 | 2285.2190 | 2285.1038 | 50.4   | 42    | -   | 62   | 1    | --- R.FFESFGDLSTPDVAMGNPKVK.A               |
| 2586.2400 | 2585.2327 | 2585.2333 | -0.21  | 84    | -   | 105  | 1    | --- K.GTFATLSELHCDKLHVDPENFR.L              |
| 3136.4932 | 3135.4859 | 3135.6692 | -58.45 | 106   | -   | 133  | 1    | --- R.LLGNVLVCVLAHHFGKEFTPPVQAAYQK.V        |

No match to: 1034.1162, 1050.0874, 1139.5815, 1139.5815, 1267.6982, 1267.6982, 1318.6443, 1318.6443, 1384.7184, 1384.7184, 1445.7601, 1479.7841, 1529.7374, 1563.7852, 1563.7852, 1567.7542, 1575.8081, 1638.8492, 1759.9475, 1759.9475, 1787.9674, 1790.9246, 1790.9246, 1815.9518, 1858.9628, 1877.0386, 1877.0386, 1881.0592, 1905.0511, 1906.8796, 1951.9500, 1971.0089, 1993.0059, 1993.0059, 1994.0392, 1998.9767, 2008.9969, 2042.1071, 2107.2236, 2117.0906, 2138.1675, 2139.1616, 2185.0957, 2194.0574, 2196.0725, 2202.1440, 2204.1467, 2219.1174, 2225.1460, 2235.2080, 2251.1221, 2268.1711, 2282.1650, 2314.1519, 2325.2527, 2327.2517, 2330.1921, 2332.1497, 2501.2480, 2566.2903, 2612.1943, 2705.4258, 2726.3000, 2925.5957, 3052.6226, 3153.4534, 3206.5691, 3211.4873, 3224.5742

5. [HBB\\_PANPA](#) Mass: 16102 Score: 82 Expect: 0.0033 Matches: 8

Hemoglobin subunit beta OS=Pan paniscus GN=HBB PE=1 SV=2

| Observed  | Mr(expt)  | Mr(calc)  | ppm    | Start | End | Miss | Ions | Peptide                                     |
|-----------|-----------|-----------|--------|-------|-----|------|------|---------------------------------------------|
| 1274.7203 | 1273.7130 | 1273.7183 | -4.14  | 32    | -   | 41   | 0    | --- R.LLVVYPWTQR.F                          |
| 1274.7317 | 1273.7244 | 1273.7183 | 4.81   | 32    | -   | 41   | 0    | 25 R.LLVVYPWTQR.F                           |
| 2074.9429 | 2073.9356 | 2073.9354 | 0.12   | 42    | -   | 60   | 0    | --- R.FFESFGDLSTPDVAMGNPK.V + Oxidation (M) |
| 2228.1523 | 2227.1450 | 2227.1597 | -6.59  | 10    | -   | 31   | 1    | --- K.SAVTALWGKVNVDVGGGEALGR.L              |
| 2286.2263 | 2285.2190 | 2285.1038 | 50.4   | 42    | -   | 62   | 1    | --- R.FFESFGDLSTPDVAMGNPKVK.A               |
| 2286.2263 | 2285.2190 | 2285.1038 | 50.4   | 42    | -   | 62   | 1    | --- R.FFESFGDLSTPDVAMGNPKVK.A               |
| 2586.2400 | 2585.2327 | 2585.2333 | -0.21  | 84    | -   | 105  | 1    | --- K.GTFATLSELHCDKLHVDPENFR.L              |
| 3136.4932 | 3135.4859 | 3135.6692 | -58.45 | 106   | -   | 133  | 1    | --- R.LLGNVLVCVLAHHFGKEFTPPVQAAYQK.V        |

No match to: 1034.1162, 1050.0874, 1139.5815, 1139.5815, 1267.6982, 1267.6982, 1318.6443, 1318.6443, 1384.7184, 1384.7184, 1445.7601, 1479.7841, 1529.7374, 1563.7852, 1563.7852, 1567.7542, 1575.8081, 1638.8492, 1759.9475, 1759.9475, 1787.9674, 1790.9246, 1790.9246, 1815.9518, 1858.9628, 1877.0386, 1877.0386, 1881.0592, 1905.0511, 1906.8796, 1951.9500, 1971.0089, 1993.0059, 1993.0059, 1994.0392, 1998.9767, 2008.9969, 2042.1071, 2107.2236, 2117.0906, 2138.1675, 2139.1616, 2185.0957, 2194.0574, 2196.0725, 2202.1440, 2204.1467, 2219.1174, 2225.1460, 2235.2080, 2251.1221, 2268.1711, 2282.1650, 2314.1519, 2325.2527, 2327.2517, 2330.1921, 2332.1497, 2501.2480, 2566.2903, 2612.1943, 2705.4258, 2726.3000, 2925.5957, 3052.6226, 3153.4534, 3206.5691, 3211.4873, 3224.5742

6. [HBB\\_PANTR](#) Mass: 16102 Score: 82 Expect: 0.0033 Matches: 8

Hemoglobin subunit beta OS=Pan troglodytes GN=HBB PE=1 SV=2

| Observed  | Mr(expt)  | Mr(calc)  | ppm   | Start | End | Miss | Ions | Peptide            |
|-----------|-----------|-----------|-------|-------|-----|------|------|--------------------|
| 1274.7203 | 1273.7130 | 1273.7183 | -4.14 | 32    | -   | 41   | 0    | --- R.LLVVYPWTQR.F |



1274.7317 1273.7244 1273.7183 4.81 32 - 41 0 25 R.LLVVYPWTQR.F  
2074.9429 2073.9356 2073.9354 0.12 42 - 60 0 --- R.FFESFGDLSTPDAMGNPK.V + Oxidation (M)  
2228.1523 2227.1450 2227.1597 -6.59 10 - 31 1 --- K.SAVTALWGKVNVDVGGGALGR.L  
2286.2263 2285.2190 2285.1038 50.4 42 - 62 1 --- R.FFESFGDLSTPDAMGNPKVK.A  
2286.2263 2285.2190 2285.1038 50.4 42 - 62 1 --- R.FFESFGDLSTPDAMGNPKVK.A  
2586.2400 2585.2327 2585.2333 -0.21 84 - 105 1 --- K.GTFATLSELHCDKLHVDPENFR.L  
3136.4932 3135.4859 3135.6692 -58.45 106 - 133 1 --- R.LLGNVLVCVLAHHFGKEFTPPVQAAYQK.V  
No match to: 1034.1162, 1050.0874, 1139.5815, 1139.5815, 1267.6982, 1267.6982, 1318.6443, 1318.6443, 1384.7184, 1384.7184, 1445.7601,  
1479.7841, 1529.7374, 1563.7852, 1563.7852, 1567.7542, 1575.8081, 1638.8492, 1759.9475, 1759.9475, 1787.9674, 1790.9246, 1790.9246,  
1815.9518, 1858.9628, 1877.0386, 1877.0386, 1881.0592, 1905.0511, 1906.8796, 1951.9500, 1971.0089, 1993.0059, 1993.0059, 1994.0392,  
1998.9767, 2008.9969, 2042.1071, 2107.2236, 2117.0906, 2138.1675, 2139.1616, 2185.0957, 2194.0574, 2196.0725, 2202.1440, 2204.1467,  
2219.1174, 2225.1460, 2235.2080, 2251.1221, 2268.1711, 2282.1650, 2314.1519, 2325.2527, 2327.2517, 2330.1921, 2332.1497, 2501.2480,  
2566.2903, 2612.1943, 2705.4258, 2726.3000, 2925.5957, 3052.6226, 3153.4534, 3206.5691, 3211.4873, 3224.5742

7. [HBG\\_TARSY](#) Mass: 16506 Score: 76 Expect: 0.012 Matches: 7

Hemoglobin subunit gamma OS=Tarsius syrichta GN=HBG PE=2 SV=2  
Observed Mr(expt) Mr(calc) ppm Start End Miss IonsPeptide  
1274.7203 1273.7130 1273.7183 -4.14 32 - 41 0 --- R.LLVVYPWTQR.F  
1274.7317 1273.7244 1273.7183 4.81 32 - 41 0 25 R.LLVVYPWTQR.F  
1858.9628 1857.9555 1857.9506 2.65 67 - 83 1 --- K.KVLSSLGEAVTHMDDLK.D + Oxidation (M)  
2074.9429 2073.9356 2074.0921 -75.44 1 - 18 1 --- .MVHFTAEKAIITSLWAK.V  
2314.1519 2313.1446 2313.2328 -38.13 10 - 31 1 --- K.AITISLWAKVNVEETGGGALGR.L  
2586.2400 2585.2327 2585.3602 -49.30 19 - 41 1 --- K.VNVEETGGGALGRLLLVVYPWTQR.F  
2612.1943 2611.1870 2611.3064 -45.73 68 - 91 1 --- K.VLSSLGEAVTHMDDLKDAFAHLR.L  
No match to: 1034.1162, 1050.0874, 1139.5815, 1139.5815, 1267.6982, 1267.6982, 1318.6443, 1318.6443, 1384.7184, 1384.7184, 1445.7601,  
1479.7841, 1529.7374, 1563.7852, 1563.7852, 1567.7542, 1575.8081, 1638.8492, 1759.9475, 1759.9475, 1787.9674, 1790.9246, 1790.9246,  
1815.9518, 1877.0386, 1877.0386, 1881.0592, 1905.0511, 1906.8796, 1951.9500, 1971.0089, 1993.0059, 1993.0059, 1994.0392, 1998.9767,  
2008.9969, 2042.1071, 2107.2236, 2117.0906, 2138.1675, 2139.1616, 2185.0957, 2194.0574, 2196.0725, 2202.1440, 2204.1467, 2219.1174,  
2225.1460, 2228.1523, 2235.2080, 2251.1221, 2268.1711, 2282.1650, 2286.2263, 2286.2263, 2325.2527, 2327.2517, 2330.1921, 2332.1497,  
2501.2480, 2566.2903, 2705.4258, 2726.3000, 2925.5957, 3052.6226, 3136.4932, 3153.4534, 3206.5691, 3211.4873, 3224.5742

8. [CASA1\\_CAPHI](#) Mass: 24331 Score: 72 Expect: 0.037Matches: 4

Alpha-S1-casein OS=Capra hircus GN=CSN1S1 PE=1 SV=2  
Observed Mr(expt) Mr(calc) ppm Start End Miss IonsPeptide  
1267.6982 1266.6909 1266.6972 -4.95 106 - 115 0 --- R.YLGYLEQLLR.L  
1267.6982 1266.6909 1266.6972 -4.95 106 - 115 0 54 R.YLGYLEQLLR.L  
2194.0574 2193.0501 2193.0219 12.9 74 - 94 1 --- K.QMKAGSSSSSEEIVPNSAEQK.Y  
2726.3000 2725.2927 2725.4592 -61.07 25 - 48 1 --- R.GLSPEVPNENLLRFVVPFPEVFR.K  
No match to: 1034.1162, 1050.0874, 1139.5815, 1139.5815, 1274.7203, 1274.7317, 1318.6443, 1318.6443, 1384.7184, 1384.7184, 1445.7601,  
1479.7841, 1529.7374, 1563.7852, 1563.7852, 1567.7542, 1575.8081, 1638.8492, 1759.9475, 1759.9475, 1787.9674, 1790.9246, 1790.9246,  
1815.9518, 1858.9628, 1877.0386, 1877.0386, 1881.0592, 1905.0511, 1906.8796, 1951.9500, 1971.0089, 1993.0059, 1993.0059, 1994.0392,  
1998.9767, 2008.9969, 2042.1071, 2074.9429, 2107.2236, 2117.0906, 2138.1675, 2139.1616, 2185.0957, 2196.0725, 2202.1440, 2204.1467,  
2219.1174, 2225.1460, 2228.1523, 2235.2080, 2251.1221, 2268.1711, 2282.1650, 2286.2263, 2286.2263, 2314.1519, 2325.2527, 2327.2517,  
2330.1921, 2332.1497, 2501.2480, 2566.2903, 2586.2400, 2612.1943, 2705.4258, 2925.5957, 3052.6226, 3136.4932, 3153.4534, 3206.5691,  
3211.4873, 3224.5742

9. [HBB\\_GORGOG](#) Mass: 16074 Score: 70 Expect: 0.062 Matches: 7

Hemoglobin subunit beta OS=Gorilla gorilla gorilla GN=HBB PE=1 SV=2  
Observed Mr(expt) Mr(calc) ppm Start End Miss IonsPeptide  
1274.7203 1273.7130 1273.7183 -4.14 32 - 41 0 --- R.LLVVYPWTQR.F  
1274.7317 1273.7244 1273.7183 4.81 32 - 41 0 25 R.LLVVYPWTQR.F  
2074.9429 2073.9356 2073.9354 0.12 42 - 60 0 --- R.FFESFGDLSTPDAMGNPK.V + Oxidation (M)  
2228.1523 2227.1450 2227.1597 -6.59 10 - 31 1 --- K.SAVTALWGKVNVDVGGGALGR.L  
2286.2263 2285.2190 2285.1038 50.4 42 - 62 1 --- R.FFESFGDLSTPDAMGNPKVK.A  
2286.2263 2285.2190 2285.1038 50.4 42 - 62 1 --- R.FFESFGDLSTPDAMGNPKVK.A  
3136.4932 3135.4859 3135.6692 -58.45 106 - 133 1 --- K.LLGNVLVCVLAHHFGKEFTPPVQAAYQK.V  
No match to: 1034.1162, 1050.0874, 1139.5815, 1139.5815, 1267.6982, 1267.6982, 1318.6443, 1318.6443, 1384.7184, 1384.7184, 1445.7601,  
1479.7841, 1529.7374, 1563.7852, 1563.7852, 1567.7542, 1575.8081, 1638.8492, 1759.9475, 1759.9475, 1787.9674, 1790.9246, 1790.9246,  
1815.9518, 1858.9628, 1877.0386, 1877.0386, 1881.0592, 1905.0511, 1906.8796, 1951.9500, 1971.0089, 1993.0059, 1993.0059, 1994.0392,  
1998.9767, 2008.9969, 2042.1071, 2107.2236, 2117.0906, 2138.1675, 2139.1616, 2185.0957, 2194.0574, 2196.0725, 2202.1440, 2204.1467,  
2219.1174, 2225.1460, 2235.2080, 2251.1221, 2268.1711, 2282.1650, 2314.1519, 2325.2527, 2327.2517, 2330.1921, 2332.1497, 2501.2480,  
2566.2903, 2586.2400, 2612.1943, 2705.4258, 2726.3000, 2925.5957, 3052.6226, 3153.4534, 3206.5691, 3211.4873, 3224.5742



## Search Parameters

Type of search : Sequence Query  
Enzyme : Trypsin  
Fixed modifications : [Carbamidomethyl \(C\)](#)  
Variable modifications : [Oxidation \(M\)](#)  
Mass values : Monoisotopic  
Protein Mass : Unrestricted  
Peptide Mass Tolerance :  $\pm 80$  ppm  
Fragment Mass Tolerance :  $\pm 0.3$  Da  
Max Missed Cleavages : 1  
Instrument type : MALDI-TOF-TOF  
Query1 (1034.1162,1+) : <no title>  
Query2 (1050.0874,1+) : <no title>  
Query3 (1139.5815,1+) : <no title>  
Query4 (1139.5815,1+) : MaldiWellID: 66567, SpectrumID: 144412,  
Query5 (1267.6982,1+) : <no title>  
Query6 (1267.6982,1+) : MaldiWellID: 66567, SpectrumID: 144406,  
Query7 (1274.7203,1+) : <no title>  
Query8 (1274.7317,1+) : MaldiWellID: 66567, SpectrumID: 144409,  
Query9 (1318.6443,1+) : <no title>  
Query10 (1318.6443,1+) : MaldiWellID: 66567, SpectrumID: 144413,  
Query11 (1384.7184,1+) : <no title>  
Query12 (1384.7184,1+) : MaldiWellID: 66567, SpectrumID: 144405,  
Query13 (1445.7601,1+) : <no title>  
Query14 (1479.7841,1+) : MaldiWellID: 66567, SpectrumID: 144416,  
Query15 (1529.7374,1+) : <no title>  
Query16 (1563.7852,1+) : <no title>  
Query17 (1563.7852,1+) : MaldiWellID: 66567, SpectrumID: 144410,  
Query18 (1567.7542,1+) : <no title>  
Query19 (1575.8081,1+) : <no title>  
Query20 (1638.8492,1+) : <no title>  
Query21 (1759.9475,1+) : <no title>  
Query22 (1759.9475,1+) : MaldiWellID: 66567, SpectrumID: 144407,  
Query23 (1787.9674,1+) : <no title>  
Query24 (1790.9246,1+) : <no title>  
Query25 (1790.9246,1+) : MaldiWellID: 66567, SpectrumID: 144414,  
Query26 (1815.9518,1+) : <no title>  
Query27 (1858.9628,1+) : <no title>  
Query28 (1877.0386,1+) : <no title>  
Query29 (1877.0386,1+) : MaldiWellID: 66567, SpectrumID: 144411,  
Query30 (1881.0592,1+) : <no title>  
Query31 (1905.0511,1+) : <no title>  
Query32 (1906.8796,1+) : <no title>  
Query33 (1951.9500,1+) : <no title>  
Query34 (1971.0089,1+) : <no title>  
Query35 (1993.0059,1+) : <no title>  
Query36 (1993.0059,1+) : MaldiWellID: 66567, SpectrumID: 144415,  
Query37 (1994.0392,1+) : <no title>  
Query38 (1998.9767,1+) : <no title>  
Query39 (2008.9969,1+) : <no title>  
Query40 (2042.1071,1+) : <no title>  
Query41 (2074.9429,1+) : <no title>  
Query42 (2107.2236,1+) : <no title>  
Query43 (2117.0906,1+) : <no title>  
Query44 (2138.1675,1+) : <no title>  
Query45 (2139.1616,1+) : <no title>  
Query46 (2185.0957,1+) : <no title>  
Query47 (2194.0574,1+) : <no title>  
Query48 (2196.0725,1+) : <no title>  
Query49 (2202.1440,1+) : <no title>  
Query50 (2204.1467,1+) : <no title>  
Query51 (2219.1174,1+) : <no title>  
Query52 (2225.1460,1+) : <no title>  
Query53 (2228.1523,1+) : <no title>  
Query54 (2235.2080,1+) : <no title>  
Query55 (2251.1221,1+) : <no title>  
Query56 (2268.1711,1+) : <no title>  
Query57 (2282.1650,1+) : <no title>  
Query58 (2286.2263,1+) : <no title>  
Query59 (2286.2263,1+) : MaldiWellID: 66567, SpectrumID: 144408,  
Query60 (2314.1519,1+) : <no title>  
Query61 (2325.2527,1+) : <no title>  
Query62 (2327.2517,1+) : <no title>  
Query63 (2330.1921,1+) : <no title>  
Query64 (2332.1497,1+) : <no title>  
Query65 (2501.2480,1+) : <no title>  
Query66 (2566.2903,1+) : <no title>



Query67 (2586.2400,1+) : <no title>  
Query68 (2612.1943,1+) : <no title>  
Query69 (2705.4258,1+) : <no title>  
Query70 (2726.3000,1+) : <no title>  
Query71 (2925.5957,1+) : <no title>  
Query72 (3052.6226,1+) : <no title>  
Query73 (3136.4932,1+) : <no title>  
Query74 (3153.4534,1+) : <no title>  
Query75 (3206.5691,1+) : <no title>  
Query76 (3211.4873,1+) : <no title>  
Query77 (3224.5742,1+) : <no title>

Mascot: <http://www.matrixscience.com/>



# Mascot Search Results

## Protein View

Band: 1.1

Match to: B3AT\_HUMAN Score: 130 Expect: 5.5e-008

Band 3 anion transport protein OS=Homo sapiens GN=SLC4A1 PE=1 SV=3

Nominal mass (Mr): 102013; Calculated pI value: 5.08

NCBI BLAST search of B3AT\_HUMAN against nr

Unformatted [sequence string](#) for pasting into other applications

Taxonomy: [Homo sapiens](#)

Fixed modifications: Carbamidomethyl (C)

Variable modifications: Oxidation (M)

Cleavage by Trypsin: cuts C-term side of KR unless next residue is P

Sequence Coverage: 11%

Matched peptides shown in **Boild Red**

1 MEELQDDYED MMEENLEQEE YEDPDIPESQ MEEPAADHTE ATATDYHTTS  
51 HPGTHK**VYVE LQELVMDEKN QELR**WMEAAAR WVQLEENLGE NGAWGRPHLS  
101 HLTFWSLLEL RRVFTKGTVL LDLQETSLAG VANQLLDR**FI FEDQIRPQDR**  
151 **ELLRLALLK HSHAGELEAL GGVKPAVLTR**SGDPSQPLLP QHSLETQLF  
201 CEQGGGGTEG HSPSGILEKI PPDSEATLVL VGRADFLEQP VLGFVRL**QEA**  
251 **ALEAEVLVP PIRFLVLLG PEAPHIDYTQ LGR**AAATLMS ERVFRIDAYM  
301 AQSRGELLHS LEGFLDCSLV LPPTDAPSEQ ALLSLVPVQR ELLRRRYQSS  
351 PAKPDSSFYK GLDLNGGPDD PLQQTGQLFG GLVRDIRRRY PYLSDITDA  
401 FSPQVLAIVI FIYFAALSPA ITFGGLLGEK TRNQMGVSEL LISTAVQGIL  
451 FALLGAQPLL VVGFSGPLLV FEEAFFSFCE TNGLEYIVGR VNIQFWLILL  
501 VVLVAFEGS FLVRFISRYT QEIFSFLISL IFIYETFSK**L IKIFQDHPLQ**  
551 **K**TYNNYNLMV PKPQGPLPNT ALLSLVLMAG TFFFAMMLRK FKNSSYFPGK  
601 LRRVIGDFGV PISILIMVLV DFFIQDTYTQ KLSVPDGFKV SNSSARGWVI  
651 HPLGLRSEFP IWMFASALP ALLVFILIFL ESQITTLIVS KPERKMKVGS  
701 GFHLDLLLIV GMGVAALFG MPWLSATTVR SVTHANALTV MGKASTPGAA  
751 AQIQEVKEQR ISGLLVAVLV GLSILMEPIL SRIPLAVLFG IFLYMGVTSL  
801 SGIQLFDRIL LLFKPPKYHP DVPYVKRVKT WRMHFLTGIQ IICLAVLWVV  
851 KSTPASLALP FVLILTIVPL RVLLPLIFRN VELQCLDADD AKATFDEEEG  
901 RDEYDEVAMP V

Show predicted peptides also

Sort Peptides By ☒ Residue Number ☒ Increasing Mass ☐ Decreasing Mass

| Start - End | Observed  | Mr (expt) | Mr (calc) | ppm | Miss                              | Sequence                                  |
|-------------|-----------|-----------|-----------|-----|-----------------------------------|-------------------------------------------|
| 57 -74      | 2235.2080 | 2234.2007 | 2234.1252 | 34  | 1K.VYVEL <b>LQELVMDEKNQELR.W</b>  | ( <a href="#">No match</a> )              |
| 57 -74      | 2251.1221 | 2250.1148 | 2250.1202 | -2  | 1K.VYVEL <b>LQELVMDEKNQELR.W</b>  | Oxidation(M) ( <a href="#">No match</a> ) |
| 139 -150    | 1563.7852 | 1562.7779 | 1562.7841 | -4  | 0R.FIFEDQIRPQDR. <b>E</b>         | ( <a href="#">No match</a> )              |
| 139 -150    | 1563.7852 | 1562.7779 | 1562.7841 | -4  | 0R.FIFEDQIRPQDR. <b>E</b>         | ( <a href="#">Ions score 21</a> )         |
| 139 -155    | 2204.1467 | 2203.1394 | 2203.1385 | 0   | 1R.FIFEDQIRPQDREELLR. <b>A</b>    | ( <a href="#">No match</a> )              |
| 161 -180    | 2042.1071 | 2041.0998 | 2041.1069 | -3  | 0K.HSHAGELEALGGV <b>KPAVLTR.S</b> | ( <a href="#">No match</a> )              |
| 247 -263    | 1877.0386 | 1876.0313 | 1876.0305 | 0   | 0R.LQEAAELEAVELPV <b>PIR.F</b>    | ( <a href="#">No match</a> )              |
| 247 -263    | 1877.0386 | 1876.0313 | 1876.0305 | 0   | 0R.LQEAAELEAVELPV <b>PIR.F</b>    | ( <a href="#">Ions score 50</a> )         |
| 264 -283    | 2286.2263 | 2285.2190 | 2285.2208 | -1  | 0R.FLFVLLGPEAPHIDYT <b>QLGR.A</b> | ( <a href="#">No match</a> )              |
| 264 -283    | 2286.2263 | 2285.2190 | 2285.2208 | -1  | 0R.FLFVLLGPEAPHIDYT <b>QLGR.A</b> | ( <a href="#">Ions score 41</a> )         |
| 540 -551    | 1479.7841 | 1478.7768 | 1478.8609 | -57 | 1K.LIKIFQDH <b>PLQK.T</b>         | ( <a href="#">No match</a> )              |

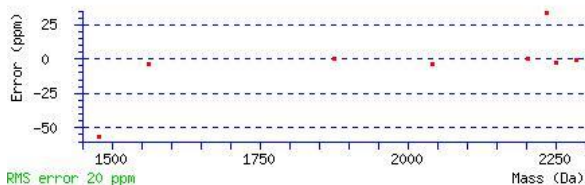



**Protein View**

**Band: 1.1**

Match to: HBB\_HUMAN Score: 82 Expect: 0.0033

Hemoglobin subunit beta OS=Homo sapiens GN=HBB PE=1 SV=2

Nominal mass (Mr): 16102; Calculated pI value: 6.75

NCBI BLAST search of HBB\_HUMAN against nr

Unformatted [sequence string](#) for pasting into other applications

Taxonomy: [Homo sapiens](#)

Fixed modifications: Carbamidomethyl (C)

Variable modifications: Oxidation (M)

Cleavage by Trypsin: cuts C-term side of KR unless next residue is P

Sequence Coverage: 70%

Matched peptides shown in **Bold Red**

1 MVHLTPEEK**S** AVTALWGKVN VDEVGGEALG RLLVVYPWTQ RFFESFGDLS  
 51 **TPDAVMGNPK** VKAHGKKVLG AFSDGLAHLN NLK**GT**FATLS ELHCDKLHVD  
 101 **PENFRLLGNV** LVCVLAHHFG KEFTPPVQAA YQKVVAGVAN ALAHKYY

Show predicted peptides also

Sort Peptides By ☒ Residue Number ☒ Increasing Mass ☐ Decreasing Mass

| Start - End | Observed  | Mr (expt) | Mr (calc) | ppm | Miss Sequence                     |                                            |
|-------------|-----------|-----------|-----------|-----|-----------------------------------|--------------------------------------------|
| 10- 31      | 2228.1523 | 2227.1450 | 2227.1597 | -7  | 1K.SAVTALWGKVNVDDEVGGEALGR.L      | ( <a href="#">No match</a> )               |
| 32- 41      | 1274.7203 | 1273.7130 | 1273.7183 | -4  | 0R.LLVVYPWTQR.F                   | ( <a href="#">No match</a> )               |
| 32- 41      | 1274.7317 | 1273.7244 | 1273.7183 | 5   | 0R.LLVVYPWTQR.F                   | ( <a href="#">Ions score 25</a> )          |
| 42- 60      | 2074.9429 | 2073.9356 | 2073.9354 | 0   | 0R.FFESFGDLSTPDAVMGNPK.V          | Oxidation (M) ( <a href="#">No match</a> ) |
| 42- 62      | 2286.2263 | 2285.2190 | 2285.1038 | 50  | 1R.FFESFGDLSTPDAVMGNPKV.A         | ( <a href="#">No match</a> )               |
| 42- 62      | 2286.2263 | 2285.2190 | 2285.1038 | 50  | 1R.FFESFGDLSTPDAVMGNPKV.A         | ( <a href="#">No match</a> )               |
| 84- 105     | 2586.2400 | 2585.2327 | 2585.2333 | -0  | 1K.GTFATLSELHCDKLHVDPENFR.L       | ( <a href="#">No match</a> )               |
| 106- 133    | 3136.4932 | 3135.4859 | 3135.6692 | -58 | 1R.LLGNVLCVLAHHFGKEFTPPVQAAAYQK.V | ( <a href="#">No match</a> )               |

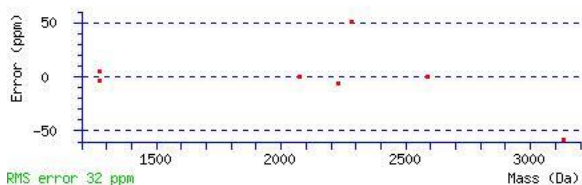



# MASCOT Search Results

Band : 1.2

Search title : SampleSetID: 759, AnalysisID: 6312, MALDIWellID: 66568, SpectrumID: 144417, Path=\171004\MSMS\17-112  
Database : SwissProt 20170116 (553231 sequences; 197953409 residues)  
Timestamp : 30 Nov 2017 at 07:07:19 GMT  
Warning : A Peptide summary report will usually give a much clearer picture of MS/MS search results.  
Top Score : 274 for B3AT\_HUMAN, Band 3 anion transport protein OS=Homo sapiens GN=SLC4A1 PE=1 SV=3

SP combined run 79 y 72

## Mascot Score Histogram

Protein score is  $-10 \times \log(P)$ , where P is the probability that the observed match is a random event.

Protein scores greater than 70 are significant ( $p < 0.05$ ).

Protein scores are derived from ions scores as a non-probabilistic basis for ranking protein hits.

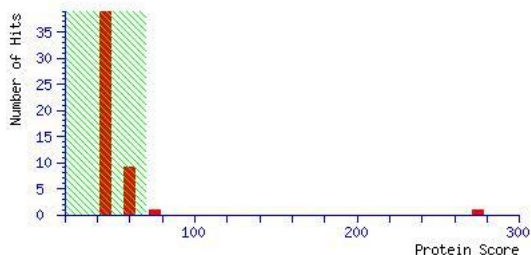

## Protein Summary Report

Format As Protein Summary (deprecated) [Help](#)  
Significance threshold  $p < 0.05$  Max. number of hits 20

[Re-Search All](#) [Search Unmatched](#)

## Index

| Accession                       | Mass     | Score | Description                                                                                                                |
|---------------------------------|----------|-------|----------------------------------------------------------------------------------------------------------------------------|
| 1. <a href="#">B3AT_HUMAN</a>   | 102013   | 274   | Band 3 anion transport protein OS=Homo sapiens GN=SLC4A1 PE=1 SV=3                                                         |
| 2. <a href="#">CASA1_BOVIN</a>  | 2457080  |       | Alpha-S1-casein OS=Bos taurus GN=CSN1S1 PE=1 SV=2                                                                          |
| 3. <a href="#">CASA1_BUBBU</a>  | 2436865  |       | Alpha-S1-casein OS=Bubalus bubalis GN=CSN1S1 PE=2 SV=2                                                                     |
| 4. <a href="#">YNI2_BACSX</a>   | 29146    | 64    | Uncharacterized protein in nit 5' region OS=Bacillus sp. (strain OxB-1) PE=4 SV=1                                          |
| 5. <a href="#">MDV1_CANGA</a>   | 80505    | 63    | Mitochondrial division protein 1 OS=Candida glabrata (strain ATCC 2001 / CBS 138 / JCM 3761 / NBRC 0622 / NRRL Y-65) GN=MD |
| 6. <a href="#">END4_MYCPN</a>   | 32212    | 58    | Probable endonuclease 4 OS=Mycoplasma pneumoniae (strain ATCC 29342 / M129) GN=nfo PE=3 SV=1                               |
| 7. <a href="#">PPR1_ARATH</a>   | 46732    | 58    | Pentatricopeptide repeat-containing protein At1g01970 OS=Arabidopsis thaliana GN=At1g01970 PE=2 SV=1                       |
| 8. <a href="#">HIS6_TERT</a>    | 27613    | 56    | Imidazole glycerol phosphate synthase subunit HisF OS=Teredinibacter turnerae (strain ATCC 39867 / T7901) GN=hisF PE=3 SV= |
| 9. <a href="#">PURO_METMS</a>   | 22766    | 56    | IMP cyclohydrolase OS=Methanococcus maripaludis (strain C5 / ATCC BAA-1333) GN=purO PE=3 SV=1                              |
| 10. <a href="#">SUCC_BART1</a>  | 43131    | 55    | Succinate--CoA ligase [ADP-forming] subunit beta OS=Bartonella tribocorum (strain CIP 105476 / IBS 506) GN=sucC PE=3 SV=1  |
| 11. <a href="#">ATPB2_RHOFT</a> | 5644455  |       | ATP synthase subunit beta 2 OS=Rhodospirillum rubrum (strain ATCC BAA-621 / DSM 15236 / T118) GN=atpD2 PE=3 SV=1           |
| 12. <a href="#">CPT1A_MOUSE</a> | 8893652  |       | Carnitine O-palmitoyltransferase 1, liver isoform OS=Mus musculus GN=Cpt1a PE=1 SV=4                                       |
| 13. <a href="#">MUTS_FRATN</a>  | 95981    | 52    | DNA mismatch repair protein MutS OS=Francisella tularensis subsp. novicida (strain U112) GN=muts PE=3 SV=1                 |
| 14. <a href="#">XB31_ARATH</a>  | 50775    | 52    | Putative E3 ubiquitin-protein ligase XBAT31 OS=Arabidopsis thaliana GN=XBAT31 PE=2 SV=1                                    |
| 15. <a href="#">SYR_KLEP7</a>   | 64430    | 51    | Arginine--tRNA ligase OS=Klebsiella pneumoniae subsp. pneumoniae (strain ATCC 700721 / MGH 78578) GN=argS PE=1 SV=1        |
| 16. <a href="#">TRUB_PEPD6</a>  | 34469    | 50    | tRNA pseudouridine synthase B OS=Peptoclostridium difficile (strain 630) GN=truB PE=3 SV=1                                 |
| 17. <a href="#">TOB1B_XENLA</a> | 17106650 |       | DNA topoisomerase 2-binding protein 1-B OS=Xenopus laevis GN=topbp1-B PE=2 SV=1                                            |
| 18. <a href="#">TRUB_GEOTN</a>  | 33418    | 50    | tRNA pseudouridine synthase B OS=Geobacillus thermodenitrificans (strain NG80-2) GN=truB PE=3 SV=1                         |
| 19. <a href="#">KPVR_RAT</a>    | 62504    | 50    | Pyruvate kinase PKLR OS=Rattus norvegicus GN=Pklr PE=1 SV=2                                                                |
| 20. <a href="#">BXL2_ARATH</a>  | 83845    | 50    | Probable beta-D-xylosidase 2 OS=Arabidopsis thaliana GN=BXL2 PE=2 SV=1                                                     |

## Results List

| 1.                                                                                                                                                                                                                                                                                                                                                                                                                                                                                                                                                                                                                                                             | <a href="#">B3AT_HUMAN</a> | Mass: 102013 | Score: 274 | Expect: 2.2e-022 | Matches: 13                                  |
|----------------------------------------------------------------------------------------------------------------------------------------------------------------------------------------------------------------------------------------------------------------------------------------------------------------------------------------------------------------------------------------------------------------------------------------------------------------------------------------------------------------------------------------------------------------------------------------------------------------------------------------------------------------|----------------------------|--------------|------------|------------------|----------------------------------------------|
| Band 3 anion transport protein OS=Homo sapiens GN=SLC4A1 PE=1 SV=3                                                                                                                                                                                                                                                                                                                                                                                                                                                                                                                                                                                             |                            |              |            |                  |                                              |
| Observed                                                                                                                                                                                                                                                                                                                                                                                                                                                                                                                                                                                                                                                       | Mr(expt)                   | Mr(calc)     | ppm        | Start            | End Miss Ions Peptide                        |
| 1466.8042                                                                                                                                                                                                                                                                                                                                                                                                                                                                                                                                                                                                                                                      | 1465.7969                  | 1465.8140    | -11.68     | 220 - 233        | 0 --- K.IPPDSEATLVLVGR.A                     |
| 1563.7766                                                                                                                                                                                                                                                                                                                                                                                                                                                                                                                                                                                                                                                      | 1562.7693                  | 1562.7841    | -9.48      | 139 - 150        | 0 --- R.FIFEDQIRPQDR.E                       |
| 1563.7766                                                                                                                                                                                                                                                                                                                                                                                                                                                                                                                                                                                                                                                      | 1562.7693                  | 1562.7841    | -9.48      | 139 - 150        | 0 41 R.FIFEDQIRPQDR.E                        |
| 1877.0319                                                                                                                                                                                                                                                                                                                                                                                                                                                                                                                                                                                                                                                      | 1876.0246                  | 1876.0305    | -3.15      | 247 - 263        | 0 --- R.LQEAALAEAVLPVPIR.F                   |
| 1877.0319                                                                                                                                                                                                                                                                                                                                                                                                                                                                                                                                                                                                                                                      | 1876.0246                  | 1876.0305    | -3.15      | 247 - 263        | 0 121 R.LQEAALAEAVLPVPIR.F                   |
| 2042.1002                                                                                                                                                                                                                                                                                                                                                                                                                                                                                                                                                                                                                                                      | 2041.0929                  | 2041.1069    | -6.83      | 161 - 180        | 0 --- K.HSHAGELEALGGVPAVLTR.S                |
| 2042.1002                                                                                                                                                                                                                                                                                                                                                                                                                                                                                                                                                                                                                                                      | 2041.0929                  | 2041.1069    | -6.83      | 161 - 180        | 0 78 K.HSHAGELEALGGVPAVLTR.S                 |
| 2204.1377                                                                                                                                                                                                                                                                                                                                                                                                                                                                                                                                                                                                                                                      | 2203.1304                  | 2203.1385    | -3.68      | 139 - 155        | 1 --- R.FIFEDQIRPQDRELLR.A                   |
| 2235.1809                                                                                                                                                                                                                                                                                                                                                                                                                                                                                                                                                                                                                                                      | 2234.1736                  | 2234.1252    | 21.7       | 57 - 74          | 1 --- K.VYVELQELVMDEKNQELR.W                 |
| 2251.1287                                                                                                                                                                                                                                                                                                                                                                                                                                                                                                                                                                                                                                                      | 2250.1214                  | 2250.1202    | 0.56       | 57 - 74          | 1 --- K.VYVELQELVMDEKNQELR.W + Oxidation (M) |
| 2257.1682                                                                                                                                                                                                                                                                                                                                                                                                                                                                                                                                                                                                                                                      | 2256.1609                  | 2256.2527    | -40.67     | 833 - 851        | 0 --- R.MHLFTGIQIICLAVLWVK.S + Oxidation (M) |
| 2286.2207                                                                                                                                                                                                                                                                                                                                                                                                                                                                                                                                                                                                                                                      | 2285.2134                  | 2285.2208    | -3.25      | 264 - 283        | 0 --- R.FLFVLLGPEAPHIDYTLQGR.A               |
| 2326.2573                                                                                                                                                                                                                                                                                                                                                                                                                                                                                                                                                                                                                                                      | 2325.2500                  | 2325.2540    | -1.70      | 117 - 138        | 0 --- K.GTVLLDLQETSLAGVANQLLDR.F             |
| No match to: 1034.1259, 1050.1039, 1267.6926, 1274.7139, 1383.7844, 1384.7263, 1384.7263, 1442.7651, 1445.7534, 1475.7468, 1518.8203, 1529.7251, 1575.7903, 1638.8424, 1648.8182, 1716.8835, 1759.9320, 1762.9080, 1786.8893, 1790.9202, 1831.9440, 1859.0093, 1881.0465, 1905.0568, 1950.9700, 1970.9786, 1994.0464, 2070.0525, 2074.9507, 2107.2280, 2107.2280, 2117.0906, 2178.1001, 2186.1506, 2194.0940, 2225.1450, 2228.1609, 2250.1626, 2263.1658, 2268.2048, 2282.1624, 2289.2249, 2292.1792, 2308.1628, 2313.1716, 2314.1470, 2325.2048, 2332.1472, 2367.2200, 2468.2456, 2526.2200, 2549.3303, 2611.2832, 3052.6353, 3135.5813, 3153.5376, 3211.5759 |                            |              |            |                  |                                              |



2. [CASA1\\_BOVIN](#) Mass: 24570 Score: 80 Expect: 0.0059 Matches: 6

Alpha-S1-casein OS=Bos taurus GN=CSN1S1 PE=1 SV=2

| Observed  | Mr(expt)  | Mr(calc)  | ppm    | Start | End   | Miss | Ions | Peptide                                 |
|-----------|-----------|-----------|--------|-------|-------|------|------|-----------------------------------------|
| 1267.6926 | 1266.6853 | 1266.6972 | -9.37  | 106   | - 115 | 0    | ---  | R.YLGYLEQLLR.L                          |
| 1384.7263 | 1383.7190 | 1383.7227 | -2.68  | 38    | - 49  | 0    | ---  | R.FFVAPFPEVFGK.E                        |
| 1384.7263 | 1383.7190 | 1383.7227 | -2.68  | 38    | - 49  | 0    | 49   | R.FFVAPFPEVFGK.E                        |
| 1759.9320 | 1758.9247 | 1758.9377 | -7.35  | 23    | - 37  | 0    | ---  | K.HQGLPQEVLENLLR.F                      |
| 2235.1809 | 2234.1736 | 2234.2283 | -24.49 | 19    | - 37  | 1    | ---  | K.HPIKHQGLPQEVLENLLR.F                  |
| 2332.1472 | 2331.1399 | 2331.1245 | 6.60   | 148   | - 166 | 0    | ---  | K.EPMIGVNQELAYFYPELFR.Q + Oxidation (M) |

No match to: 1034.1259, 1050.1039, 1274.7139, 1383.7844, 1442.7651, 1445.7534, 1466.8042, 1475.7468, 1518.8203, 1529.7251, 1563.7766, 1563.7766, 1575.7903, 1638.8424, 1648.8182, 1716.8835, 1762.9080, 1786.8893, 1790.9202, 1831.9440, 1859.0093, 1877.0319, 1877.0319, 1881.0465, 1905.0568, 1950.9700, 1970.9786, 1994.0464, 2042.1002, 2042.1002, 2070.0525, 2074.9507, 2107.2280, 2107.2280, 2117.0906, 2178.1001, 2186.1506, 2194.0940, 2204.1377, 2225.1450, 2228.1609, 2250.1626, 2251.1287, 2257.1682, 2263.1658, 2268.2048, 2282.1624, 2286.2207, 2289.2249, 2292.1792, 2308.1628, 2313.1716, 2314.1470, 2325.2048, 2326.2573, 2367.2200, 2468.2456, 2526.2200, 2549.3303, 2611.2832, 3052.6353, 3135.5813, 3153.5376, 3211.5759

## Search Parameters

Type of search :Sequence Query  
 Enzyme :Trypsin  
 Fixed modifications :[Carbamidomethyl \(C\)](#)  
 Variable modifications :[Oxidation \(M\)](#)  
 Mass values :Monoisotopic  
 Protein Mass :Unrestricted  
 Peptide Mass Tolerance : ± 80 ppm  
 Fragment Mass Tolerance: ± 0.3 Da  
 Max Missed Cleavages :1  
 Instrument type :MALDI-TOF-TOF  
 Query1 (1034.1259,1+) :<no title>  
 Query2 (1050.1039,1+) :<no title>  
 Query3 (1267.6926,1+) :<no title>  
 Query4 (1274.7139,1+) :<no title>  
 Query5 (1383.7844,1+) :<no title>  
 Query6 (1384.7263,1+) :<no title>  
 Query7 (1384.7263,1+) :MaldiWellID: 66568, SpectrumID: 144422,  
 Query8 (1442.7651,1+) :<no title>  
 Query9 (1445.7534,1+) :<no title>  
 Query10 (1466.8042,1+) :<no title>  
 Query11 (1475.7468,1+) :<no title>  
 Query12 (1518.8203,1+) :<no title>  
 Query13 (1529.7251,1+) :<no title>  
 Query14 (1563.7766,1+) :<no title>  
 Query15 (1563.7766,1+) :MaldiWellID: 66568, SpectrumID: 144421,  
 Query16 (1575.7903,1+) :<no title>  
 Query17 (1638.8424,1+) :<no title>  
 Query18 (1648.8182,1+) :<no title>  
 Query19 (1716.8835,1+) :<no title>  
 Query20 (1759.9320,1+) :<no title>  
 Query21 (1762.9080,1+) :<no title>  
 Query22 (1786.8893,1+) :<no title>  
 Query23 (1790.9202,1+) :<no title>  
 Query24 (1831.9440,1+) :<no title>  
 Query25 (1859.0093,1+) :<no title>  
 Query26 (1877.0319,1+) :<no title>  
 Query27 (1877.0319,1+) :MaldiWellID: 66568, SpectrumID: 144420,  
 Query28 (1881.0465,1+) :<no title>  
 Query29 (1905.0568,1+) :<no title>  
 Query30 (1950.9700,1+) :<no title>  
 Query31 (1970.9786,1+) :<no title>  
 Query32 (1994.0464,1+) :<no title>  
 Query33 (2042.1002,1+) :<no title>  
 Query34 (2042.1002,1+) :MaldiWellID: 66568, SpectrumID: 144419,  
 Query35 (2070.0525,1+) :<no title>  
 Query36 (2074.9507,1+) :<no title>  
 Query37 (2107.2280,1+) :<no title>  
 Query38 (2107.2280,1+) :MaldiWellID: 66568, SpectrumID: 144418,  
 Query39 (2117.0906,1+) :<no title>  
 Query40 (2178.1001,1+) :<no title>  
 Query41 (2186.1506,1+) :<no title>  
 Query42 (2194.0940,1+) :<no title>  
 Query43 (2204.1377,1+) :<no title>  
 Query44 (2225.1450,1+) :<no title>  
 Query45 (2228.1609,1+) :<no title>  
 Query46 (2235.1809,1+) :<no title>  
 Query47 (2250.1626,1+) :<no title>  
 Query48 (2251.1287,1+) :<no title>  
 Query49 (2257.1682,1+) :<no title>  
 Query50 (2263.1658,1+) :<no title>  
 Query51 (2268.2048,1+) :<no title>  
 Query52 (2282.1624,1+) :<no title>  
 Query53 (2286.2207,1+) :<no title>  
 Query54 (2289.2249,1+) :<no title>  
 Query55 (2292.1792,1+) :<no title>  
 Query56 (2308.1628,1+) :<no title>  
 Query57 (2313.1716,1+) :<no title>  
 Query58 (2314.1470,1+) :<no title>  
 Query59 (2325.2048,1+) :<no title>  
 Query60 (2326.2573,1+) :<no title>  
 Query61 (2332.1472,1+) :<no title>  
 Query62 (2367.2200,1+) :<no title>  
 Query63 (2468.2456,1+) :<no title>  
 Query64 (2526.2200,1+) :<no title>  
 Query65 (2549.3303,1+) :<no title>  
 Query66 (2611.2832,1+) :<no title>  
 Query67 (3052.6353,1+) :<no title>  
 Query68 (3135.5813,1+) :<no title>  
 Query69 (3153.5376,1+) :<no title>





# Mascot Search Results

Protein View

Band: 1.2

Match to: **B3AT\_HUMAN** Score: 274 Expect: 2.2e-022  
Band 3 anion transport protein OS=Homo sapiens GN=SLC4A1 PE=1 SV=3

Nominal mass (Mr): 102013; Calculated pI value: 5.08

NCBI BLAST search of **B3AT\_HUMAN** against nr  
Unformatted [sequence string](#) for pasting into other applications

Taxonomy: [Homo sapiens](#)

Fixed modifications: Carbamidomethyl (C)  
Variable modifications: Oxidation (M)  
Cleavage by Trypsin: cuts C-term side of KR unless next residue is P  
Sequence Coverage: 16%

Matched peptides shown in **Bold Red**

1 MEELQDDYED MMEENLEQEE YEDPDIPESQ MEEPAAHDE ATATDYHTTS  
51 HPGTHK**VYVE LQELVMDEKN QELRW**MEAAAR WVQLEENLGE NGAWGRPHLS  
101 HLTFWSLLEL RRVFTK**GTVL LDLQETSLAG VANQLDRFI FEDQIRPQDR**  
151 **EELLR**ALLLK **HSHAGELEAL GGVKPAVLTR** SGDPSPQLLP QHSSLETQLF  
201 CEQDGGTEG HSPSGILEK**I PPDSEATLVL VGRADFLEQP** VLGFVRL**QEA**  
251 **AELEAVE**LPV **PIRFLFVLLG PEAPHIDY**TQ LGRAAATLMS ERVFRIDAYM  
301 AQSRGELLHS LEGFLDCSLV LPPTDAPSEQ ALLSLVPVQR ELLRRRYQSS  
351 PAKPDSSFYK GLDLNGGPDD PLQQTGQLFG GLVRDIRRRY PYYLSDITDA  
401 FSPQVLAIVI FIYFAALSPA ITFGGLGEEK TRNQMGVSEL LISTAVQGIL  
451 FALLGAQPLL VVGFSGPLLV FEEAFFSFCE TNGLEYIVGR VMIGFWLILL  
501 VVLVVAFEGS FLVRFISRYT QEIFSFLISL IFIYETFSKL IKIFQDHPHQ  
551 KTYNYNVLMV PKPQGPLPNT ALLSLVLMAG TFFFAMMLRK FKNSSYFPGK  
601 LRRVIGDFGV PISILIMLV DFFIQDTYTQ KLSVPDGFVK SNSSARGWVI  
651 HPLGLRSEFP IWMFASALP ALLVFILIFL ESQITTLIVS KPERKMKVGS  
701 GFHLDLLLV GMGGVAALFG MPWLSATTVR SVTHANALTV MGKASTPGAA  
751 AQIQEVKEQR ISGLLVAVLV GLSILMEPIL SRIPLAVLFG IFLYMGVTSL  
801 SGIQLFDRI LFLKPPKYHP DVPYVKRVKT **WRMHLFTGIQ IICLAVLWV**  
851 **KSTPASLALP** FVLILTVPRL RVLLPLIFRN VELQCLDADD AKATFDEEEG  
901 RDEYDEVAMP V

Show predicted peptides also

Sort Peptides By ☒ Residue Number ☐ Increasing Mass ☐ Decreasing Mass

| Start | End | Observed  | Mr (expt) | Mr (calc) | ppm | Miss | Sequence                                                  |
|-------|-----|-----------|-----------|-----------|-----|------|-----------------------------------------------------------|
| 57    | 74  | 2235.1809 | 2234.1736 | 2234.1252 | 22  | 1    | K.VYVEL <b>QELVMDEKNQELR</b> .W (No match)                |
| 57    | 74  | 2251.1287 | 2250.1214 | 2250.1202 | 1   | 1    | K.VYVEL <b>QELVMDEKNQELR</b> .W Oxidation (M) (No match)  |
| 117   | 138 | 2326.2573 | 2325.2500 | 2325.2540 | -2  | 0    | K.GTVLLDL <b>QETSLAGVANQLDR</b> .F (No match)             |
| 139   | 150 | 1563.7766 | 1562.7693 | 1562.7841 | -9  | 0    | R.FIFEDQIRPQDR.E (No match)                               |
| 139   | 150 | 1563.7766 | 1562.7693 | 1562.7841 | -9  | 0    | R.FIFEDQIRPQDR.E (Ions score 41)                          |
| 139   | 155 | 2204.1377 | 2203.1304 | 2203.1385 | -4  | 1    | R.FIFEDQIRPQDRELLR.A (No match)                           |
| 161   | 180 | 2042.1002 | 2041.0929 | 2041.1069 | -7  | 0    | K.HSHAGELEALGGVKPAVLTR.S (No match)                       |
| 161   | 180 | 2042.1002 | 2041.0929 | 2041.1069 | -7  | 0    | K.HSHAGELEALGGVKPAVLTR.S (Ions score 78)                  |
| 220   | 233 | 1466.8042 | 1465.7969 | 1465.8140 | -12 | 0    | K.IPPDSEATLVLVGR.A (No match)                             |
| 247   | 263 | 1877.0319 | 1876.0246 | 1876.0305 | -3  | 0    | R.LQEAAELEAVELPVPIR.F (No match)                          |
| 247   | 263 | 1877.0319 | 1876.0246 | 1876.0305 | -3  | 0    | R.LQEAAELEAVELPVPIR.F (Ions score 121)                    |
| 264   | 283 | 2286.2207 | 2285.2134 | 2285.2208 | -3  | 0    | R.FLFVLLGPEAPHIDYTLGR.A (No match)                        |
| 833   | 851 | 2257.1682 | 2256.1609 | 2256.2527 | -41 | 0    | R.MHLFTGIQ <b>IICLAVLWVVK</b> .S Oxidation (M) (No match) |

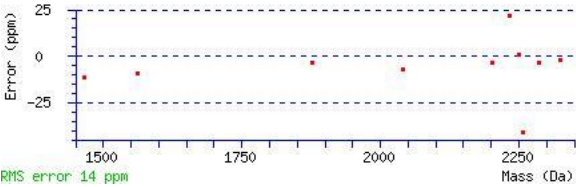



# Mascot Search Results

**Band** : 2  
**User** :  
**Email** :  
**Search title** : SampleSetID: 759, AnalysisID: 6312, MaldiWellID: 66572, SpectrumID: 144455, Path=\171004\MSMS\17-112 SP combined run 79 y 72  
**Database** : SwissProt 20170116 (553231 sequences; 197953409 residues)  
**Timestamp** : 30 Nov 2017 at 07:08:34 GMT  
**Warning** : A Peptide summary report will usually give a much clearer picture of MS/MS search results.  
**Top Score** : 201 for **HBB\_HUMAN**, Hemoglobin subunit beta OS=Homo sapiens GN=HBB PE=1 SV=2

## Mascot Score Histogram

Protein score is  $-10 \times \log(P)$ , where P is the probability that the observed match is a random event.

Protein scores greater than 70 are significant ( $p < 0.05$ ).

Protein scores are derived from ions scores as a non-probabilistic basis for ranking protein hits.

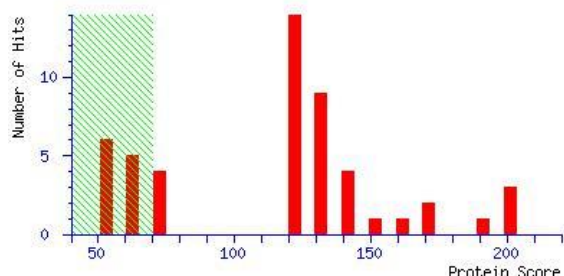

## Protein Summary Report

Format As  [Help](#)  
 Significance threshold p<  Max. number of hits

## Index

|     | Accession                   | Mass     | Score                                             | Description                                                        |
|-----|-----------------------------|----------|---------------------------------------------------|--------------------------------------------------------------------|
| 1.  | <a href="#">HBB_HUMAN</a>   | 16102    | 201                                               | Hemoglobin subunit beta OS=Homo sapiens GN=HBB PE=1 SV=2           |
| 2.  | <a href="#">HBB_PANPA</a>   | 16102    | 201                                               | Hemoglobin subunit beta OS=Pan paniscus GN=HBB PE=1 SV=2           |
| 3.  | <a href="#">HBB_PANTR</a>   | 16102    | 201                                               | Hemoglobin subunit beta OS=Pan troglodytes GN=HBB PE=1 SV=2        |
| 4.  | <a href="#">HBB_GORGO</a>   | 16074    | 188                                               | Hemoglobin subunit beta OS=Gorilla gorilla GN=HBB PE=1 SV=2        |
| 5.  | <a href="#">HBB_HYLLA</a>   | 16029    | 168                                               | Hemoglobin subunit beta OS=Hylobates lar GN=HBB PE=1 SV=1          |
| 6.  | <a href="#">HBD_SAISC</a>   | 15858    | 167                                               | Hemoglobin subunit delta OS=Saimiri sciureus GN=HBD PE=1 SV=1      |
| 7.  | <a href="#">CASA1_BOVIN</a> | 24570164 | Alpha-S1-casein OS=Bos taurus GN=CSN1S1 PE=1 SV=2 |                                                                    |
| 8.  | <a href="#">HBD_SAGMY</a>   | 15912    | 153                                               | Hemoglobin subunit delta OS=Saguinus mystax GN=HBD PE=1 SV=1       |
| 9.  | <a href="#">HBD_SAGNI</a>   | 15926    | 141                                               | Hemoglobin subunit delta OS=Saguinus nigricollis GN=HBD PE=1 SV=1  |
| 10. | <a href="#">HBB_ATEBE</a>   | 16148    | 141                                               | Hemoglobin subunit beta OS=Ateles belzebuth GN=HBB PE=1 SV=2       |
| 11. | <a href="#">HBB_ATEGE</a>   | 16148    | 141                                               | Hemoglobin subunit beta OS=Ateles geoffroyi GN=HBB PE=1 SV=2       |
| 12. | <a href="#">HBB_LAGLA</a>   | 16120    | 140                                               | Hemoglobin subunit beta OS=Lagothrix lagotricha GN=HBB PE=2 SV=3   |
| 13. | <a href="#">HBD_AOTTR</a>   | 15867    | 130                                               | Hemoglobin subunit delta OS=Aotus trivirgatus GN=HBD PE=1 SV=1     |
| 14. | <a href="#">HBB_AOTTR</a>   | 16002    | 128                                               | Hemoglobin subunit beta OS=Aotus trivirgatus GN=HBB PE=1 SV=1      |
| 15. | <a href="#">HBB_SEMEN</a>   | 15999    | 128                                               | Hemoglobin subunit beta OS=Semnopithecus entellus GN=HBB PE=1 SV=1 |
| 16. | <a href="#">HBD_ATEFU</a>   | 15882    | 128                                               | Hemoglobin subunit delta OS=Ateles fusciceps GN=HBD PE=1 SV=1      |
| 17. | <a href="#">HBB_ALOBE</a>   | 16161    | 128                                               | Hemoglobin subunit beta OS=Alouatta belzebul GN=HBB PE=2 SV=3      |
| 18. | <a href="#">HBB_ATEPA</a>   | 16150    | 128                                               | Hemoglobin subunit beta OS=Ateles paniscus GN=HBB PE=1 SV=3        |
| 19. | <a href="#">HBB_PITPI</a>   | 16147    | 128                                               | Hemoglobin subunit beta OS=Protopithecus pithecia GN=HBB PE=2 SV=3 |
| 20. | <a href="#">HBB_SAISC</a>   | 16147    | 128                                               | Hemoglobin subunit beta OS=Saimiri sciureus GN=HBB PE=1 SV=2       |

## Results List

| 1.                                                       | <a href="#">HBB_HUMAN</a> | Mass: 16102 | Score: 201 | Expect: 4.4e-015 | Matches: 13                                   |
|----------------------------------------------------------|---------------------------|-------------|------------|------------------|-----------------------------------------------|
| Hemoglobin subunit beta OS=Homo sapiens GN=HBB PE=1 SV=2 |                           |             |            |                  |                                               |
| Observed                                                 | Mr(expt)                  | Mr(calc)    | ppm        | Start            | End Miss IonsPeptide                          |
| 1126.5620                                                | 1125.5547                 | 1125.5567   | -1.76      | 97 - 105         | 0 --- K.LHVDPENFR.L                           |
| 1274.7185                                                | 1273.7112                 | 1273.7183   | -5.55      | 32 - 41          | 0 --- R.LLVVYPWTQR.F                          |
| 1314.6691                                                | 1313.6618                 | 1313.6575   | 3.26       | 19 - 31          | 0 --- K.VNVDEVGGEALGR.L                       |
| 1378.6844                                                | 1377.6771                 | 1377.6929   | -11.42     | 122 - 133        | 0 --- K.EFTPPVQAAYQK.V                        |
| 1378.6844                                                | 1377.6771                 | 1377.6929   | -11.42     | 122 - 133        | 0 20 K.EFTPPVQAAYQK.V                         |
| 1669.8772                                                | 1668.8699                 | 1668.8835   | -8.14      | 68 - 83          | 0 --- K.VLGAFSDDLHLNKLK.G                     |
| 1669.8772                                                | 1668.8699                 | 1668.8835   | -8.14      | 68 - 83          | 0 (77)K.VLGAFSDDLHLNKLK.G                     |
| 1669.8772                                                | 1668.8699                 | 1668.8835   | -8.14      | 68 - 83          | 0 91 K.VLGAFSDDLHLNKLK.G                      |
| 1797.9766                                                | 1796.9693                 | 1796.9785   | -5.09      | 67 - 83          | 1 --- K.KVLGAFSDDLHLNKLK.G                    |
| 2058.9866                                                | 2057.9793                 | 2057.9405   | 18.9       | 42 - 60          | 0 --- R.FFESFGDLSTPDVAMGNPK.V                 |
| 2074.9434                                                | 2073.9361                 | 2073.9354   | 0.36       | 42 - 60          | 0 --- R.FFESFGDLSTPDVAMGNPK.V + Oxidation (M) |
| 2228.1665                                                | 2227.1592                 | 2227.1597   | -0.21      | 10 - 31          | 1 --- K.SAVTALWGVNVDEVGGEALGR.L               |



2286.1941 2285.1868 2285.1038 36.3 42 - 62 1 --- R.FFESFGDLSTPDAVMGNPKVK.A  
No match to: 979.5460, 1034.1182, 1147.5027, 1195.6837, 1195.6837, 1195.6837, 1205.6095, 1205.6095, 1219.6508, 1219.6508, 1219.6508, 1252.6511, 1267.7006, 1337.6794, 1337.6794, 1342.6943, 1360.6827, 1365.6962, 1367.6936, 1383.7865, 1384.7319, 1475.7609, 1529.7290, 1557.7811, 1563.7914, 1572.7805, 1572.7805, 1575.7814, 1585.7865, 1641.8524, 1648.8374, 1742.8954, 1759.9335, 1763.8998, 1771.9310, 1787.9608, 1811.9208, 1816.9521, 1853.9644, 1868.9490, 1871.9698, 1877.0233, 1881.0533, 1881.0533, 1929.9923, 1951.9395, 1994.1302, 2009.0477, 2042.1072, 2042.1072, 2107.2268, 2138.1482, 2184.1758, 2202.1494, 2225.1511, 2235.2302, 2235.2302, 2268.2280, 2291.1104, 2314.1516, 2326.2490, 2330.1890, 2332.1421, 2360.1626, 3223.6489

2. [HBB\\_PANPA](#) Mass: 16102 Score: 201 Expect: 4.4e-015 Matches: 13

Hemoglobin subunit beta OS=Pan paniscus GN=HBB PE=1 SV=2

| Observed  | Mr(expt)  | Mr(calc)  | ppm    | Start | End | Miss | Ions | Peptide                                     |
|-----------|-----------|-----------|--------|-------|-----|------|------|---------------------------------------------|
| 1126.5620 | 1125.5547 | 1125.5567 | -1.76  | 97    | -   | 105  | 0    | --- K.LHVDPENFR.L                           |
| 1274.7185 | 1273.7112 | 1273.7183 | -5.55  | 32    | -   | 41   | 0    | --- R.LLVVYPWTQR.F                          |
| 1314.6691 | 1313.6618 | 1313.6575 | 3.26   | 19    | -   | 31   | 0    | --- K.VNVDEVGGEALGR.L                       |
| 1378.6844 | 1377.6771 | 1377.6929 | -11.42 | 122   | -   | 133  | 0    | --- K.EFTPPVQAAYQK.V                        |
| 1378.6844 | 1377.6771 | 1377.6929 | -11.42 | 122   | -   | 133  | 0    | 20 K.EFTPPVQAAYQK.V                         |
| 1669.8772 | 1668.8699 | 1668.8835 | -8.14  | 68    | -   | 83   | 0    | --- K.VLGAFSGLAHLNLIK.G                     |
| 1669.8772 | 1668.8699 | 1668.8835 | -8.14  | 68    | -   | 83   | 0    | (77)K.VLGAFSGLAHLNLIK.G                     |
| 1669.8772 | 1668.8699 | 1668.8835 | -8.14  | 68    | -   | 83   | 0    | 91 K.VLGAFSGLAHLNLIK.G                      |
| 1797.9766 | 1796.9693 | 1796.9785 | -5.09  | 67    | -   | 83   | 1    | --- K.KVLGAFSGLAHLNLIK.G                    |
| 2058.9866 | 2057.9793 | 2057.9405 | 18.9   | 42    | -   | 60   | 0    | --- R.FFESFGDLSTPDAVMGNPK.V                 |
| 2074.9434 | 2073.9361 | 2073.9354 | 0.36   | 42    | -   | 60   | 0    | --- R.FFESFGDLSTPDAVMGNPK.V + Oxidation (M) |
| 2228.1665 | 2227.1592 | 2227.1597 | -0.21  | 10    | -   | 31   | 1    | --- K.SAVTALWGKVNVDVGGGEALGR.L              |
| 2286.1941 | 2285.1868 | 2285.1038 | 36.3   | 42    | -   | 62   | 1    | --- R.FFESFGDLSTPDAVMGNPKVK.A               |

No match to: 979.5460, 1034.1182, 1147.5027, 1195.6837, 1195.6837, 1195.6837, 1205.6095, 1205.6095, 1219.6508, 1219.6508, 1219.6508, 1252.6511, 1267.7006, 1337.6794, 1337.6794, 1342.6943, 1360.6827, 1365.6962, 1367.6936, 1383.7865, 1384.7319, 1475.7609, 1529.7290, 1557.7811, 1563.7914, 1572.7805, 1572.7805, 1575.7814, 1585.7865, 1641.8524, 1648.8374, 1742.8954, 1759.9335, 1763.8998, 1771.9310, 1787.9608, 1811.9208, 1816.9521, 1853.9644, 1868.9490, 1871.9698, 1877.0233, 1881.0533, 1881.0533, 1929.9923, 1951.9395, 1994.1302, 2009.0477, 2042.1072, 2042.1072, 2107.2268, 2138.1482, 2184.1758, 2202.1494, 2225.1511, 2235.2302, 2235.2302, 2268.2280, 2291.1104, 2314.1516, 2326.2490, 2330.1890, 2332.1421, 2360.1626, 3223.6489

3. [HBB\\_PANTR](#) Mass: 16102 Score: 201 Expect: 4.4e-015 Matches: 13

Hemoglobin subunit beta OS=Pan troglodytes GN=HBB PE=1 SV=2

| Observed  | Mr(expt)  | Mr(calc)  | ppm    | Start | End | Miss | Ions | Peptide                                     |
|-----------|-----------|-----------|--------|-------|-----|------|------|---------------------------------------------|
| 1126.5620 | 1125.5547 | 1125.5567 | -1.76  | 97    | -   | 105  | 0    | --- K.LHVDPENFR.L                           |
| 1274.7185 | 1273.7112 | 1273.7183 | -5.55  | 32    | -   | 41   | 0    | --- R.LLVVYPWTQR.F                          |
| 1314.6691 | 1313.6618 | 1313.6575 | 3.26   | 19    | -   | 31   | 0    | --- K.VNVDEVGGEALGR.L                       |
| 1378.6844 | 1377.6771 | 1377.6929 | -11.42 | 122   | -   | 133  | 0    | --- K.EFTPPVQAAYQK.V                        |
| 1378.6844 | 1377.6771 | 1377.6929 | -11.42 | 122   | -   | 133  | 0    | 20 K.EFTPPVQAAYQK.V                         |
| 1669.8772 | 1668.8699 | 1668.8835 | -8.14  | 68    | -   | 83   | 0    | --- K.VLGAFSGLAHLNLIK.G                     |
| 1669.8772 | 1668.8699 | 1668.8835 | -8.14  | 68    | -   | 83   | 0    | (77)K.VLGAFSGLAHLNLIK.G                     |
| 1669.8772 | 1668.8699 | 1668.8835 | -8.14  | 68    | -   | 83   | 0    | 91 K.VLGAFSGLAHLNLIK.G                      |
| 1797.9766 | 1796.9693 | 1796.9785 | -5.09  | 67    | -   | 83   | 1    | --- K.KVLGAFSGLAHLNLIK.G                    |
| 2058.9866 | 2057.9793 | 2057.9405 | 18.9   | 42    | -   | 60   | 0    | --- R.FFESFGDLSTPDAVMGNPK.V                 |
| 2074.9434 | 2073.9361 | 2073.9354 | 0.36   | 42    | -   | 60   | 0    | --- R.FFESFGDLSTPDAVMGNPK.V + Oxidation (M) |
| 2228.1665 | 2227.1592 | 2227.1597 | -0.21  | 10    | -   | 31   | 1    | --- K.SAVTALWGKVNVDVGGGEALGR.L              |
| 2286.1941 | 2285.1868 | 2285.1038 | 36.3   | 42    | -   | 62   | 1    | --- R.FFESFGDLSTPDAVMGNPKVK.A               |

No match to: 979.5460, 1034.1182, 1147.5027, 1195.6837, 1195.6837, 1195.6837, 1205.6095, 1205.6095, 1219.6508, 1219.6508, 1219.6508, 1252.6511, 1267.7006, 1337.6794, 1337.6794, 1342.6943, 1360.6827, 1365.6962, 1367.6936, 1383.7865, 1384.7319, 1475.7609, 1529.7290, 1557.7811, 1563.7914, 1572.7805, 1572.7805, 1575.7814, 1585.7865, 1641.8524, 1648.8374, 1742.8954, 1759.9335, 1763.8998, 1771.9310, 1787.9608, 1811.9208, 1816.9521, 1853.9644, 1868.9490, 1871.9698, 1877.0233, 1881.0533, 1881.0533, 1929.9923, 1951.9395, 1994.1302, 2009.0477, 2042.1072, 2042.1072, 2107.2268, 2138.1482, 2184.1758, 2202.1494, 2225.1511, 2235.2302, 2235.2302, 2268.2280, 2291.1104, 2314.1516, 2326.2490, 2330.1890, 2332.1421, 2360.1626, 3223.6489

4. [HBB\\_GORGO](#) Mass: 16074 Score: 188 Expect: 8.8e-014 Matches: 12

Hemoglobin subunit beta OS=Gorilla gorilla GN=HBB PE=1 SV=2

| Observed  | Mr(expt)  | Mr(calc)  | ppm    | Start | End | Miss | Ions | Peptide                                     |
|-----------|-----------|-----------|--------|-------|-----|------|------|---------------------------------------------|
| 1274.7185 | 1273.7112 | 1273.7183 | -5.55  | 32    | -   | 41   | 0    | --- R.LLVVYPWTQR.F                          |
| 1314.6691 | 1313.6618 | 1313.6575 | 3.26   | 19    | -   | 31   | 0    | --- K.VNVDEVGGEALGR.L                       |
| 1378.6844 | 1377.6771 | 1377.6929 | -11.42 | 122   | -   | 133  | 0    | --- K.EFTPPVQAAYQK.V                        |
| 1378.6844 | 1377.6771 | 1377.6929 | -11.42 | 122   | -   | 133  | 0    | 20 K.EFTPPVQAAYQK.V                         |
| 1669.8772 | 1668.8699 | 1668.8835 | -8.14  | 68    | -   | 83   | 0    | --- K.VLGAFSGLAHLNLIK.G                     |
| 1669.8772 | 1668.8699 | 1668.8835 | -8.14  | 68    | -   | 83   | 0    | (77)K.VLGAFSGLAHLNLIK.G                     |
| 1669.8772 | 1668.8699 | 1668.8835 | -8.14  | 68    | -   | 83   | 0    | 91 K.VLGAFSGLAHLNLIK.G                      |
| 1797.9766 | 1796.9693 | 1796.9785 | -5.09  | 67    | -   | 83   | 1    | --- K.KVLGAFSGLAHLNLIK.G                    |
| 2058.9866 | 2057.9793 | 2057.9405 | 18.9   | 42    | -   | 60   | 0    | --- R.FFESFGDLSTPDAVMGNPK.V                 |
| 2074.9434 | 2073.9361 | 2073.9354 | 0.36   | 42    | -   | 60   | 0    | --- R.FFESFGDLSTPDAVMGNPK.V + Oxidation (M) |
| 2228.1665 | 2227.1592 | 2227.1597 | -0.21  | 10    | -   | 31   | 1    | --- K.SAVTALWGKVNVDVGGGEALGR.L              |
| 2286.1941 | 2285.1868 | 2285.1038 | 36.3   | 42    | -   | 62   | 1    | --- R.FFESFGDLSTPDAVMGNPKVK.A               |

No match to: 979.5460, 1034.1182, 1126.5620, 1147.5027, 1195.6837, 1195.6837, 1195.6837, 1205.6095, 1205.6095, 1219.6508, 1219.6508, 1219.6508, 1252.6511, 1267.7006, 1337.6794, 1337.6794, 1342.6943, 1360.6827, 1365.6962, 1367.6936, 1383.7865, 1384.7319, 1475.7609, 1529.7290, 1557.7811, 1563.7914, 1572.7805, 1572.7805, 1575.7814, 1585.7865, 1641.8524, 1648.8374, 1742.8954, 1759.9335, 1763.8998, 1771.9310, 1787.9608, 1811.9208, 1816.9521, 1853.9644, 1868.9490, 1871.9698, 1877.0233, 1881.0533, 1881.0533, 1929.9923, 1951.9395, 1994.1302, 2009.0477, 2042.1072, 2042.1072, 2107.2268, 2138.1482, 2184.1758, 2202.1494, 2225.1511, 2235.2302, 2235.2302, 2268.2280, 2291.1104, 2314.1516, 2326.2490, 2330.1890, 2332.1421, 2360.1626, 3223.6489

5. [HBB\\_HYLLA](#) Mass: 16029 Score: 168 Expect: 8.8e-012 Matches: 11

Hemoglobin subunit beta OS=Hylobates lar GN=HBB PE=1 SV=1

| Observed | Mr(expt) | Mr(calc) | ppm | Start | End | Miss | Ions | Peptide |
|----------|----------|----------|-----|-------|-----|------|------|---------|
|----------|----------|----------|-----|-------|-----|------|------|---------|



|           |           |           |       |    |   |     |   |      |                                        |
|-----------|-----------|-----------|-------|----|---|-----|---|------|----------------------------------------|
| 1126.5620 | 1125.5547 | 1125.5567 | -1.76 | 96 | - | 104 | 0 | ---  | K.LHVDPENFR.L                          |
| 1274.7185 | 1273.7112 | 1273.7183 | -5.55 | 31 | - | 40  | 0 | ---  | R.LLVVYPWTQR.F                         |
| 1314.6691 | 1313.6618 | 1313.6575 | 3.26  | 18 | - | 30  | 0 | ---  | K.VNVDEVGGEALGR.L                      |
| 1669.8772 | 1668.8699 | 1668.8835 | -8.14 | 67 | - | 82  | 0 | ---  | K.VLGAFSDDLHLNLK.G                     |
| 1669.8772 | 1668.8699 | 1668.8835 | -8.14 | 67 | - | 82  | 0 | (77) | K.VLGAFSDDLHLNLK.G                     |
| 1669.8772 | 1668.8699 | 1668.8835 | -8.14 | 67 | - | 82  | 0 | 91   | K.VLGAFSDDLHLNLK.G                     |
| 1797.9766 | 1796.9693 | 1796.9785 | -5.09 | 66 | - | 82  | 1 | ---  | K.KVLGAFSDDLHLNLK.G                    |
| 2058.9866 | 2057.9793 | 2057.9405 | 18.9  | 41 | - | 59  | 0 | ---  | R.FFESFGLSTPDVAMGNPK.V                 |
| 2074.9434 | 2073.9361 | 2073.9354 | 0.36  | 41 | - | 59  | 0 | ---  | R.FFESFGLSTPDVAMGNPK.V + Oxidation (M) |
| 2228.1665 | 2227.1592 | 2227.1597 | -0.21 | 9  | - | 30  | 1 | ---  | K.SAVTALWGKVNVDVGEALGR.L               |
| 2286.1941 | 2285.1868 | 2285.1038 | 36.3  | 41 | - | 61  | 1 | ---  | R.FFESFGLSTPDVAMGNPKV.K.A              |

No match to: 979.5460, 1034.1182, 1147.5027, 1195.6837, 1195.6837, 1195.6837, 1205.6095, 1205.6095, 1219.6508, 1219.6508, 1219.6508, 1252.6511, 1267.7006, 1337.6794, 1337.6794, 1342.6943, 1360.6827, 1365.6962, 1367.6936, 1378.6844, 1378.6844, 1383.7865, 1384.7319, 1475.7609, 1529.7290, 1557.7811, 1563.7914, 1572.7805, 1572.7805, 1575.7814, 1585.7865, 1641.8524, 1648.8374, 1742.8954, 1759.9335, 1763.8998, 1771.9310, 1787.9608, 1811.9208, 1816.9521, 1853.9644, 1868.9490, 1871.9698, 1877.0233, 1881.0533, 1881.0533, 1929.9923, 1951.9395, 1994.1302, 2009.0477, 2042.1072, 2042.1072, 2107.2268, 2138.1482, 2184.1758, 2202.1494, 2225.1511, 2235.2302, 2235.2302, 2268.2280, 2291.1104, 2314.1516, 2326.2490, 2330.1890, 2332.1421, 2360.1626, 3223.6489

6. [HBD\\_SAISC](#) Mass: 15858 Score: 167 Expect: 1.1e-011 Matches: 10

Hemoglobin subunit delta OS=Saimiri sciureus GN=HBD PE=1 SV=1

| Observed  | Mr(expt)  | Mr(calc)  | ppm    | Start | End | Miss | IonsPeptide                     |
|-----------|-----------|-----------|--------|-------|-----|------|---------------------------------|
| 1126.5620 | 1125.5547 | 1125.5567 | -1.76  | 96    | -   | 104  | 0 --- K.LHVDPENFR.L             |
| 1274.7185 | 1273.7112 | 1273.7183 | -5.55  | 31    | -   | 40   | 0 --- R.LLVVYPWTQR.F            |
| 1314.6691 | 1313.6618 | 1313.6575 | 3.26   | 18    | -   | 30   | 0 --- K.VNVDEVGGEALGR.L         |
| 1669.8772 | 1668.8699 | 1668.8835 | -8.14  | 67    | -   | 82   | 0 --- K.VLGAFSDDLHLNLK.G        |
| 1669.8772 | 1668.8699 | 1668.8835 | -8.14  | 67    | -   | 82   | 0 (77) K.VLGAFSDDLHLNLK.G       |
| 1669.8772 | 1668.8699 | 1668.8835 | -8.14  | 67    | -   | 82   | 0 91 K.VLGAFSDDLHLNLK.G         |
| 1797.9766 | 1796.9693 | 1796.9785 | -5.09  | 66    | -   | 82   | 1 --- K.KVLGAFSDDLHLNLK.G       |
| 1811.9208 | 1810.9135 | 1810.9577 | -24.41 | 1     | -   | 17   | 1 --- -.VHLTGDEKSAVAALWSK.V     |
| 2202.1494 | 2201.1421 | 2201.0827 | 27.0   | 41    | -   | 61   | 1 --- R.FFESFGLSSADAVMGNPKV.K.A |
| 2228.1665 | 2227.1592 | 2227.1597 | -0.21  | 9     | -   | 30   | 1 --- K.SAVAALWSKVNVDVGEALGR.L  |

No match to: 979.5460, 1034.1182, 1147.5027, 1195.6837, 1195.6837, 1195.6837, 1205.6095, 1205.6095, 1219.6508, 1219.6508, 1219.6508, 1252.6511, 1267.7006, 1337.6794, 1337.6794, 1342.6943, 1360.6827, 1365.6962, 1367.6936, 1378.6844, 1378.6844, 1383.7865, 1384.7319, 1475.7609, 1529.7290, 1557.7811, 1563.7914, 1572.7805, 1572.7805, 1575.7814, 1585.7865, 1641.8524, 1648.8374, 1742.8954, 1759.9335, 1763.8998, 1771.9310, 1787.9608, 1816.9521, 1853.9644, 1868.9490, 1871.9698, 1877.0233, 1881.0533, 1881.0533, 1929.9923, 1951.9395, 1994.1302, 2009.0477, 2042.1072, 2042.1072, 2058.9866, 2074.9434, 2107.2268, 2138.1482, 2184.1758, 2202.1494, 2225.1511, 2235.2302, 2235.2302, 2268.2280, 2286.1941, 2291.1104, 2314.1516, 2326.2490, 2330.1890, 2332.1421, 2360.1626, 3223.6489

7. [CASA1\\_BOVIN](#) Mass: 24570 Score: 164 Expect: 2.2e-011 Matches: 11

Alpha-S1-casein OS=Bos taurus GN=CSN1S1 PE=1 SV=2

| Observed  | Mr(expt)  | Mr(calc)  | ppm   | Start | End | Miss | IonsPeptide                                          |
|-----------|-----------|-----------|-------|-------|-----|------|------------------------------------------------------|
| 1267.7006 | 1266.6933 | 1266.6972 | -3.05 | 106   | -   | 115  | 0 --- R.YLGYLEQLLR.L                                 |
| 1337.6794 | 1336.6721 | 1336.6735 | -1.04 | 95    | -   | 105  | 1 --- K.HIQKEDVPSEY.Y                                |
| 1337.6794 | 1336.6721 | 1336.6735 | -1.04 | 95    | -   | 105  | 1 42 K.HIQKEDVPSEY.Y                                 |
| 1384.7319 | 1383.7246 | 1383.7227 | 1.37  | 38    | -   | 49   | 0 --- R.FFVAPFPEVFGK.E                               |
| 1641.8524 | 1640.8451 | 1640.8603 | -9.23 | 38    | -   | 51   | 1 --- R.FFVAPFPEVFGKEK.V                             |
| 1759.9335 | 1758.9262 | 1758.9377 | -6.50 | 23    | -   | 37   | 0 --- K.HQGLPQEVNLNLLR.F                             |
| 1871.9698 | 1870.9625 | 1870.9788 | -8.72 | 119   | -   | 134  | 1 --- K.YKVPQLEIVPNSAEER.L                           |
| 2235.2302 | 2234.2229 | 2234.2283 | -2.43 | 19    | -   | 37   | 1 --- K.HPIKHQGLPQEVNLNLLR.F                         |
| 2235.2302 | 2234.2229 | 2234.2283 | -2.43 | 19    | -   | 37   | 1 51 K.HPIKHQGLPQEVNLNLLR.F                          |
| 2332.1421 | 2331.1348 | 2331.1245 | 4.42  | 148   | -   | 166  | 0 --- K.EPMIGVNQELAYFYPELFR.Q + Oxidation (M)        |
| 3223.6489 | 3222.6416 | 3222.5808 | 18.9  | 140   | -   | 166  | 1 --- K.EGIHAQQKPMIGVNQELAYFYPELFR.Q + Oxidation (M) |

No match to: 979.5460, 1034.1182, 1126.5620, 1147.5027, 1195.6837, 1195.6837, 1195.6837, 1205.6095, 1205.6095, 1219.6508, 1219.6508, 1219.6508, 1252.6511, 1267.7006, 1337.6794, 1337.6794, 1342.6943, 1360.6827, 1365.6962, 1367.6936, 1378.6844, 1378.6844, 1383.7865, 1384.7319, 1475.7609, 1529.7290, 1557.7811, 1563.7914, 1572.7805, 1572.7805, 1575.7814, 1585.7865, 1641.8524, 1648.8374, 1669.8772, 1669.8772, 1669.8772, 1742.8954, 1763.8998, 1771.9310, 1787.9608, 1797.9766, 1811.9208, 1816.9521, 1853.9644, 1868.9490, 1877.0233, 1881.0533, 1881.0533, 1929.9923, 1951.9395, 1994.1302, 2009.0477, 2042.1072, 2042.1072, 2058.9866, 2074.9434, 2107.2268, 2138.1482, 2184.1758, 2202.1494, 2225.1511, 2235.2302, 2268.2280, 2286.1941, 2291.1104, 2314.1516, 2326.2490, 2330.1890, 2360.1626

8. [HBD\\_SAGMY](#) Mass: 15912 Score: 153 Expect: 2.8e-010 Matches: 9

Hemoglobin subunit delta OS=Saguinus mystax GN=HBD PE=1 SV=1

| Observed  | Mr(expt)  | Mr(calc)  | ppm    | Start | End | Miss | IonsPeptide                    |
|-----------|-----------|-----------|--------|-------|-----|------|--------------------------------|
| 1126.5620 | 1125.5547 | 1125.5567 | -1.76  | 96    | -   | 104  | 0 --- K.LHVDPENFR.L            |
| 1274.7185 | 1273.7112 | 1273.7183 | -5.55  | 31    | -   | 40   | 0 --- R.LLVVYPWTQR.F           |
| 1314.6691 | 1313.6618 | 1313.6575 | 3.26   | 18    | -   | 30   | 0 --- K.VNVDEVGGEALGR.L        |
| 1669.8772 | 1668.8699 | 1668.8835 | -8.14  | 67    | -   | 82   | 0 --- K.VLGAFSDDLHLNLK.G       |
| 1669.8772 | 1668.8699 | 1668.8835 | -8.14  | 67    | -   | 82   | 0 (77) K.VLGAFSDDLHLNLK.G      |
| 1669.8772 | 1668.8699 | 1668.8835 | -8.14  | 67    | -   | 82   | 0 91 K.VLGAFSDDLHLNLK.G        |
| 1797.9766 | 1796.9693 | 1796.9785 | -5.09  | 66    | -   | 82   | 1 --- K.KVLGAFSDDLHLNLK.G      |
| 1811.9208 | 1810.9135 | 1810.9577 | -24.41 | 1     | -   | 17   | 1 --- -.VHLTGDEKSAVAALWSK.V    |
| 2228.1665 | 2227.1592 | 2227.1597 | -0.21  | 9     | -   | 30   | 1 --- K.SAVAALWSKVNVDVGEALGR.L |

No match to: 979.5460, 1034.1182, 1147.5027, 1195.6837, 1195.6837, 1195.6837, 1205.6095, 1205.6095, 1219.6508, 1219.6508, 1219.6508, 1252.6511, 1267.7006, 1337.6794, 1337.6794, 1342.6943, 1360.6827, 1365.6962, 1367.6936, 1378.6844, 1378.6844, 1383.7865, 1384.7319, 1475.7609, 1529.7290, 1557.7811, 1563.7914, 1572.7805, 1572.7805, 1575.7814, 1585.7865, 1641.8524, 1648.8374, 1742.8954, 1759.9335, 1763.8998, 1771.9310, 1787.9608, 1816.9521, 1853.9644, 1868.9490, 1871.9698, 1877.0233, 1881.0533, 1881.0533, 1929.9923, 1951.9395, 1994.1302, 2009.0477, 2042.1072, 2042.1072, 2058.9866, 2074.9434, 2107.2268, 2138.1482, 2184.1758, 2202.1494, 2225.1511, 2235.2302, 2235.2302, 2268.2280, 2286.1941, 2291.1104, 2314.1516, 2326.2490, 2330.1890, 2332.1421, 2360.1626, 3223.6489

9. [HBD\\_SAGNI](#) Mass: 15926 Score: 141 Expect: 4.4e-009 Matches: 8



Hemoglobin subunit delta OS=Saguinus nigricollis GN=HBDPE=1 SV=1

| Observed  | Mr(expt)  | Mr(calc)  | ppm   | Start | End   | Miss | Ions | Peptide                  |
|-----------|-----------|-----------|-------|-------|-------|------|------|--------------------------|
| 1126.5620 | 1125.5547 | 1125.5567 | -1.76 | 96    | - 104 | 0    | ---  | K.LHVDPENFR.L            |
| 1274.7185 | 1273.7112 | 1273.7183 | -5.55 | 31    | - 40  | 0    | ---  | R.LLVVYPWTQR.F           |
| 1314.6691 | 1313.6618 | 1313.6575 | 3.26  | 18    | - 30  | 0    | ---  | K.VNVDEVGGEALGR.L        |
| 1669.8772 | 1668.8699 | 1668.8835 | -8.14 | 67    | - 82  | 0    | ---  | K.VLGAFSDDLHLNLLK.G      |
| 1669.8772 | 1668.8699 | 1668.8835 | -8.14 | 67    | - 82  | 0    | (77) | K.VLGAFSDDLHLNLLK.G      |
| 1669.8772 | 1668.8699 | 1668.8835 | -8.14 | 67    | - 82  | 0    | 91   | K.VLGAFSDDLHLNLLK.G      |
| 1797.9766 | 1796.9693 | 1796.9785 | -5.09 | 66    | - 82  | 1    | ---  | K.KVLGAFSDDLHLNLLK.G     |
| 2228.1665 | 2227.1592 | 2227.1597 | -0.21 | 9     | - 30  | 1    | ---  | K.SAVALWSKVNDEVGGEALGR.L |

No match to: 979.5460, 1034.1182, 1147.5027, 1195.6837, 1195.6837, 1195.6837, 1205.6095, 1205.6095, 1219.6508, 1219.6508, 1219.6508, 1252.6511, 1267.7006, 1337.6794, 1337.6794, 1342.6943, 1360.6827, 1365.6962, 1367.6936, 1378.6844, 1378.6844, 1383.7865, 1384.7319, 1475.7609, 1529.7290, 1557.7811, 1563.7914, 1572.7805, 1572.7805, 1575.7814, 1585.7865, 1641.8524, 1648.8374, 1742.8954, 1759.9335, 1763.8998, 1771.9310, 1787.9608, 1811.9208, 1816.9521, 1853.9644, 1868.9490, 1871.9698, 1877.0233, 1881.0533, 1881.0533, 1929.9923, 1951.9395, 1994.1302, 2009.0477, 2042.1072, 2042.1072, 2058.9866, 2074.9434, 2107.2268, 2138.1482, 2184.1758, 2202.1494, 2225.1511, 2235.2302, 2235.2302, 2268.2280, 2286.1941, 2291.1104, 2314.1516, 2326.2490, 2330.1890, 2332.1421, 2360.1626, 3223.6489

10. [HBB\\_ATEBE](#)Mass: 16148 Score: 141 Expect: 4.4e-009 Matches: 8

Hemoglobin subunit beta OS=Ateles belzebuth GN=HBB PE=1 SV=2

| Observed  | Mr(expt)  | Mr(calc)  | ppm   | Start | End   | Miss | Ions | Peptide                                |
|-----------|-----------|-----------|-------|-------|-------|------|------|----------------------------------------|
| 1126.5620 | 1125.5547 | 1125.5567 | -1.76 | 97    | - 105 | 0    | ---  | K.LHVDPENFR.L                          |
| 1274.7185 | 1273.7112 | 1273.7183 | -5.55 | 32    | - 41  | 0    | ---  | R.LLVVYPWTQR.F                         |
| 1314.6691 | 1313.6618 | 1313.6575 | 3.26  | 19    | - 31  | 0    | ---  | K.VNVDEVGGEALGR.L                      |
| 1669.8772 | 1668.8699 | 1668.8835 | -8.14 | 68    | - 83  | 0    | ---  | K.VLGAFSDDLHLNLLK.G                    |
| 1669.8772 | 1668.8699 | 1668.8835 | -8.14 | 68    | - 83  | 0    | (77) | K.VLGAFSDDLHLNLLK.G                    |
| 1669.8772 | 1668.8699 | 1668.8835 | -8.14 | 68    | - 83  | 0    | 91K  | K.VLGAFSDDLHLNLLK.G                    |
| 1797.9766 | 1796.9693 | 1796.9785 | -5.09 | 67    | - 83  | 1    | ---  | K.KVLGAFSDDLHLNLLK.G                   |
| 2332.1421 | 2331.1348 | 2331.1093 | 10.9  | 42    | - 62  | 1    | ---  | R.FFESFGLSTPDVMSNPKV.K + Oxidation (M) |

No match to: 979.5460, 1034.1182, 1147.5027, 1195.6837, 1195.6837, 1195.6837, 1205.6095, 1205.6095, 1219.6508, 1219.6508, 1219.6508, 1252.6511, 1267.7006, 1337.6794, 1337.6794, 1342.6943, 1360.6827, 1365.6962, 1367.6936, 1378.6844, 1378.6844, 1383.7865, 1384.7319, 1475.7609, 1529.7290, 1557.7811, 1563.7914, 1572.7805, 1572.7805, 1575.7814, 1585.7865, 1641.8524, 1648.8374, 1742.8954, 1759.9335, 1763.8998, 1771.9310, 1787.9608, 1811.9208, 1816.9521, 1853.9644, 1868.9490, 1871.9698, 1877.0233, 1881.0533, 1881.0533, 1929.9923, 1951.9395, 1994.1302, 2009.0477, 2042.1072, 2042.1072, 2058.9866, 2074.9434, 2107.2268, 2138.1482, 2184.1758, 2202.1494, 2225.1511, 2228.1665, 2235.2302, 2235.2302, 2268.2280, 2286.1941, 2291.1104, 2314.1516, 2326.2490, 2330.1890, 2360.1626, 3223.6489

11. [HBB\\_ATEGE](#)Mass: 16148 Score: 141 Expect: 4.4e-009 Matches: 8

Hemoglobin subunit beta OS=Ateles geoffroyi GN=HBB PE=1 SV=2

| Observed  | Mr(expt)  | Mr(calc)  | ppm   | Start | End   | Miss | Ions | Peptide                                |
|-----------|-----------|-----------|-------|-------|-------|------|------|----------------------------------------|
| 1126.5620 | 1125.5547 | 1125.5567 | -1.76 | 97    | - 105 | 0    | ---  | K.LHVDPENFR.L                          |
| 1274.7185 | 1273.7112 | 1273.7183 | -5.55 | 32    | - 41  | 0    | ---  | R.LLVVYPWTQR.F                         |
| 1314.6691 | 1313.6618 | 1313.6575 | 3.26  | 19    | - 31  | 0    | ---  | K.VNVDEVGGEALGR.L                      |
| 1669.8772 | 1668.8699 | 1668.8835 | -8.14 | 68    | - 83  | 0    | ---  | K.VLGAFSDDLHLNLLK.G                    |
| 1669.8772 | 1668.8699 | 1668.8835 | -8.14 | 68    | - 83  | 0    | (77) | K.VLGAFSDDLHLNLLK.G                    |
| 1669.8772 | 1668.8699 | 1668.8835 | -8.14 | 68    | - 83  | 0    | 91K  | K.VLGAFSDDLHLNLLK.G                    |
| 1797.9766 | 1796.9693 | 1796.9785 | -5.09 | 67    | - 83  | 1    | ---  | K.KVLGAFSDDLHLNLLK.G                   |
| 2332.1421 | 2331.1348 | 2331.1093 | 10.9  | 42    | - 62  | 1    | ---  | R.FFESFGLSTPDVMSNPKV.K + Oxidation (M) |

No match to: 979.5460, 1034.1182, 1147.5027, 1195.6837, 1195.6837, 1195.6837, 1205.6095, 1205.6095, 1219.6508, 1219.6508, 1219.6508, 1252.6511, 1267.7006, 1337.6794, 1337.6794, 1342.6943, 1360.6827, 1365.6962, 1367.6936, 1378.6844, 1378.6844, 1383.7865, 1384.7319, 1475.7609, 1529.7290, 1557.7811, 1563.7914, 1572.7805, 1572.7805, 1575.7814, 1585.7865, 1641.8524, 1648.8374, 1742.8954, 1759.9335, 1763.8998, 1771.9310, 1787.9608, 1811.9208, 1816.9521, 1853.9644, 1868.9490, 1871.9698, 1877.0233, 1881.0533, 1881.0533, 1929.9923, 1951.9395, 1994.1302, 2009.0477, 2042.1072, 2042.1072, 2058.9866, 2074.9434, 2107.2268, 2138.1482, 2184.1758, 2202.1494, 2225.1511, 2228.1665, 2235.2302, 2235.2302, 2268.2280, 2286.1941, 2291.1104, 2314.1516, 2326.2490, 2330.1890, 2360.1626, 3223.6489

12. [HBB\\_LAGLA](#)Mass: 16120 Score: 140 Expect: 5.5e-009 Matches: 8

Hemoglobin subunit beta OS=Lagothrix lagotricha GN=HBB PE=2 SV=3

| Observed  | Mr(expt)  | Mr(calc)  | ppm   | Start | End   | Miss | Ions | Peptide               |
|-----------|-----------|-----------|-------|-------|-------|------|------|-----------------------|
| 1126.5620 | 1125.5547 | 1125.5567 | -1.76 | 97    | - 105 | 0    | ---  | K.LHVDPENFR.L         |
| 1274.7185 | 1273.7112 | 1273.7183 | -5.55 | 32    | - 41  | 0    | ---  | R.LLVVYPWTQR.F        |
| 1314.6691 | 1313.6618 | 1313.6575 | 3.26  | 19    | - 31  | 0    | ---  | K.VNVDEVGGEALGR.L     |
| 1669.8772 | 1668.8699 | 1668.8835 | -8.14 | 68    | - 83  | 0    | ---  | K.VLGAFSDDLHLNLLK.G   |
| 1669.8772 | 1668.8699 | 1668.8835 | -8.14 | 68    | - 83  | 0    | (77) | K.VLGAFSDDLHLNLLK.G   |
| 1669.8772 | 1668.8699 | 1668.8835 | -8.14 | 68    | - 83  | 0    | 91K  | K.VLGAFSDDLHLNLLK.G   |
| 1797.9766 | 1796.9693 | 1796.9785 | -5.09 | 67    | - 83  | 1    | ---  | K.KVLGAFSDDLHLNLLK.G  |
| 2074.9434 | 2073.9361 | 2073.9354 | 0.36  | 42    | - 60  | 0    | ---  | R.FFDSFGLSTPDVMSNPK.V |

No match to: 979.5460, 1034.1182, 1147.5027, 1195.6837, 1195.6837, 1195.6837, 1205.6095, 1205.6095, 1219.6508, 1219.6508, 1219.6508, 1252.6511, 1267.7006, 1337.6794, 1337.6794, 1342.6943, 1360.6827, 1365.6962, 1367.6936, 1378.6844, 1378.6844, 1383.7865, 1384.7319, 1475.7609, 1529.7290, 1557.7811, 1563.7914, 1572.7805, 1572.7805, 1575.7814, 1585.7865, 1641.8524, 1648.8374, 1742.8954, 1759.9335, 1763.8998, 1771.9310, 1787.9608, 1811.9208, 1816.9521, 1853.9644, 1868.9490, 1871.9698, 1877.0233, 1881.0533, 1881.0533, 1929.9923, 1951.9395, 1994.1302, 2009.0477, 2042.1072, 2042.1072, 2058.9866, 2107.2268, 2138.1482, 2184.1758, 2202.1494, 2225.1511, 2228.1665, 2235.2302, 2235.2302, 2268.2280, 2286.1941, 2291.1104, 2314.1516, 2326.2490, 2330.1890, 2332.1421, 2360.1626, 3223.6489

13. [HBD\\_AOTTR](#)Mass: 15867 Score: 130 Expect: 5.5e-008 Matches: 7

Hemoglobin subunit delta OS=Aotus trivirgatus GN=HBD PE=1 SV=1

| Observed  | Mr(expt)  | Mr(calc)  | ppm   | Start | End   | Miss | Ions | Peptide              |
|-----------|-----------|-----------|-------|-------|-------|------|------|----------------------|
| 1126.5620 | 1125.5547 | 1125.5567 | -1.76 | 96    | - 104 | 0    | ---  | K.LHVDPENFR.L        |
| 1274.7185 | 1273.7112 | 1273.7183 | -5.55 | 31    | - 40  | 0    | ---  | R.LLVVYPWTQR.F       |
| 1669.8772 | 1668.8699 | 1668.8835 | -8.14 | 67    | - 82  | 0    | ---  | K.VLGAFSDDLHLNLLK.G  |
| 1669.8772 | 1668.8699 | 1668.8835 | -8.14 | 67    | - 82  | 0    | (77) | K.VLGAFSDDLHLNLLK.G  |
| 1669.8772 | 1668.8699 | 1668.8835 | -8.14 | 67    | - 82  | 0    | 91K  | K.VLGAFSDDLHLNLLK.G  |
| 1797.9766 | 1796.9693 | 1796.9785 | -5.09 | 66    | - 82  | 1    | ---  | K.KVLGAFSDDLHLNLLK.G |



2228.1665 2227.1592 2227.0983 27.3 41 - 61 1 --- R.FFESFGALSSPDAVMGNPKVK.A  
No match to: 979.5460, 1034.1182, 1147.5027, 1195.6837, 1195.6837, 1195.6837, 1205.6095, 1205.6095, 1219.6508, 1219.6508, 1219.6508, 1252.6511, 1267.7006, 1314.6691, 1337.6794, 1337.6794, 1342.6943, 1360.6827, 1365.6962, 1367.6936, 1378.6844, 1378.6844, 1383.7865, 1384.7319, 1475.7609, 1529.7290, 1557.7811, 1563.7914, 1572.7805, 1572.7805, 1575.7814, 1585.7865, 1641.8524, 1648.8374, 1742.8954, 1759.9335, 1763.8998, 1771.9310, 1787.9608, 1811.9208, 1816.9521, 1853.9644, 1868.9490, 1871.9698, 1877.0233, 1881.0533, 1881.0533, 1929.9923, 1951.9395, 1994.1302, 2009.0477, 2042.1072, 2042.1072, 2058.9866, 2074.9434, 2107.2268, 2138.1482, 2184.1758, 2202.1494, 2225.1511, 2235.2302, 2235.2302, 2268.2280, 2286.1941, 2291.1104, 2314.1516, 2326.2490, 2330.1890, 2332.1421, 2360.1626, 3223.6489

14. [HBB\\_AOTTR](#) Mass: 16002 Score: 128 Expect: 8.8e-008 Matches: 7

Hemoglobin subunit beta OS=Aotus trivirgatus GN=HBB PE=1 SV=1  
Observed Mr(expt) Mr(calc) ppm Start End Miss Ions Peptide  
1126.5620 1125.5547 1125.5567 -1.76 96 - 104 0 --- K.LHVDPENFR.L  
1274.7185 1273.7112 1273.7183 -5.55 31 - 40 0 --- R.LLVVYPWTQR.F  
1314.6691 1313.6618 1313.6575 3.26 18 - 30 0 --- K.VNVDEVGGEALGR.L  
1669.8772 1668.8699 1668.8835 -8.14 67 - 82 0 --- K.VLGAFSDDLHLNLIK.G  
1669.8772 1668.8699 1668.8835 -8.14 67 - 82 0 (77) K.VLGAFSDDLHLNLIK.G  
1669.8772 1668.8699 1668.8835 -8.14 67 - 82 0 91 K.VLGAFSDDLHLNLIK.G  
1797.9766 1796.9693 1796.9785 -5.09 66 - 82 1 --- K.KVLGAFSDDLHLNLIK.G

No match to: 979.5460, 1034.1182, 1147.5027, 1195.6837, 1195.6837, 1195.6837, 1205.6095, 1205.6095, 1219.6508, 1219.6508, 1219.6508, 1252.6511, 1267.7006, 1337.6794, 1337.6794, 1342.6943, 1360.6827, 1365.6962, 1367.6936, 1378.6844, 1378.6844, 1383.7865, 1384.7319, 1475.7609, 1529.7290, 1557.7811, 1563.7914, 1572.7805, 1572.7805, 1575.7814, 1585.7865, 1641.8524, 1648.8374, 1742.8954, 1759.9335, 1763.8998, 1771.9310, 1787.9608, 1811.9208, 1816.9521, 1853.9644, 1868.9490, 1871.9698, 1877.0233, 1881.0533, 1881.0533, 1929.9923, 1951.9395, 1994.1302, 2009.0477, 2042.1072, 2042.1072, 2058.9866, 2074.9434, 2107.2268, 2138.1482, 2184.1758, 2202.1494, 2225.1511, 2228.1665, 2235.2302, 2235.2302, 2268.2280, 2286.1941, 2291.1104, 2314.1516, 2326.2490, 2330.1890, 2332.1421, 2360.1626, 3223.6489

15. [HBB\\_SEMEN](#) Mass: 15999 Score: 128 Expect: 8.8e-008 Matches: 7

Hemoglobin subunit beta OS=Semnopithecus entellus GN=HBB PE=1 SV=1  
Observed Mr(expt) Mr(calc) ppm Start End Miss Ions Peptide  
1126.5620 1125.5547 1125.5567 -1.76 96 - 104 0 --- K.LHVDPENFR.L  
1274.7185 1273.7112 1273.7183 -5.55 31 - 40 0 --- R.LLVVYPWTQR.F  
1314.6691 1313.6618 1313.6575 3.26 18 - 30 0 --- K.VNVDEVGGEALGR.L  
1669.8772 1668.8699 1668.8835 -8.14 67 - 82 0 --- K.VLGAFSDDLHLNLIK.G  
1669.8772 1668.8699 1668.8835 -8.14 67 - 82 0 (77) K.VLGAFSDDLHLNLIK.G  
1669.8772 1668.8699 1668.8835 -8.14 67 - 82 0 91 K.VLGAFSDDLHLNLIK.G  
1797.9766 1796.9693 1796.9785 -5.09 66 - 82 1 --- K.KVLGAFSDDLHLNLIK.G

No match to: 979.5460, 1034.1182, 1147.5027, 1195.6837, 1195.6837, 1195.6837, 1205.6095, 1205.6095, 1219.6508, 1219.6508, 1219.6508, 1252.6511, 1267.7006, 1337.6794, 1337.6794, 1342.6943, 1360.6827, 1365.6962, 1367.6936, 1378.6844, 1378.6844, 1383.7865, 1384.7319, 1475.7609, 1529.7290, 1557.7811, 1563.7914, 1572.7805, 1572.7805, 1575.7814, 1585.7865, 1641.8524, 1648.8374, 1742.8954, 1759.9335, 1763.8998, 1771.9310, 1787.9608, 1811.9208, 1816.9521, 1853.9644, 1868.9490, 1871.9698, 1877.0233, 1881.0533, 1881.0533, 1929.9923, 1951.9395, 1994.1302, 2009.0477, 2042.1072, 2042.1072, 2058.9866, 2074.9434, 2107.2268, 2138.1482, 2184.1758, 2202.1494, 2225.1511, 2228.1665, 2235.2302, 2235.2302, 2268.2280, 2286.1941, 2291.1104, 2314.1516, 2326.2490, 2330.1890, 2332.1421, 2360.1626, 3223.6489

16. [HBD\\_ATEFU](#) Mass: 15882 Score: 128 Expect: 8.8e-008 Matches: 7

Hemoglobin subunit delta OS=Ateles fusciceps GN=HBD PE=1 SV=1  
Observed Mr(expt) Mr(calc) ppm Start End Miss Ions Peptide  
1126.5620 1125.5547 1125.5567 -1.76 96 - 104 0 --- K.LHVDPENFR.L  
1274.7185 1273.7112 1273.7183 -5.55 31 - 40 0 --- R.LLVVYPWTQR.F  
1314.6691 1313.6618 1313.6575 3.26 18 - 30 0 --- K.VNVDEVGGEALGR.L  
1669.8772 1668.8699 1668.8835 -8.14 67 - 82 0 --- K.VLGAFSDDLHLNLIK.G  
1669.8772 1668.8699 1668.8835 -8.14 67 - 82 0 (77) K.VLGAFSDDLHLNLIK.G  
1669.8772 1668.8699 1668.8835 -8.14 67 - 82 0 91 K.VLGAFSDDLHLNLIK.G  
1797.9766 1796.9693 1796.9785 -5.09 66 - 82 1 --- K.KVLGAFSDDLHLNLIK.G

No match to: 979.5460, 1034.1182, 1147.5027, 1195.6837, 1195.6837, 1195.6837, 1205.6095, 1205.6095, 1219.6508, 1219.6508, 1219.6508, 1252.6511, 1267.7006, 1337.6794, 1337.6794, 1342.6943, 1360.6827, 1365.6962, 1367.6936, 1378.6844, 1378.6844, 1383.7865, 1384.7319, 1475.7609, 1529.7290, 1557.7811, 1563.7914, 1572.7805, 1572.7805, 1575.7814, 1585.7865, 1641.8524, 1648.8374, 1742.8954, 1759.9335, 1763.8998, 1771.9310, 1787.9608, 1811.9208, 1816.9521, 1853.9644, 1868.9490, 1871.9698, 1877.0233, 1881.0533, 1881.0533, 1929.9923, 1951.9395, 1994.1302, 2009.0477, 2042.1072, 2042.1072, 2058.9866, 2074.9434, 2107.2268, 2138.1482, 2184.1758, 2202.1494, 2225.1511, 2228.1665, 2235.2302, 2235.2302, 2268.2280, 2286.1941, 2291.1104, 2314.1516, 2326.2490, 2330.1890, 2332.1421, 2360.1626, 3223.6489

17. [HBB\\_ALOBE](#) Mass: 16161 Score: 128 Expect: 8.8e-008 Matches: 7

Hemoglobin subunit beta OS=Alouatta belzebul GN=HBB PE=2 SV=3  
Observed Mr(expt) Mr(calc) ppm Start End Miss Ions Peptide  
1126.5620 1125.5547 1125.5567 -1.76 97 - 105 0 --- K.LHVDPENFR.L  
1274.7185 1273.7112 1273.7183 -5.55 32 - 41 0 --- R.LLVVYPWTQR.F  
1314.6691 1313.6618 1313.6575 3.26 19 - 31 0 --- K.VNVDEVGGEALGR.L  
1669.8772 1668.8699 1668.8835 -8.14 68 - 83 0 --- K.VLGAFSDDLHLNLIK.G  
1669.8772 1668.8699 1668.8835 -8.14 68 - 83 0 (77) K.VLGAFSDDLHLNLIK.G  
1669.8772 1668.8699 1668.8835 -8.14 68 - 83 0 91 K.VLGAFSDDLHLNLIK.G  
1797.9766 1796.9693 1796.9785 -5.09 67 - 83 1 --- K.KVLGAFSDDLHLNLIK.G

No match to: 979.5460, 1034.1182, 1147.5027, 1195.6837, 1195.6837, 1195.6837, 1205.6095, 1205.6095, 1219.6508, 1219.6508, 1219.6508, 1252.6511, 1267.7006, 1337.6794, 1337.6794, 1342.6943, 1360.6827, 1365.6962, 1367.6936, 1378.6844, 1378.6844, 1383.7865, 1384.7319, 1475.7609, 1529.7290, 1557.7811, 1563.7914, 1572.7805, 1572.7805, 1575.7814, 1585.7865, 1641.8524, 1648.8374, 1742.8954, 1759.9335, 1763.8998, 1771.9310, 1787.9608, 1811.9208, 1816.9521, 1853.9644, 1868.9490, 1871.9698, 1877.0233, 1881.0533, 1881.0533, 1929.9923, 1951.9395, 1994.1302, 2009.0477, 2042.1072, 2042.1072, 2058.9866, 2074.9434, 2107.2268, 2138.1482, 2184.1758, 2202.1494, 2225.1511, 2228.1665, 2235.2302, 2235.2302, 2268.2280, 2286.1941, 2291.1104, 2314.1516, 2326.2490, 2330.1890, 2332.1421, 2360.1626, 3223.6489

18. [HBB\\_ATEPA](#) Mass: 16150 Score: 128 Expect: 8.8e-008 Matches: 7

Hemoglobin subunit beta OS=Ateles paniscus GN=HBB PE=1 SV=3  
Observed Mr(expt) Mr(calc) ppm Start End Miss Ions Peptide



|           |           |           |       |    |   |     |   |      |                      |
|-----------|-----------|-----------|-------|----|---|-----|---|------|----------------------|
| 1126.5620 | 1125.5547 | 1125.5567 | -1.76 | 97 | - | 105 | 0 | ---  | K.LHVDPENFR.L        |
| 1274.7185 | 1273.7112 | 1273.7183 | -5.55 | 32 | - | 41  | 0 | ---  | R.LLVVYPWTQR.F       |
| 1314.6691 | 1313.6618 | 1313.6575 | 3.26  | 19 | - | 31  | 0 | ---  | K.VNVDEVGGEALGR.L    |
| 1669.8772 | 1668.8699 | 1668.8835 | -8.14 | 68 | - | 83  | 0 | ---  | K.VLGAFSDGLAHLNLK.G  |
| 1669.8772 | 1668.8699 | 1668.8835 | -8.14 | 68 | - | 83  | 0 | (77) | K.VLGAFSDGLAHLNLK.G  |
| 1669.8772 | 1668.8699 | 1668.8835 | -8.14 | 68 | - | 83  | 0 | 91   | K.VLGAFSDGLAHLNLK.G  |
| 1797.9766 | 1796.9693 | 1796.9785 | -5.09 | 67 | - | 83  | 1 | ---  | K.KVLGAFSDGLAHLNLK.G |

No match to: 979.5460, 1034.1182, 1147.5027, 1195.6837, 1195.6837, 1195.6837, 1205.6095, 1205.6095, 1219.6508, 1219.6508, 1219.6508, 1252.6511, 1267.7006, 1337.6794, 1337.6794, 1342.6943, 1360.6827, 1365.6962, 1367.6936, 1378.6844, 1378.6844, 1383.7865, 1384.7319, 1475.7609, 1529.7290, 1557.7811, 1563.7914, 1572.7805, 1572.7805, 1575.7814, 1585.7865, 1641.8524, 1648.8374, 1742.8954, 1759.9335, 1763.8998, 1771.9310, 1787.9608, 1811.9208, 1816.9521, 1853.9644, 1868.9490, 1871.9698, 1877.0233, 1881.0533, 1881.0533, 1929.9923, 1951.9395, 1994.1302, 2009.0477, 2042.1072, 2042.1072, 2058.9866, 2074.9434, 2107.2268, 2138.1482, 2184.1758, 2202.1494, 2225.1511, 2228.1665, 2235.2302, 2235.2302, 2268.2280, 2286.1941, 2291.1104, 2314.1516, 2326.2490, 2330.1890, 2332.1421, 2360.1626, 3223.6489

19. [HBB PITPI](#)Mass: 16147      Score: 128      Expect: 8.8e-008      Matches: 7

Hemoglobin subunit beta OS=Pythecia pithecia GN=HBB PE=2 SV=3

| Observed  | Mr(expt)  | Mr(calc)  | ppm   | Start | End | Miss | Ions | Peptide                 |
|-----------|-----------|-----------|-------|-------|-----|------|------|-------------------------|
| 1126.5620 | 1125.5547 | 1125.5567 | -1.76 | 97    | -   | 105  | 0    | ---K.LHVDPENFR.L        |
| 1274.7185 | 1273.7112 | 1273.7183 | -5.55 | 32    | -   | 41   | 0    | ---R.LLVVYPWTQR.F       |
| 1314.6691 | 1313.6618 | 1313.6575 | 3.26  | 19    | -   | 31   | 0    | ---K.VNVDEVGGEALGR.L    |
| 1669.8772 | 1668.8699 | 1668.8835 | -8.14 | 68    | -   | 83   | 0    | ---K.VLGAFSDGLAHLNLK.G  |
| 1669.8772 | 1668.8699 | 1668.8835 | -8.14 | 68    | -   | 83   | 0    | (77)K.VLGAFSDGLAHLNLK.G |
| 1669.8772 | 1668.8699 | 1668.8835 | -8.14 | 68    | -   | 83   | 0    | 91K.VLGAFSDGLAHLNLK.G   |
| 1797.9766 | 1796.9693 | 1796.9785 | -5.09 | 67    | -   | 83   | 1    | ---K.KVLGAFSDGLAHLNLK.G |

No match to: 979.5460, 1034.1182, 1147.5027, 1195.6837, 1195.6837, 1195.6837, 1205.6095, 1205.6095, 1219.6508, 1219.6508, 1219.6508, 1252.6511, 1267.7006, 1337.6794, 1337.6794, 1342.6943, 1360.6827, 1365.6962, 1367.6936, 1378.6844, 1378.6844, 1383.7865, 1384.7319, 1475.7609, 1529.7290, 1557.7811, 1563.7914, 1572.7805, 1572.7805, 1575.7814, 1585.7865, 1641.8524, 1648.8374, 1742.8954, 1759.9335, 1763.8998, 1771.9310, 1787.9608, 1811.9208, 1816.9521, 1853.9644, 1868.9490, 1871.9698, 1877.0233, 1881.0533, 1881.0533, 1929.9923, 1951.9395, 1994.1302, 2009.0477, 2042.1072, 2042.1072, 2058.9866, 2074.9434, 2107.2268, 2138.1482, 2184.1758, 2202.1494, 2225.1511, 2228.1665, 2235.2302, 2235.2302, 2268.2280, 2286.1941, 2291.1104, 2314.1516, 2326.2490, 2330.1890, 2332.1421, 2360.1626, 3223.6489

20. [HBB SAISC](#)Mass: 16147      Score: 128      Expect: 8.8e-008      Matches: 7

Hemoglobin subunit beta OS=Saimiri sciureus GN=HBB PE=1 SV=2

| Observed  | Mr(expt)  | Mr(calc)  | ppm   | Start | End | Miss | Ions | Peptide                 |
|-----------|-----------|-----------|-------|-------|-----|------|------|-------------------------|
| 1126.5620 | 1125.5547 | 1125.5567 | -1.76 | 97    | -   | 105  | 0    | ---K.LHVDPENFR.L        |
| 1274.7185 | 1273.7112 | 1273.7183 | -5.55 | 32    | -   | 41   | 0    | ---R.LLVVYPWTQR.F       |
| 1314.6691 | 1313.6618 | 1313.6575 | 3.26  | 19    | -   | 31   | 0    | ---K.VNVDEVGGEALGR.L    |
| 1669.8772 | 1668.8699 | 1668.8835 | -8.14 | 68    | -   | 83   | 0    | ---K.VLGAFSDGLAHLNLK.G  |
| 1669.8772 | 1668.8699 | 1668.8835 | -8.14 | 68    | -   | 83   | 0    | (77)K.VLGAFSDGLAHLNLK.G |
| 1669.8772 | 1668.8699 | 1668.8835 | -8.14 | 68    | -   | 83   | 0    | 91K.VLGAFSDGLAHLNLK.G   |
| 1797.9766 | 1796.9693 | 1796.9785 | -5.09 | 67    | -   | 83   | 1    | ---K.KVLGAFSDGLAHLNLK.G |

No match to: 979.5460, 1034.1182, 1147.5027, 1195.6837, 1195.6837, 1195.6837, 1205.6095, 1205.6095, 1219.6508, 1219.6508, 1219.6508, 1252.6511, 1267.7006, 1337.6794, 1337.6794, 1342.6943, 1360.6827, 1365.6962, 1367.6936, 1378.6844, 1378.6844, 1383.7865, 1384.7319, 1475.7609, 1529.7290, 1557.7811, 1563.7914, 1572.7805, 1572.7805, 1575.7814, 1585.7865, 1641.8524, 1648.8374, 1742.8954, 1759.9335, 1763.8998, 1771.9310, 1787.9608, 1811.9208, 1816.9521, 1853.9644, 1868.9490, 1871.9698, 1877.0233, 1881.0533, 1881.0533, 1929.9923, 1951.9395, 1994.1302, 2009.0477, 2042.1072, 2042.1072, 2058.9866, 2074.9434, 2107.2268, 2138.1482, 2184.1758, 2202.1494, 2225.1511, 2228.1665, 2235.2302, 2235.2302, 2268.2280, 2286.1941, 2291.1104, 2314.1516, 2326.2490, 2330.1890, 2332.1421, 2360.1626, 3223.6489

## Search Parameters

Type of search :Sequence Query  
Enzyme :Trypsin  
Fixed modifications :[Carbamidomethyl \(C\)](#)  
Variable modifications : [Oxidation \(M\)](#)  
Mass values :Monoisotopic  
Protein Mass :Unrestricted  
Peptide Mass Tolerance : ± 80 ppm  
Fragment Mass Tolerance: ± 0.3 Da  
Max Missed Cleavages :1  
Instrument type :MALDI-TOF-TOF  
Query1 (979.5460,1+) :<no title>  
Query2 (1034.1182,1+) :<no title>  
Query3 (1126.5620,1+) :<no title>  
Query4 (1147.5027,1+) :<no title>  
Query5 (1195.6837,1+) :<no title>  
Query6 (1195.6837,1+) :MalDIWellID: 66572, SpectrumID: 144466,  
Query7 (1195.6837,1+) :MalDIWellID: 66572, SpectrumID: 144458,  
Query8 (1205.6095,1+) :<no title>  
Query9 (1205.6095,1+) :MalDIWellID: 66572, SpectrumID: 144459,  
Query10 (1219.6508,1+) :<no title>  
Query11 (1219.6508,1+) :MalDIWellID: 66572, SpectrumID: 144467,  
Query12 (1219.6508,1+) :MalDIWellID: 66572, SpectrumID: 144460,  
Query13 (1252.6511,1+) :<no title>  
Query14 (1267.7006,1+) :<no title>  
Query15 (1274.7185,1+) :<no title>  
Query16 (1314.6691,1+) :<no title>  
Query17 (1337.6794,1+) :<no title>  
Query18 (1337.6794,1+) :MalDIWellID: 66572, SpectrumID: 144465,  
Query19 (1342.6943,1+) :<no title>  
Query20 (1360.6827,1+) :<no title>  
Query21 (1365.6962,1+) :<no title>  
Query22 (1367.6936,1+) :<no title>



Query23 (1378.6844,1+) : <no title>  
 Query24 (1378.6844,1+) : MaldiWellID: 66572, SpectrumID: 144457,  
 Query25 (1383.7865,1+) : <no title>  
 Query26 (1384.7319,1+) : <no title>  
 Query27 (1475.7609,1+) : <no title>  
 Query28 (1529.7290,1+) : <no title>  
 Query29 (1557.7811,1+) : <no title>  
 Query30 (1563.7914,1+) : <no title>  
 Query31 (1572.7805,1+) : <no title>  
 Query32 (1572.7805,1+) : MaldiWellID: 66572, SpectrumID: 144464,  
 Query33 (1575.7814,1+) : <no title>  
 Query34 (1585.7865,1+) : <no title>  
 Query35 (1641.8524,1+) : <no title>  
 Query36 (1648.8374,1+) : <no title>  
 Query37 (1669.8772,1+) : <no title>  
 Query38 (1669.8772,1+) : MaldiWellID: 66572, SpectrumID: 144468,  
 Query39 (1669.8772,1+) : MaldiWellID: 66572, SpectrumID: 144461,  
 Query40 (1742.8954,1+) : <no title>  
 Query41 (1759.9335,1+) : <no title>  
 Query42 (1763.8998,1+) : <no title>  
 Query43 (1771.9310,1+) : <no title>  
 Query44 (1787.9608,1+) : <no title>  
 Query45 (1797.9766,1+) : <no title>  
 Query46 (1811.9208,1+) : <no title>  
 Query47 (1816.9521,1+) : <no title>  
 Query48 (1853.9644,1+) : <no title>  
 Query49 (1868.9490,1+) : <no title>  
 Query50 (1871.9698,1+) : <no title>  
 Query51 (1877.0233,1+) : <no title>  
 Query52 (1881.0533,1+) : <no title>  
 Query53 (1881.0533,1+) : MaldiWellID: 66572, SpectrumID: 144456,  
 Query54 (1929.9923,1+) : <no title>  
 Query55 (1951.9395,1+) : <no title>  
 Query56 (1994.1302,1+) : <no title>  
 Query57 (2009.0477,1+) : <no title>  
 Query58 (2042.1072,1+) : <no title>  
 Query59 (2042.1072,1+) : MaldiWellID: 66572, SpectrumID: 144463,  
 Query60 (2058.9866,1+) : <no title>  
 Query61 (2074.9434,1+) : <no title>  
 Query62 (2107.2268,1+) : <no title>  
 Query63 (2138.1482,1+) : <no title>  
 Query64 (2184.1758,1+) : <no title>  
 Query65 (2202.1494,1+) : <no title>  
 Query66 (2225.1511,1+) : <no title>  
 Query67 (2228.1665,1+) : <no title>  
 Query68 (2235.2302,1+) : <no title>  
 Query69 (2235.2302,1+) : MaldiWellID: 66572, SpectrumID: 144462,  
 Query70 (2268.2280,1+) : <no title>  
 Query71 (2286.1941,1+) : <no title>  
 Query72 (2291.1104,1+) : <no title>  
 Query73 (2314.1516,1+) : <no title>  
 Query74 (2326.2490,1+) : <no title>  
 Query75 (2330.1890,1+) : <no title>  
 Query76 (2332.1421,1+) : <no title>  
 Query77 (2360.1626,1+) : <no title>  
 Query78 (3223.6489,1+) : <no title>



# MASCOT Search Results

## Protein View

### Band: 2

Match to: HBB\_HUMAN Score: 201 Expect: 4.4e-015  
Hemoglobin subunit beta OS=Homo sapiens GN=HBB PE=1 SV=2

Nominal mass (Mr): 16102; Calculated pI value: 6.75

NCBI BLAST search of HBB\_HUMAN against nr  
Unformatted [sequence string](#) for pasting into other applications

Taxonomy: [Homo sapiens](#)

Fixed modifications: Carbamidomethyl (C)

Variable modifications: Oxidation (M)

Cleavage by Trypsin: cuts C-term side of KR unless next residue is P

Sequence Coverage: 61%

Matched peptides shown in **Bold Red**

1 MVHLTPEEK**S** AVTALWGKVN VDEVGGEALG RLLVVYPWTQ RFESFGDLS  
51 TPDAVMGNPK VKAHGK**K**VLG AFSDDLALHD NLKGTATLS ELHCDKLHVD  
101 **PENFR**LLGNV LVCVLAHHFG KEFTPPVQAA YQKVVAGVAN ALAHKYH

Show predicted peptides also

Sort Peptides By ☒ Residue Number ☐ Increasing Mass ☐ Decreasing Mass

| Start - End | Observed  | Mr (expt) | Mr (calc) | ppm | Miss Sequence                                      |
|-------------|-----------|-----------|-----------|-----|----------------------------------------------------|
| 10 - 31     | 2228.1665 | 2227.1592 | 2227.1597 | -0  | 1 K.SAVTALWGKVNDEVGGEALGR.L (No match)             |
| 19 - 31     | 1314.6691 | 1313.6618 | 1313.6575 | 3   | 0 K.VNVDEVGGEALGR.L (No match)                     |
| 32 - 41     | 1274.7185 | 1273.7112 | 1273.7183 | -6  | 0 R.LLVVYPWTQR.F (No match)                        |
| 42 - 60     | 2058.9866 | 2057.9793 | 2057.9405 | 19  | 0 R.FFESFGDLSTPDAVMGNPK.V (No match)               |
| 42 - 60     | 2074.9434 | 2073.9361 | 2073.9354 | 0   | 0 R.FFESFGDLSTPDAVMGNPK.V Oxidation (M) (No match) |
| 42 - 62     | 2286.1941 | 2285.1868 | 2285.1038 | 36  | 1 R.FFESFGDLSTPDAVMGNPKV.A (No match)              |
| 67 - 83     | 1797.9766 | 1796.9693 | 1796.9785 | -5  | 1 K.KVLGAFSDGLAHLNLK.G (No match)                  |
| 68 - 83     | 1669.8772 | 1668.8699 | 1668.8835 | -8  | 0 K.VLGAFSDGLAHLNLK.G (No match)                   |
| 68 - 83     | 1669.8772 | 1668.8699 | 1668.8835 | -8  | 0 K.VLGAFSDGLAHLNLK.G (Ions score 77)              |
| 68 - 83     | 1669.8772 | 1668.8699 | 1668.8835 | -8  | 0 K.VLGAFSDGLAHLNLK.G (Ions score 91)              |
| 97 - 105    | 1126.5620 | 1125.5547 | 1125.5567 | -2  | 0 K.LHVDPENFR.L (No match)                         |
| 122 - 133   | 1378.6844 | 1377.6771 | 1377.6929 | -11 | 0 K.EFTPPVQAAAYQK.V (No match)                     |
| 122 - 133   | 1378.6844 | 1377.6771 | 1377.6929 | -11 | 0 K.EFTPPVQAAAYQK.V (Ions score 20)                |

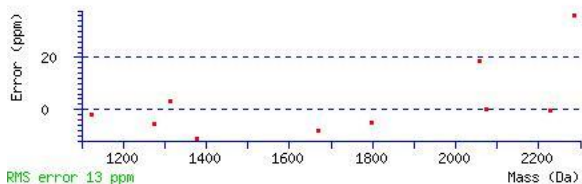



# Mascot Search Results

**Band** : 2  
**Search title** : SampleSetID: 759, AnalysisID: 6291, MalDIWellID: 66572, SpectrumID: 143906, Path=\\171004\\MSMS\\17-112 NCBI alveolata  
**Database** : NCBIInr 20120508 (17919084 sequences; 6150218869 residues)  
**Taxonomy** : Plasmodium falciparum (malaria parasite) (19026 sequences)  
**Timestamp** : 29 Nov 2017 at 15:05:52 GMT  
**Warning** : **A Peptide summary report will usually give a much clearer picture of MS/MS search results.**  
**Top Score** : 64 for **gi|160537**, surface protein [Plasmodium falciparum]

## Mascot Score Histogram

Protein score is  $-10 \times \log(P)$ , where P is the probability that the observed match is a random event.  
 Protein scores greater than 55 are significant ( $p < 0.05$ ).  
 Protein scores are derived from ions scores as a non-probabilistic basis for ranking protein hits.

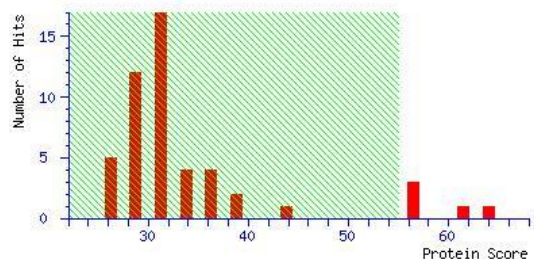

## Protein Summary Report

Format As Protein Summary (deprecated) [Help](#)

Significance threshold  $p <$   Max. number of hits

## Index

| Accession                        | Mass     | Score | Description                                                                                                             |
|----------------------------------|----------|-------|-------------------------------------------------------------------------------------------------------------------------|
| 1. <a href="#">gi 160537</a>     | 27813    | 64    | surface protein [Plasmodium falciparum]                                                                                 |
| 2. <a href="#">gi 160112</a>     | 33774    | 62    | beta-galactosidase, partial [Plasmodium falciparum]                                                                     |
| 3. <a href="#">gi 124512406</a>  | 7438257  |       | heat shock 70 kDa protein [Plasmodium falciparum 3D7]                                                                   |
| 4. <a href="#">gi 226045</a>     | 74741    | 57    | heat shock protein                                                                                                      |
| 5. <a href="#">gi 123598</a>     | 74754    | 57    | RecName: Full=Heat shock 70 kDa protein; Short=HSP70; AltName: Full=74.3 kDa protein; AltName: Full=Cytoplasmic antigen |
| 6. <a href="#">gi 78032833</a>   | 14212    | 44    | erythrocyte membrane protein [Plasmodium falciparum]                                                                    |
| 7. <a href="#">gi 124801272</a>  | 3693039  |       | conserved Plasmodium protein [Plasmodium falciparum 3D7]                                                                |
| 8. <a href="#">gi 124806675</a>  | 69389239 |       | conserved Plasmodium protein [Plasmodium falciparum 3D7]                                                                |
| 9. <a href="#">gi 90193411</a>   | 23053    | 37    | erythrocyte membrane protein 1 [Plasmodium falciparum]                                                                  |
| 10. <a href="#">gi 296005038</a> | 3057336  |       | 14-3-3 protein, putative [Plasmodium falciparum 3D7]                                                                    |
| 11. <a href="#">gi 78040295</a>  | 15497    | 36    | erythrocyte membrane protein [Plasmodium falciparum]                                                                    |
| 12. <a href="#">gi 258597288</a> | 18514635 |       | conserved Plasmodium protein [Plasmodium falciparum 3D7]                                                                |
| 13. <a href="#">gi 124514018</a> | 4744434  |       | aminomethyltransferase, mitochondrial precursor [Plasmodium falciparum 3D7]                                             |
| 14. <a href="#">gi 86171727</a>  | 38013    | 33    | conserved Plasmodium protein, unknown function [Plasmodium falciparum 3D7]                                              |
| 15. <a href="#">gi 124512370</a> | 12187133 |       | 2-oxoglutarate dehydrogenase E1 component [Plasmodium falciparum 3D7]                                                   |
| 16. <a href="#">gi 124804435</a> | 6056533  |       | TCP-1/cpn60 chaperonin family [Plasmodium falciparum 3D7]                                                               |
| 17. <a href="#">gi 124802981</a> | 8244332  |       | dynamin-like protein [Plasmodium falciparum 3D7]                                                                        |
| 18. <a href="#">gi 124806323</a> | 6130831  |       | t-complex protein 1, gamma subunit, putative [Plasmodium falciparum 3D7]                                                |
| 19. <a href="#">gi 48639487</a>  | 82415    | 31    | dynamin homologue [Plasmodium falciparum]                                                                               |
| 20. <a href="#">gi 90193419</a>  | 22992    | 31    | erythrocyte membrane protein 1 [Plasmodium falciparum]                                                                  |

## Results List

|    |                                                                                                                                                                                                                                                                                                                                                                                                                                                                                                                                                                                                                                                                                                                                                                  |             |           |                |                                                  |
|----|------------------------------------------------------------------------------------------------------------------------------------------------------------------------------------------------------------------------------------------------------------------------------------------------------------------------------------------------------------------------------------------------------------------------------------------------------------------------------------------------------------------------------------------------------------------------------------------------------------------------------------------------------------------------------------------------------------------------------------------------------------------|-------------|-----------|----------------|--------------------------------------------------|
| 1. | <a href="#">gi 160537</a>                                                                                                                                                                                                                                                                                                                                                                                                                                                                                                                                                                                                                                                                                                                                        | Mass: 27813 | Score: 64 | Expect: 0.0076 | Matches: 4                                       |
|    | surface protein [Plasmodium falciparum]                                                                                                                                                                                                                                                                                                                                                                                                                                                                                                                                                                                                                                                                                                                          |             |           |                |                                                  |
|    | Observed                                                                                                                                                                                                                                                                                                                                                                                                                                                                                                                                                                                                                                                                                                                                                         | Mr(expt)    | Mr(calc)  | ppm            | Start End Miss Ions Peptide                      |
|    | 1219.6508                                                                                                                                                                                                                                                                                                                                                                                                                                                                                                                                                                                                                                                                                                                                                        | 1218.6435   | 1218.6509 | -6.09          | 50 - 60 0 --- K.FHLDGIPPAPR.K                    |
|    | 1219.6508                                                                                                                                                                                                                                                                                                                                                                                                                                                                                                                                                                                                                                                                                                                                                        | 1218.6435   | 1218.6509 | -6.09          | 50 - 60 0 51 K.FHLDGIPPAPR.K                     |
|    | 1337.6794                                                                                                                                                                                                                                                                                                                                                                                                                                                                                                                                                                                                                                                                                                                                                        | 1336.6721   | 1336.6003 | 53.8           | 189 - 200 0 --- K.EAESVCAPIMSK.I + Oxidation (M) |
|    | 1365.6962                                                                                                                                                                                                                                                                                                                                                                                                                                                                                                                                                                                                                                                                                                                                                        | 1364.6889   | 1364.6572 | 23.3           | 175 - 186 1 --- K.NQLAGKDEYEAQ.Q                 |
|    | No match to: 979.5460, 1034.1182, 1126.5620, 1147.5027, 1195.6837, 1195.6837, 1205.6095, 1205.6095, 1252.6511, 1267.7006, 1274.7185, 1314.6691, 1342.6943, 1360.6827, 1367.6936, 1378.6844, 1378.6844, 1383.7865, 1384.7319, 1475.7609, 1529.7290, 1557.7811, 1563.7914, 1572.7805, 1575.7814, 1585.7865, 1641.8524, 1648.8374, 1669.8772, 1742.8954, 1759.9335, 1763.8998, 1771.9310, 1787.9608, 1797.9766, 1811.9208, 1816.9521, 1853.9644, 1868.9490, 1871.9698, 1877.0233, 1881.0533, 1881.0533, 1929.9923, 1951.9395, 1994.1302, 2009.0477, 2042.1072, 2058.9866, 2074.9434, 2107.2268, 2138.1482, 2184.1758, 2202.1494, 2225.1511, 2228.1665, 2235.2302, 2268.2280, 2286.1941, 2291.1104, 2314.1516, 2326.2490, 2330.1890, 2332.1421, 2360.1626, 3223.6489 |             |           |                |                                                  |
| 2. | <a href="#">gi 160112</a>                                                                                                                                                                                                                                                                                                                                                                                                                                                                                                                                                                                                                                                                                                                                        | Mass: 33774 | Score: 62 | Expect: 0.012  | Matches: 4                                       |
|    | beta-galactosidase, partial [Plasmodium falciparum]                                                                                                                                                                                                                                                                                                                                                                                                                                                                                                                                                                                                                                                                                                              |             |           |                |                                                  |
|    | Observed                                                                                                                                                                                                                                                                                                                                                                                                                                                                                                                                                                                                                                                                                                                                                         | Mr(expt)    | Mr(calc)  | ppm            | Start End Miss Ions Peptide                      |
|    | 1219.6508                                                                                                                                                                                                                                                                                                                                                                                                                                                                                                                                                                                                                                                                                                                                                        | 1218.6435   | 1218.6509 | -6.09          | 106 - 116 0 --- K.FHLDGIPPAPR.K                  |
|    | 1219.6508                                                                                                                                                                                                                                                                                                                                                                                                                                                                                                                                                                                                                                                                                                                                                        | 1218.6435   | 1218.6509 | -6.09          | 106 - 116 0 51 K.FHLDGIPPAPR.K                   |
|    | 1337.6794                                                                                                                                                                                                                                                                                                                                                                                                                                                                                                                                                                                                                                                                                                                                                        | 1336.6721   | 1336.6003 | 53.8           | 245 - 256 0 --- K.EAESVCAPIMSK.I + Oxidation (M) |



1365.6962 1364.6889 1364.6572 23.3 231 - 242 1 --- K.NQLAGKDEYEAK.Q  
**No match to:** 979.5460, 1034.1182, 1126.5620, 1147.5027, 1195.6837, 1195.6837, 1205.6095, 1205.6095, 1252.6511, 1267.7006, 1274.7185, 1314.6691, 1342.6943, 1360.6827, 1367.6936, 1378.6844, 1378.6844, 1383.7865, 1384.7319, 1475.7609, 1529.7290, 1557.7811, 1563.7914, 1572.7805, 1575.7814, 1585.7865, 1641.8524, 1648.8374, 1669.8772, 1742.8954, 1759.9335, 1763.8998, 1771.9310, 1787.9608, 1797.9766, 1811.9208, 1816.9521, 1853.9644, 1868.9490, 1871.9698, 1877.0233, 1881.0533, 1881.0533, 1929.9923, 1951.9395, 1994.1302, 2009.0477, 2042.1072, 2058.9866, 2074.9434, 2107.2268, 2138.1482, 2184.1758, 2202.1494, 2225.1511, 2228.1665, 2235.2302, 2268.2280, 2286.1941, 2291.1104, 2314.1516, 2326.2490, 2330.1890, 2332.1421, 2360.1626, 3223.6489

3. [gi|124512406](#) Mass: 74382 Score: 57 Expect: 0.041 Matches: 4

heat shock 70 kDa protein [Plasmodium falciparum 3D7]  

| Observed  | Mr(expt)  | Mr(calc)  | ppm   | Start | End | Miss | Ions | Peptide                              |
|-----------|-----------|-----------|-------|-------|-----|------|------|--------------------------------------|
| 1219.6508 | 1218.6435 | 1218.6509 | -6.09 | 472   | -   | 482  | 0    | --- K.FHLDGIPPAPR.K                  |
| 1219.6508 | 1218.6435 | 1218.6509 | -6.09 | 472   | -   | 482  | 0    | 51 K.FHLDGIPPAPR.K                   |
| 1337.6794 | 1336.6721 | 1336.6003 | 53.8  | 611   | -   | 622  | 0    | --- K.EAESVCAPIMSK.I + Oxidation (M) |
| 1365.6962 | 1364.6889 | 1364.6572 | 23.3  | 597   | -   | 608  | 1    | --- K.NQLAGKDEYEAK.Q                 |

**No match to:** 979.5460, 1034.1182, 1126.5620, 1147.5027, 1195.6837, 1195.6837, 1205.6095, 1205.6095, 1252.6511, 1267.7006, 1274.7185, 1314.6691, 1342.6943, 1360.6827, 1367.6936, 1378.6844, 1378.6844, 1383.7865, 1384.7319, 1475.7609, 1529.7290, 1557.7811, 1563.7914, 1572.7805, 1575.7814, 1585.7865, 1641.8524, 1648.8374, 1669.8772, 1742.8954, 1759.9335, 1763.8998, 1771.9310, 1787.9608, 1797.9766, 1811.9208, 1816.9521, 1853.9644, 1868.9490, 1871.9698, 1877.0233, 1881.0533, 1881.0533, 1929.9923, 1951.9395, 1994.1302, 2009.0477, 2042.1072, 2058.9866, 2074.9434, 2107.2268, 2138.1482, 2184.1758, 2202.1494, 2225.1511, 2228.1665, 2235.2302, 2268.2280, 2286.1941, 2291.1104, 2314.1516, 2326.2490, 2330.1890, 2332.1421, 2360.1626, 3223.6489

4. [gi|226045](#) Mass: 74741 Score: 57 Expect: 0.041 Matches: 4

heat shock protein  

| Observed  | Mr(expt)  | Mr(calc)  | ppm   | Start | End | Miss | Ions | Peptide                              |
|-----------|-----------|-----------|-------|-------|-----|------|------|--------------------------------------|
| 1219.6508 | 1218.6435 | 1218.6509 | -6.09 | 472   | -   | 482  | 0    | --- K.FHLDGIPPAPR.K                  |
| 1219.6508 | 1218.6435 | 1218.6509 | -6.09 | 472   | -   | 482  | 0    | 51 K.FHLDGIPPAPR.K                   |
| 1337.6794 | 1336.6721 | 1336.6003 | 53.8  | 611   | -   | 622  | 0    | --- K.EAESVCAPIMSK.I + Oxidation (M) |
| 1365.6962 | 1364.6889 | 1364.6572 | 23.3  | 597   | -   | 608  | 1    | --- K.NQLAGKDEYEAK.Q                 |

**No match to:** 979.5460, 1034.1182, 1126.5620, 1147.5027, 1195.6837, 1195.6837, 1205.6095, 1205.6095, 1252.6511, 1267.7006, 1274.7185, 1314.6691, 1342.6943, 1360.6827, 1367.6936, 1378.6844, 1378.6844, 1383.7865, 1384.7319, 1475.7609, 1529.7290, 1557.7811, 1563.7914, 1572.7805, 1575.7814, 1585.7865, 1641.8524, 1648.8374, 1669.8772, 1742.8954, 1759.9335, 1763.8998, 1771.9310, 1787.9608, 1797.9766, 1811.9208, 1816.9521, 1853.9644, 1868.9490, 1871.9698, 1877.0233, 1881.0533, 1881.0533, 1929.9923, 1951.9395, 1994.1302, 2009.0477, 2042.1072, 2058.9866, 2074.9434, 2107.2268, 2138.1482, 2184.1758, 2202.1494, 2225.1511, 2228.1665, 2235.2302, 2268.2280, 2286.1941, 2291.1104, 2314.1516, 2326.2490, 2330.1890, 2332.1421, 2360.1626, 3223.6489

5. [gi|123598](#) Mass: 74754 Score: 57 Expect: 0.041 Matches: 4

RecName: Full=Heat shock 70 kDa protein; Short=HSP70; AltName: Full=74.3 kDa protein; AltName: Full=Cytoplasmic antigen  

| Observed  | Mr(expt)  | Mr(calc)  | ppm   | Start | End | Miss | Ions | Peptide                              |
|-----------|-----------|-----------|-------|-------|-----|------|------|--------------------------------------|
| 1219.6508 | 1218.6435 | 1218.6509 | -6.09 | 472   | -   | 482  | 0    | --- K.FHLDGIPPAPR.K                  |
| 1219.6508 | 1218.6435 | 1218.6509 | -6.09 | 472   | -   | 482  | 0    | 51 K.FHLDGIPPAPR.K                   |
| 1337.6794 | 1336.6721 | 1336.6003 | 53.8  | 611   | -   | 622  | 0    | --- K.EAESVCAPIMSK.I + Oxidation (M) |
| 1365.6962 | 1364.6889 | 1364.6572 | 23.3  | 597   | -   | 608  | 1    | --- K.NQLAGKDEYEAK.Q                 |

**No match to:** 979.5460, 1034.1182, 1126.5620, 1147.5027, 1195.6837, 1195.6837, 1205.6095, 1205.6095, 1252.6511, 1267.7006, 1274.7185, 1314.6691, 1342.6943, 1360.6827, 1367.6936, 1378.6844, 1378.6844, 1383.7865, 1384.7319, 1475.7609, 1529.7290, 1557.7811, 1563.7914, 1572.7805, 1575.7814, 1585.7865, 1641.8524, 1648.8374, 1669.8772, 1742.8954, 1759.9335, 1763.8998, 1771.9310, 1787.9608, 1797.9766, 1811.9208, 1816.9521, 1853.9644, 1868.9490, 1871.9698, 1877.0233, 1881.0533, 1881.0533, 1929.9923, 1951.9395, 1994.1302, 2009.0477, 2042.1072, 2058.9866, 2074.9434, 2107.2268, 2138.1482, 2184.1758, 2202.1494, 2225.1511, 2228.1665, 2235.2302, 2268.2280, 2286.1941, 2291.1104, 2314.1516, 2326.2490, 2330.1890, 2332.1421, 2360.1626, 3223.6489



## Search Parameters

Type of search :Sequence Query  
Enzyme :Trypsin  
Fixed modifications :Carbamidomethyl (C)  
Variable modifications :Oxidation (M)  
Mass values :Monoisotopic  
Protein Mass :Unrestricted  
Peptide Mass Tolerance : ± 80 ppm  
Fragment Mass Tolerance: ± 0.3 Da  
Max Missed Cleavages :1  
Instrument type :MALDI-TOF-TOF  
Query1 (979.5460,1+) :<no title>  
Query2 (1034.1182,1+) :<no title>  
Query3 (1126.5620,1+) :<no title>  
Query4 (1147.5027,1+) :<no title>  
Query5 (1195.6837,1+) :<no title>  
Query6 (1195.6837,1+) :MaldiWellID: 66572, SpectrumID: 143909,  
Query7 (1205.6095,1+) :<no title>  
Query8 (1205.6095,1+) :MaldiWellID: 66572, SpectrumID: 143910,  
Query9 (1219.6508,1+) :<no title>  
Query10 (1219.6508,1+) :MaldiWellID: 66572, SpectrumID: 143911,  
Query11 (1252.6511,1+) :<no title>  
Query12 (1267.7006,1+) :<no title>  
Query13 (1274.7185,1+) :<no title>  
Query14 (1314.6691,1+) :<no title>  
Query15 (1337.6794,1+) :<no title>  
Query16 (1342.6943,1+) :<no title>  
Query17 (1360.6827,1+) :<no title>  
Query18 (1365.6962,1+) :<no title>  
Query19 (1367.6936,1+) :<no title>  
Query20 (1378.6844,1+) :<no title>  
Query21 (1378.6844,1+) :MaldiWellID: 66572, SpectrumID: 143908,  
Query22 (1383.7865,1+) :<no title>  
Query23 (1384.7319,1+) :<no title>  
Query24 (1475.7609,1+) :<no title>  
Query25 (1529.7290,1+) :<no title>  
Query26 (1557.7811,1+) :<no title>  
Query27 (1563.7914,1+) :<no title>  
Query28 (1572.7805,1+) :<no title>  
Query29 (1575.7814,1+) :<no title>  
Query30 (1585.7865,1+) :<no title>  
Query31 (1641.8524,1+) :<no title>  
Query32 (1648.8374,1+) :<no title>  
Query33 (1669.8772,1+) :<no title>  
Query34 (1742.8954,1+) :<no title>  
Query35 (1759.9335,1+) :<no title>  
Query36 (1763.8998,1+) :<no title>  
Query37 (1771.9310,1+) :<no title>  
Query38 (1787.9608,1+) :<no title>  
Query39 (1797.9766,1+) :<no title>  
Query40 (1811.9208,1+) :<no title>  
Query41 (1816.9521,1+) :<no title>  
Query42 (1853.9644,1+) :<no title>  
Query43 (1868.9490,1+) :<no title>  
Query44 (1871.9698,1+) :<no title>  
Query45 (1877.0233,1+) :<no title>  
Query46 (1881.0533,1+) :<no title>  
Query47 (1881.0533,1+) :MaldiWellID: 66572, SpectrumID: 143907,  
Query48 (1929.9923,1+) :<no title>  
Query49 (1951.9395,1+) :<no title>  
Query50 (1994.1302,1+) :<no title>  
Query51 (2009.0477,1+) :<no title>  
Query52 (2042.1072,1+) :<no title>  
Query53 (2058.9866,1+) :<no title>  
Query54 (2074.9434,1+) :<no title>  
Query55 (2107.2268,1+) :<no title>  
Query56 (2138.1482,1+) :<no title>  
Query57 (2184.1758,1+) :<no title>  
Query58 (2202.1494,1+) :<no title>  
Query59 (2225.1511,1+) :<no title>  
Query60 (2228.1665,1+) :<no title>  
Query61 (2235.2302,1+) :<no title>  
Query62 (2268.2280,1+) :<no title>  
Query63 (2286.1941,1+) :<no title>  
Query64 (2291.1104,1+) :<no title>  
Query65 (2314.1516,1+) :<no title>  
Query66 (2326.2490,1+) :<no title>  
Query67 (2330.1890,1+) :<no title>  
Query68 (2332.1421,1+) :<no title>  
Query69 (2360.1626,1+) :<no title>  
Query70 (3223.6489,1+) :<no title>



# Mascot Search Results

## Protein View

### Band: 2

Match to: [gi|160537](#) Score: 64 Expect: 0.0076

surface protein [*Plasmodium falciparum*]

Nominal mass ( $M_r$ ): 27813; Calculated pI value: 5.06

NCBI BLAST search of [gi|160537](#) against nr

Unformatted [sequence string](#) for pasting into other applications

Taxonomy: [Plasmodium falciparum](#)

Fixed modifications: Carbamidomethyl (C)

Variable modifications: Oxidation (M)

Cleavage by Trypsin: cuts C-term side of KR unless next residue is P

Sequence Coverage: 13%

Matched peptides shown in **Bold Red**

1 MTKLIERNNTT IPAKKSQIFT TYADNQPGVL IQVYEGERAL TKDNNLLGKF  
51 **HLDGIPPAPR** KVPQIEVTFD IDANGILNVT AVEKSTGKQN HITITNDKGR  
101 LSQDEIDRMV NDAEKYKAED EENRKRIEAR NSLENYCYGV KSSLEDQKIK  
151 EKLQPAEIET CMKTITTTILE WLEK**NQLAGK DEYEAKQKEA ESVCAPIMSK**  
201 IYQDAAGAAG GMPGMPGGM PGGMPGGMNF PGGMPGAGMP GNAPAGSGPT  
251 VEEVD

Show predicted peptides also

Sort Peptides By ☒ Residue Number ☐ Increasing Mass ☐ Decreasing Mass

| Start - End | Observed  | Mr (expt) | Mr (calc) | ppm | Miss | Sequence         |                                            |
|-------------|-----------|-----------|-----------|-----|------|------------------|--------------------------------------------|
| 50 - 60     | 1219.6508 | 1218.6435 | 1218.6509 | -6  | 0    | K.FHLDGIPPAPR.K  | ( <a href="#">No match</a> )               |
| 50 - 60     | 1219.6508 | 1218.6435 | 1218.6509 | -6  | 0    | K.FHLDGIPPAPR.K  | ( <a href="#">Ions score 51</a> )          |
| 175 - 186   | 1365.6962 | 1364.6889 | 1364.6572 | 23  | 1    | K.NQLAGKDEYEAK.Q | ( <a href="#">No match</a> )               |
| 189 - 200   | 1337.6794 | 1336.6721 | 1336.6003 | 54  | 0    | K.EAESVCAPIMSK.I | Oxidation (M) ( <a href="#">No match</a> ) |

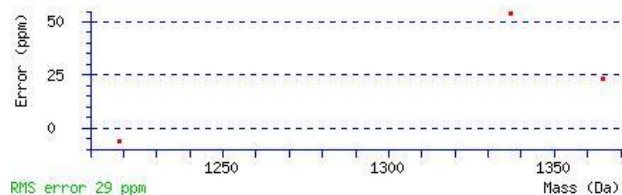

Mascot: <http://www.matrixscience.com/>



## Protein View

Band: 2

Match to: gi|160537 Score: 64 Expect: 0.0076  
surface protein [Plasmodium falciparum]

Nominal mass (Mr): 27813; Calculated pI value: 5.06

NCBI BLAST search of gi|160537 against nr  
Unformatted [sequence string](#) for pasting into other applications

Taxonomy: [Plasmodium falciparum](#)

Fixed modifications: Carbamidomethyl (C)

Variable modifications: Oxidation (M)

Cleavage by Trypsin: cuts C-term side of KR unless next residue is P

Sequence Coverage: 13%

Matched peptides shown in **Red**

1 MTKLIERNTT IPAKKSQIFT TYADNQPGLV IQVYEGERAL TKDNNLLGKF  
51 **HLDGIPPAPR** KVPQIEVTFD IDANGILNVT AVEKSTGKQN HITITNDKGR  
101 LSQDEIDRMV NDAEKYKAEED EENRKRIEAR NSLENYCYGV  
KSSLEDQKIK  
151 EKLQPAELET CMKTITITILE WLEKNQLAGK **DEYEAKQKEA**  
**ESVCAPIMSK**  
201 IYQDAAGAAG GMPGGMPGGM PGGMPGGMNF PGGMPGAGMP  
GNAPAGSGPT  
251 VEEVD

Show predicted peptides also

Sort Peptides By ☒ Residue Number ☐ Increasing Mass ☐ Decreasing Mass

| Start - End | Observed  | Mr (expt) | Mr (calc) | ppm | Miss Sequence      |                                            |
|-------------|-----------|-----------|-----------|-----|--------------------|--------------------------------------------|
| 50 - 60     | 1219.6508 | 1218.6435 | 1218.6509 | -6  | 0 K.FHLDGIPPAPR.K  | ( <a href="#">No match</a> )               |
| 50 - 60     | 1219.6508 | 1218.6435 | 1218.6509 | -6  | 0 K.FHLDGIPPAPR.K  | ( <a href="#">Ions score 51</a> )          |
| 175 - 186   | 1365.6962 | 1364.6889 | 1364.6572 | 23  | 1 K.NQLAGKDEYEAK.Q | ( <a href="#">No match</a> )               |
| 189 - 200   | 1337.6794 | 1336.6721 | 1336.6003 | 54  | 0 K.EAESVCAPIMSK.I | Oxidation (M) ( <a href="#">No match</a> ) |

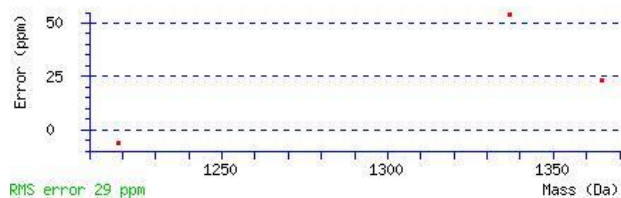

Supplement: s1 [file s1]
