# Supplementary material for: Sickle Cell Trait Induces Oxidative Damage on Plasmodium falciparum Proteome at Erythrocyte Stages
Source: MDPI journal article supplement (doi:10.3390/ijms20225769), 2019-11-16
Supplement: s1 [file s1]

## **Supplementary Material 1**

**Sickle Cell Trait Induce Oxidative Damage on *Plasmodium falciparum* Proteome at  
Erythrocyte Stages**

## Supplementary Tables

**Supplementary table 1.** Summary of harvested cultures of *P. falciparum* 3D7 at high parasitaemia.

| Donor | Condition | Vol. (μL) | % Parasitemia/stage |              |           |
|-------|-----------|-----------|---------------------|--------------|-----------|
|       |           |           | Rings               | Trophozoites | Schizonts |
| NC    | HbAA      | 750       | 38%                 | 35%          | 37%       |
|       |           |           | 38%                 | 38%          | 37%       |
|       |           |           | 40%                 | ---          | 40%       |
| ST    | HbAS      | 800       | 34%                 | 38%          | 35%       |
|       |           |           | 38%                 | 34%          | 36%       |
|       |           |           | 37%                 | 35%          | 32%       |
| MC    | HbAS      | 800       | 37%                 | 35%          | 38%       |
|       |           |           | 36%                 | 37%          | 38%       |
|       |           |           | ---                 | 37%          | 38%       |
| MJ    | HbAS      | 800       | 40%                 | 38%          | 38%       |
|       |           |           | 40%                 | 36%          | 38%       |
|       |           |           | 40%                 | 37%          | 38%       |

Triplicates of synchronous cultures at high parasitaemia were harvested for control (HbAA) and sickle cell trait carriers (HbAS) groups.

**Supplementary table 2.** Parasite proteins yielding obtained from synchronous cultures of *P. falciparum* 3D7 at high parasitaemias.

| Donor | Condition | Yielding by Asexual Stage (μg parasite proteins/μL of iRBC) |              |           |
|-------|-----------|-------------------------------------------------------------|--------------|-----------|
|       |           | Rings                                                       | Trophozoites | Schizonts |
| NC    | HbAA      | 1.1 ± 0.4                                                   | 0.6 ± 0.02   | 0.6 ± 0.3 |
| ST    | HbAS      | 1.2 ± 0.4                                                   | 1.3 ± 0.6    | 2.3 ± 0.7 |
| MC    | HbAS      | 1.4 ± 0.2                                                   | 2.2 ± 0.2    | 1.8 ± 0.2 |
| MJ    | HbAS      | 0.9 ± 0.08                                                  | 1.1 ± 0.07   | 1.2 ± 0.2 |

**Supplementary table 3.** Data used to evaluate repeatability and reproducibility of carbonyl calibration curve.

| C.I.  | Repeatability - Day 1<br>(2 Membranes) |         |                 | Day 2<br>(1 Membrane) | Reproducibility |      |
|-------|----------------------------------------|---------|-----------------|-----------------------|-----------------|------|
|       | Spot intensities*                      |         |                 | Spot intensities*     |                 |      |
|       | Curve 1                                | Curve 2 | Mean $\pm$ SD   | Curve 3               | Mean $\pm$ SD   | RSD  |
| 0.76  | 1.24                                   | 1.36    | 1.30 $\pm$ 0.09 | 1.28                  | 1.29 $\pm$ 0.06 | 0.05 |
| 1.49  | 1.75                                   | 1.55    | 1.65 $\pm$ 0.14 | 1.61                  | 1.64 $\pm$ 0.10 | 0.06 |
| 2.03  | 1.66                                   | 1.75    | 1.71 $\pm$ 0.06 | 1.76                  | 1.72 $\pm$ 0.06 | 0.03 |
| 2.58  | 1.97                                   | 2.12    | 2.05 $\pm$ 0.11 | 1.89                  | 2.00 $\pm$ 0.12 | 0.06 |
| 3.49  | 2.12                                   | 2.13    | 2.12 $\pm$ 0.00 | 2.08                  | 2.11 $\pm$ 0.03 | 0.01 |
| 4.40  | 2.36                                   | 2.26    | 2.31 $\pm$ 0.07 | 2.25                  | 2.29 $\pm$ .06  | 0.03 |
| 6.21  | 2.82                                   | 2.67    | 2.75 $\pm$ 0.11 | 2.73                  | 2.74 $\pm$ 0.08 | 0.03 |
| 8.03  | 3.25                                   | 3.26    | 3.25 $\pm$ 0.01 | 3.17                  | 3.22 $\pm$ 0.05 | 0.01 |
| 13.79 | 4.46                                   | 4.76    | 4.60 $\pm$ 0.21 | 4.41                  | 4.54 $\pm$ 0.19 | 0.04 |
| 17.68 | 5.85                                   | 5.55    | 5.70 $\pm$ 0.21 | 5.80                  | 5.73 $\pm$ 0.16 | 0.03 |

C.I.: Carbonyl index in nmoles of CO/mg of protein. Three calibration curves of BSA by Dot Blot were used for the determination of carbonyls index. \*The values of the intensities are expressed in pixels/ $\mu$ m and were adjusted to simple numbers dividing by a factor of 10<sup>6</sup>.

**Supplementary table 4.** Parameters to evaluation of repeatability and reproducibility of carbonyl index calibration curves.

| Parameter                                      | Repeatability /Reproducibility Curves |                    |                    |                     | RSD<br>(%) |
|------------------------------------------------|---------------------------------------|--------------------|--------------------|---------------------|------------|
|                                                | Curve 1<br>(day 1)                    | Curve 2<br>(day 1) | Curve 3<br>(day 2) | Mean $\pm$ SD       |            |
| <b>Slope (m)</b>                               | 0.2528                                | 0.2468             | 0.2508             | 0.2501 $\pm$ 0.0031 | 1.22       |
| <b>Intercept (b)</b>                           | 1.2182                                | 1.2493             | 1.181              | 1.2162 $\pm$ 0.0342 | 2.81       |
| <b>Correlation coefficient (r<sup>2</sup>)</b> | 0.9914                                | 0.9942             | 0.9939             | 0.9932 $\pm$ 0.0015 | 0.15       |

Expressed as means  $\pm$  SD, seemed in 3 membrane independent.

**Supplementary table 5.** Intensities obtained for carbonylated protein bands of *P. falciparum* in Western blot assay.

| Donnor | Condition | Rings         | Trophozoites | Schizonts    |
|--------|-----------|---------------|--------------|--------------|
| NC     | HbAA      | 9.09 ± 2.2    | 18.92 ± 3.66 | 5.42 ± 0.35  |
| ST     | HbAS      | 29.29 ± 12.76 | 16.42 ± 3.00 | 21.75 ± 3.49 |
| MJ     | HbAS      | 32.28 ± 18.33 | 34.19 ± 5.80 | 23.23 ± 7.03 |
| MC     | HbAS      | 41.4 ± 5.38   | 21.16 ± 7.64 | 32.73 ± 4.32 |

Analysis of intensities of *P. falciparum* protein of rings, trophozoites and schizonts obtained on control and HbAS carrier.

**Supplementary table 6.** Relationship of carbonylation of *P. falciparum* protein in patterns band detected on HbAS carrier with respect control

| Quotien Intensities HbAS Carrier/Control HbAA |            |              |            |
|-----------------------------------------------|------------|--------------|------------|
| HbAS/HbAA                                     | Rings      | Trophozoites | Schizonts  |
| ST/NC                                         | 32         | 0.9          | 4.0        |
| MJ/NC                                         | 3.6        | 1.8          | 4.3        |
| MC/NC                                         | 4.6        | 1.1          | 6.0        |
| Average ± SD                                  | 3.8 ± 0.69 | 1.3 ± 0.49   | 4.8 ± 1.10 |

## Supplementary Figures

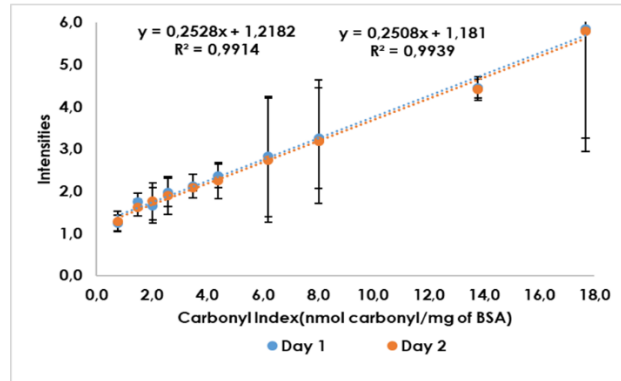

**Figure S1.** Repeatability of calibration curve employed to quantify carbonyl index of parasite protein. **A.** Repeatability of calibration curve. **B.** Reproducibility of calibration curve. Data were obtained from three independent calibration curves assayed in two days different. Intensities adjusted were calculated as Mean  $\pm$  SD. BSA: Bovine Serum Albumin.

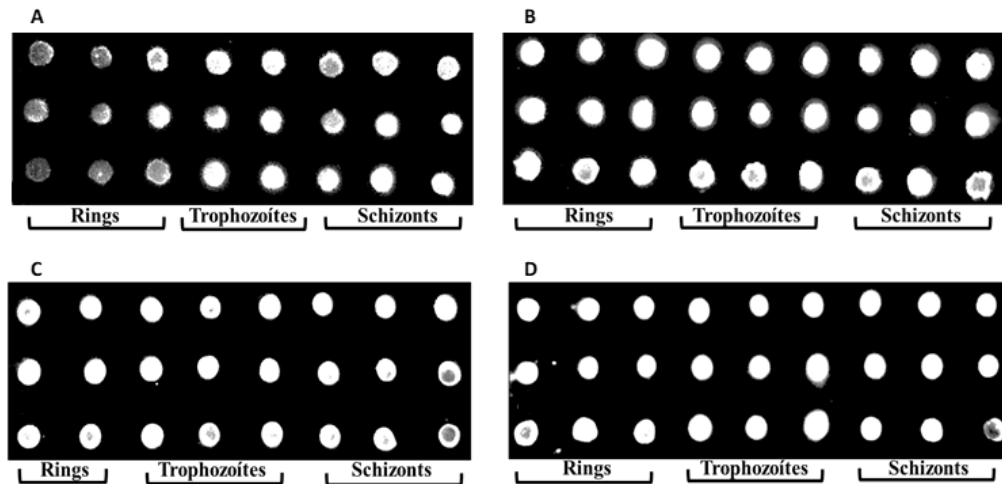

**Figure S2.** Dot blot membranes of *P. falciparum* carbonylated proteins across erythrocyte stages. Panels show samples of HbAA control (**A**) and HbAS carriers (**B**, **C** and **D**). 200 ng of protein of *P. falciparum* were spotted by triplicate on PVDF membranes.

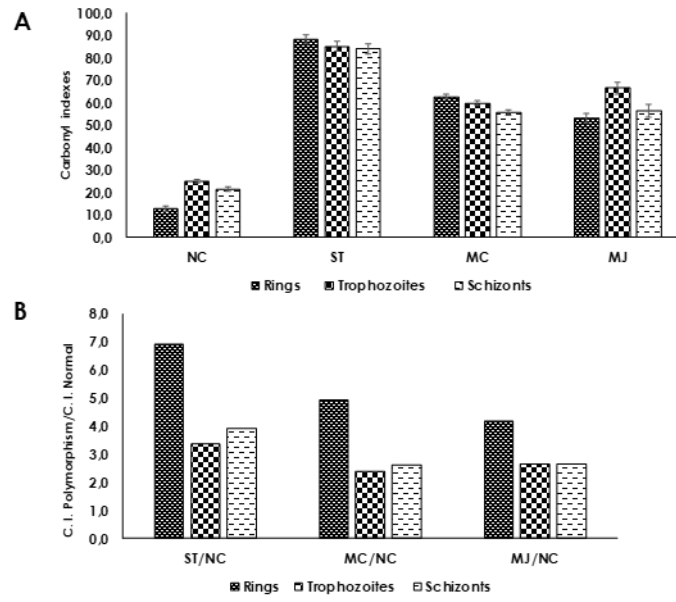

**Figure S3.** Behavior of carbonyl indexes on *P. falciparum* proteome at different moments.

**A.** Graph shows carbonyl index values (means  $\pm$  SD) for proteins obtained from asexual stages of parasites cultured in HbAA (NC) and HbAS (ST, MC and MJ) erythrocytes. **B.** Relative increasing of carbonyl indexes values calculated for samples with the quotient: carbonyl index of mutated/ carbonyl index of normal control.
